# Supplementary material for: Metal-free syntheses of new azocinesviaaddition reactions of enaminones with acenaphthoquinone followed by oxidative cleavages of the corresponding vicinal diols
Source: Royal Society of Chemistry journal article supplement (doi:10.1039/d0ra02852e), 2020-01-01
Supplement: d0ra02852e1.pdf [file d0ra02852e1.pdf]

## Supporting information

### Metal-free synthesis of new azocines via the addition reaction of enaminones with acenaphthoquinone followed by oxidative-cleavage of the corresponding vicinal diols

S. Hekmat Mousavi<sup>a</sup>, Mohammad Reza Mohammadizadeh<sup>\*a</sup>, Satoru Arimitsu<sup>b</sup>, Dariush Saberi<sup>c</sup>, Samira Poorsadeghi<sup>b</sup>, Kojya Genta<sup>d</sup>

<sup>a</sup>Department of Chemistry, Faculty of Sciences, Persian Gulf University, Bushehr 75169, Iran, Fax: +98-771-4541494, E-mail: [mrmohamadizadeh@pgu.ac.ir](mailto:mrmohamadizadeh@pgu.ac.ir)

<sup>b</sup>Department of Chemistry, Biology and Marine Science, Faculty of Science, University of the Ryukyus, 1-Senbaru, Nishihara, Nakagami, Okinawa, Japan, Zip code: 903-0213

<sup>c</sup>Marine Chemistry Department, Faculty of Marine Science and Technology, Persian Gulf University, Bushehr 75169, Iran

<sup>d</sup>Center for Research Advancement and Collaboration, University of the Ryukyus, Senbaru 1, Nishihara, Okinawa 903-0213, Japan

#### Table of Contents

|                                                                                  | Page |
|----------------------------------------------------------------------------------|------|
| General information                                                              | 2    |
| General procedure for the preparation of enaminones <b>1a-t</b>                  | 2    |
| General procedure for the synthesis of azocine derivatives <b>3a-t</b>           | 2    |
| Spectrum information of the synthesized azocine derivatives                      | 3    |
| <sup>1</sup> H-NMR and <sup>13</sup> C-NMR spectrum of the synthesized compounds | 16   |

**General information:** The chemicals used in this work were purchased from Merck and Sigma-Aldrich chemical companies and were used without purification. The progress of the reaction and the purity of compounds were monitored by TLC analytical silica gel plates (Merck 60 F<sub>250</sub>). Melting points were determined on an Electro thermal 9100 apparatus. IR spectra were recorded using a Shimadzu IR-470 spectrometer with KBr plates. <sup>1</sup>H-NMR and <sup>13</sup>C-NMR spectra were recorded on a Bruker DRX-400 AVANCE spectrometer in DMSO-d<sub>6</sub> as solvent.

#### **General procedure for the preparation of enaminones 1a-t**

1,3-Diketone (5 mmol), amine (5 mmol), I<sub>2</sub> (0.1 mmol), and CH<sub>3</sub>CN (5 mL) were added to a reaction tube. The tube was then sealed and stirred at room temperature for 1 h. In the most cases, enaminones **1** were precipitate from the reaction mixture as white crystals, which were collected on filter paper and further purified by washing with cool acetonitrile (2×2 mL). When the products were soluble in acetonitrile, the solvent was removed under reduced pressure, then water (10 mL) added and products extracted by ethyl acetate (3×3 mL). The organic layers were collected, washed with aqueous Na<sub>2</sub>S<sub>2</sub>O<sub>3</sub> solution and dried over anhydrous Na<sub>2</sub>SO<sub>4</sub>. After partial vaporization of solvent, the products were precipitated and the mixture was filtered to give the pure enaminones **1** as white solids.

#### **General procedure for the synthesis of azocine derivatives 3a-t:**

A mixture of enaminone **3** (1 mmol), Et<sub>3</sub>N (1 mmol), and acenaphthoquinone **2** (1 mmol) in EtOH (4 mL) was placed in the flask and the mixture stirred 12 hours at reflux condition. The progress of the reaction was monitored by thin layer chromatography using EtOAc/*n*-hexane as eluent. After completion of the reaction, the reaction mixture was cooled to room temperature and H<sub>5</sub>IO<sub>6</sub> (1 mmol) was added to the flask and the mixture stirred for additional 1 hour. The reaction mixture was filtered and the crude product was recrystallized from ethanol to afford the pure product **3**.

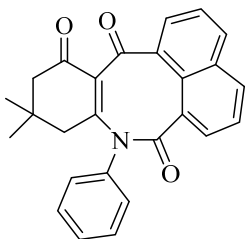

10,10-Dimethyl-8-phenyl-10,11-dihydro-7H-benzo[*b*]naphtho[1,8-*ef*]azocine 7,12,13(8H,9H)-trione (**3a**): isolated yield = 95%; white powder; mp = 224 °C; IR  $\text{cm}^{-1}$ : 1306, 1358, 1666, 1681, 1692, 1712, 2957, 3304;  $^1\text{H}$  NMR (400 MHz, DMSO-*d*<sub>6</sub>)  $\delta$  0.60 (s, 3H, CH<sub>3</sub>), 0.84 (s, 3H, CH<sub>3</sub>), 2.03 (d, *J* = 16.5 Hz, 1H, H-CH), 2.10-2.25 (m, 2H, CH<sub>2</sub>), 2.33 (d, *J* = 17.7 Hz, 1H, H-CH), 7.40–7.55 (m, 3H, arom), 7.60 (t, *J* = 7.8 Hz, 2H, arom), 7.66–7.82 (m, 3H, arom), 7.94 (d, *J* = 7.1 Hz, 1H, arom), 8.19 (t, *J* = 8.1 Hz, 2H, arom);  $^{13}\text{C}$  NMR (100 MHz, DMSO-*d*<sub>6</sub>)  $\delta$  27.1, 27.4, 33.3, 50.3, 126.7, 127.2, 127.3, 127.6, 127.7, 128.7, 129.1, 130.1, 130.6, 132.4, 132.8, 134.7, 136.5, 137.0, 137.8, 151.6, 168.0, 196.1, 198.2. HRMS (ESI) calcd for C<sub>26</sub>H<sub>21</sub>NO<sub>3</sub> [M+H]<sup>+</sup>: 396.1600; Found: 396.1595.

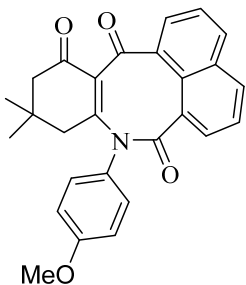

8-(4-Methoxyphenyl)-10,10-dimethyl-10,11-dihydro-7H-benzo[*b*]naphtho[1,8-*ef*]azocine-7,12,13(8H,9H)-trione (**3b**): isolated yield = 90%; white powder; mp >230 °C; IR  $\text{cm}^{-1}$ : 767, 810, 1356, 1639, 1671, 1693, 2923;  $^1\text{H}$  NMR (400 MHz, DMSO-*d*<sub>6</sub>)  $\delta$  0.62 (s, 3H, CH<sub>3</sub>), 0.84 (s, 3H, CH<sub>3</sub>), 2.02 (d, *J* = 16.5 Hz, 1H, H-CH), 2.12-2.24 (m, 2H, CH<sub>2</sub>), 2.33 (d, *J* = 17.6 Hz, 1H, H-CH), 3.83 (s, 3H, OCH<sub>3</sub>), 7.14 (d, *J* = 8.5 Hz, 2H, arom), 7.41 (d, *J* = 8.5 Hz, 2H, arom), 7.57–7.80 (m, 3H, arom), 7.91 (d, *J* = 6.9 Hz, 1H, arom), 8.18 (t, *J* = 8.6 Hz, 2H, arom);  $^{13}\text{C}$  NMR (100 MHz, DMSO-*d*<sub>6</sub>)  $\delta$  27.0, 27.4, 33.3, 50.3, 55.9, 115.3, 126.6, 127.2, 127.3, 127.6, 128.7, 128.9, 130.2, 130.6, 132.4, 132.8, 134.8,

136.0, 137.0, 151.8, 159.6, 168.1, 196.1, 198.4. HRMS (ESI) calcd for C<sub>27</sub>H<sub>23</sub>NO<sub>4</sub> [M+H]<sup>+</sup>: 426.1705; found: 426.1700.

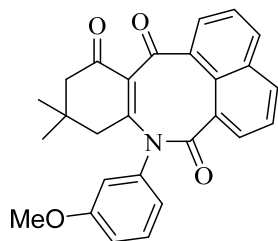

8-(3-Methoxyphenyl)-10,10-dimethyl-10,11-dihydro-7*H*-benzo[*b*]naphtho[1,8-*ef*]azocine-7,12,13(8*H*,9*H*)-trione (**3c**): isolated yield = 90%; white powder; mp >230 °C; IR cm<sup>-1</sup>: 766, 826, 1638, 1654, 1685, 2967, 3296; <sup>1</sup>H NMR (400 MHz, DMSO-*d*<sub>6</sub>) δ 0.61 (s, 3H, CH<sub>3</sub>), 0.85 (s, 3H, CH<sub>3</sub>), 2.03 (d, *J* = 16.5 Hz, 1H, H-CH), 2.15-2.26 (m, 2H, CH<sub>2</sub>), 2.35 (d, *J* = 17.6 Hz, 1H, CH), 3.84 (s, 3H, OCH<sub>3</sub>), 7.00-7.14 (m, 3H, arom), 7.50 (t, *J* = 7.9 Hz, 1H, arom), 7.67-7.80 (m, 3H, arom), 7.96 (d, *J* = 6.9 Hz, 1 H, arom), 8.18 (t, *J* = 8.4 Hz, 2H, arom); <sup>13</sup>C NMR (100 MHz, DMSO-*d*<sub>6</sub>) δ 26.9, 27.5, 33.3, 50.3, 55.9, 113.7, 114.5, 119.7, 126.6, 127.2, 127.3, 127.7, 128.7, 130.6, 130.9, 132.4, 132.8, 134.7, 136.4, 137.0, 138.8, 151.6, 160.5, 167.9, 196.1, 198.2. HRMS (ESI) calcd for C<sub>27</sub>H<sub>23</sub>NO<sub>4</sub> [M+H]<sup>+</sup>: 426.1705; found: 426.1699.

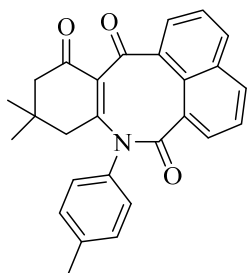

10,10-Dimethyl-8-(*p*-tolyl)-10,11-dihydro-7*H*-benzo[*b*]naphtho[1,8-*ef*]azocine-7,12,13(8*H*,9*H*)-trione (**3d**): isolated yield = 95%; white powder; mp = 225-227 °C; IR cm<sup>-1</sup>: 765, 808, 1302, 1357, 1653, 2341,

2360, 3030;  $^1\text{H}$  NMR (400 MHz,  $\text{DMSO-}d_6$ )  $\delta$  0.61 (s, 3H,  $\text{CH}_3$ ), 0.84 (s, 3H,  $\text{CH}_3$ ), 2.02 (d,  $J = 16.5$  Hz, 1H, H-CH), 2.11-2.24 (m, 2H,  $\text{CH}_2$ ), 2.32 (d,  $J = 17.7$  Hz, 1H, H-CH), 2.38 (s, 3H,  $\text{CH}_3$ ), 7.33-7.42 (m, 4H, arom), 7.66-7.77 (m, 3H, arom), 7.92 (d,  $J = 7.0$  Hz, 1H, arom), 8.18 (t,  $J = 8.4$  Hz, 2H, arom);  $^{13}\text{C}$  NMR (100 MHz,  $\text{DMSO-}d_6$ )  $\delta$  21.2, 27.0, 27.4, 33.3, 50.3, 126.6, 127.2, 127.3, 127.4, 127.7, 128.6, 130.5, 130.6, 132.4, 132.8, 134.8, 135.2, 136.2, 137.0, 138.7, 151.7, 168.0, 196.0, 198.3. HRMS (ESI) calcd for  $\text{C}_{27}\text{H}_{23}\text{NO}_3$   $[\text{M}+\text{H}]^+$ : 410.1756; found: 410.1751.

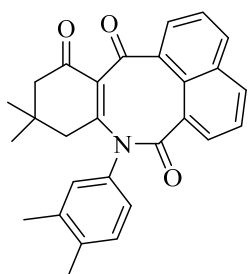

8-(3,4-Dimethylphenyl)-10,10-dimethyl-10,11-dihydro-7H-benzo[*b*]naphtho[1,8-*ef*]azocine-7,12,13(8*H*,9*H*)-trione (**3e**): isolated yield = 95%; white powder; mp = 227-229 °C; IR  $\text{cm}^{-1}$ : 773, 833, 1302, 1356, 1627, 1660, 1677, 2955;  $^1\text{H}$  NMR (400 MHz,  $\text{DMSO-}d_6$ )  $\delta$  0.60 (s, 3H,  $\text{CH}_3$ ), 0.84 (s, 3H,  $\text{CH}_3$ ), 2.02 (d,  $J = 16.5$  Hz, 1H, H-CH), 2.12-2.24 (m, 2H,  $\text{CH}_2$ ), 2.29 (s, 3H,  $\text{CH}_3$ ), 2.31 (s, 3H,  $\text{CH}_3$ ), 2-27-2.32 (d overlapped with  $\text{CH}_3$  singnals, 1H, H-CH), 7.18 (dd,  $J_1 = 7.9$  Hz,  $J_2 = 1.6$  Hz, 1H, Aarom), 7.28 (s, 1H, arom), 7.34 (d,  $J = 8.0$  Hz, 1H, arom) 7.66-7.76 (m, 3H, arom), 7.92 (d,  $J = 6.8$  Hz, 1H, arom), 8.18 (t,  $J = 8.5$  Hz, 2H, arom);  $^{13}\text{C}$  NMR (100 MHz,  $\text{DMSO-}d_6$ )  $\delta$  19.6, 19.9, 27.0, 27.4, 33.3, 50.3, 124.7, 126.6, 127.2, 127.4, 127.6, 128.4, 128.5, 130.5, 130.9, 132.4, 132.8, 134.9, 135.4, 136.1, 137.1, 137.4, 138.2, 151.7, 168.0, 196.1, 198.3. HRMS (ESI) calcd for  $\text{C}_{28}\text{H}_{25}\text{NO}_3$   $[\text{M}+\text{H}]^+$ : 424.1913; found: 424.1904.

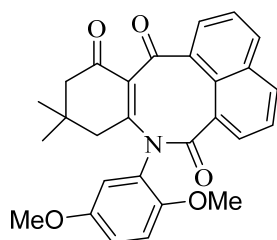

8-(2,5-Dimethoxyphenyl)-10,10-dimethyl-10,11-dihydro-7*H*-benzo[*b*]naphtho[1,8-*ef*]azocine-7,12,13(8*H*,9*H*)-trione (**3f**): isolated yield = 87%; white powder; mp >230 °C; IR  $\text{cm}^{-1}$ : 777, 1042, 1277, 1306, 1359, 1508, 1637, 1665, 1689, 2957;  $^1\text{H}$  NMR (400 MHz,  $\text{DMSO-}d_6$ )  $\delta$  0.64 (s, 3H,  $\text{CH}_3$ ), 0.85 (s, 3H,  $\text{CH}_3$ ), 2.04 (d,  $J = 16.5$  Hz, 1H, H-CH), 2.11-2.19 (m, 2H,  $\text{CH}_2$ ), 2.23 (d,  $J = 17.6$  Hz, 1H, H-CH), 3.78 (s, 3H,  $\text{OCH}_3$ ), 3.92 (s, 3H,  $\text{OCH}_3$ ), 6.8 (broad peak, 1H, arom), 7.08 (dd,  $J_1 = 9.0$  Hz,  $J_2 = 3.1$  Hz, 1H, arom), 7.22 (d,  $J = 9.0$  Hz, 1H, arom) 7.68-7.79 (m, 4H, arom), 8.11-8.25 (m, 2H, arom);  $^{13}\text{C}$  NMR (100 MHz,  $\text{DMSO-}d_6$ )  $\delta$  26.8, 27.6, 33.2, 50.3, 56.2, 57.0, 114.3, 115.2, 119.6, 126.7, 126.9, 127.3, 127.4, 127.5, 128.0, 130.4, 132.3, 132.5, 132.9, 135.0, 135.9, 137.3, 149.7, 151.8, 153.8, 167.5, 195.9. HRMS (ESI) calcd for  $\text{C}_{28}\text{H}_{25}\text{NO}_5$   $[\text{M}+\text{H}]^+$ : 456.1811; found: 456.1801.

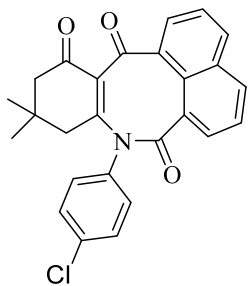

8-(4-Chlorophenyl)-10,10-dimethyl-10,11-dihydro-7*H*-benzo[*b*]naphtho[1,8-*ef*]azocine-7,12,13(8*H*,9*H*)-trione (**3g**): isolated yield = 92%; white powder; mp = 225-227 °C; IR  $\text{cm}^{-1}$ : 808, 1303, 1670, 2342, 2360, 2954;  $^1\text{H}$  NMR (400 MHz,  $\text{DMSO-}d_6$ )  $\delta$  0.60 (s, 3H,  $\text{CH}_3$ ), 0.85 (s, 3H,  $\text{CH}_3$ ), 2.03 (d,  $J = 16.4$  Hz, 1H, H-CH), 2.17-2.25 (m, 2H,  $\text{CH}_2$ ), 2.34 (d,  $J = 17.7$  Hz, 1H, H-CH), 7.53 (d,  $J = 8.5$  Hz, 2H, arom), 7.67-7.73 (m, 3H, arom), 7.76 (d,  $J = 7.3$  Hz, 2H, arom), 7.96 (d,  $J = 7.3$  Hz, 1H, arom), 8.19 (t,  $J = 7.7$  Hz, 2H, arom);  $^{13}\text{C}$  NMR (100 MHz,  $\text{DMSO-}d_6$ )  $\delta$  27.1, 27.3, 33.3, 50.2, 126.7, 127.2,

127.3, 127.8, 128.8, 129.4, 130.2, 130.8, 132.4, 132.9, 134.4, 136.6, 136.7, 136.8, 151.2, 168.0, 196.1, 198.1. HRMS (ESI) calcd for C<sub>26</sub>H<sub>20</sub>ClNO<sub>3</sub> [M+H]<sup>+</sup>: 430.1210; found: 430.1202.

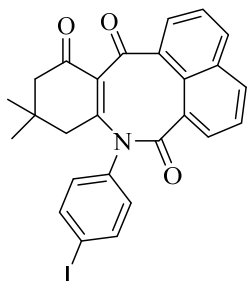

8-(4-Iodophenyl)-10,10-dimethyl-10,11-dihydro-7H-benzo[b]naphtho[1,8-ef]azocine-

7,12,13(8H,9H)-trione (**3h**): isolated yield = 94%; white powder; mp >230 °C; IR cm<sup>-1</sup>: 764, 1646, 2341, 2359, 2955; <sup>1</sup>H NMR (400 MHz, DMSO-*d*<sub>6</sub>) δ 0.60 (s, 3H, CH<sub>3</sub>), 0.86 (s, 3H, CH<sub>3</sub>), 2.03 (d, *J* = 16.3 Hz, 1H, H-CH), 2.16-2.26 (m, 2H, CH<sub>2</sub>), 2.32 (d, *J* = 17.5 Hz, 1H, H-CH), 7.31 (d, *J* = 8.2 Hz, 2H, arom), 7.68-7.73 (m, 1H, arom), 7.76 (d, *J* = 7.2 Hz, 2H, arom), 7.94-7.98 (m, 3H, arom), 8.19 (t, *J* = 7.9 Hz, 2H, arom); <sup>13</sup>C NMR (100 MHz, DMSO-*d*<sub>6</sub>) δ 27.1, 27.3, 33.3, 50.3, 95.1, 126.7, 127.2, 127.3, 127.8, 128.8, 129.7, 130.7, 132.4, 132.9, 134.5, 136.8, 136.9, 137.5, 138.9, 151.1, 167.9, 196.0, 198.1. HRMS (ESI) calcd for C<sub>26</sub>H<sub>20</sub>NO<sub>3</sub>I [M+H]<sup>+</sup>: 522.0566; found: 522.0554.

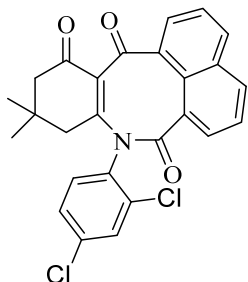

8-(2,4-Dichlorophenyl)-10,10-dimethyl-10,11-dihydro-7H-benzo[b]naphtho[1,8-ef]azocine-

7,12,13(8H,9H)-trione (**3i**): isolated yield = 92%; white powder; mp >230 °C; IR cm<sup>-1</sup>: 769, 817, 1306, 1360, 1634, 1671, 2360, 2951; <sup>1</sup>H NMR (400 MHz, DMSO-*d*<sub>6</sub>) δ 0.69 (s, 3H, CH<sub>3</sub>), 0.82 (s, 3H, CH<sub>3</sub>), 2.08-2.15 (m, 3H, CH<sub>2</sub>+H-CH), 2.36 (d, *J* = 17.7 Hz, 1H, H-CH), 7.39 (d, *J* = 8.4 Hz, 1H, arom), 7.70-

7.78 (m, 4H, arom) 7.85 (d,  $J = 6.7$  Hz, 1H, arom), 8.00 (s, 1H, arom), 8.21 (d,  $J = 7.8$  Hz, 2H, arom);  $^{13}\text{C}$  NMR (100 MHz, DMSO- $d_6$ )  $\delta$  26.3, 27.8, 30.1, 50.2, 126.8, 127.3, 127.4, 127.6, 128.4, 129.7, 130.2, 130.8, 131.0, 132.4, 133.9, 134.1, 134.2, 135.1, 136.1, 136.8, 150.7, 167.1, 196.0, 198.6. HRMS (ESI) calcd for  $\text{C}_{26}\text{H}_{19}\text{NO}_3\text{Cl}_2$   $[\text{M}+\text{H}]^+$ : 464.0820; found: 464.0808.

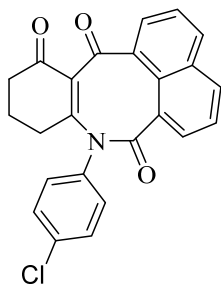

8-(4-Chlorophenyl)-10,11-dihydro-7H-benzo[*b*]naphtho[1,8-*ef*]azocine-7,12,13(8*H*,9*H*)-trione (**3j**): isolated yield = 92%; white powder; mp = 229 °C; IR  $\text{cm}^{-1}$ : 777, 1291, 1361, 1637, 1647, 1685, 1707, 1718, 2345, 2917;  $^1\text{H}$  NMR (400 MHz, DMSO- $d_6$ )  $\delta$  1.68-1.82 (m, 2H,  $\text{CH}_2$ ), 1.96-2.19 (m, 2H,  $\text{CH}_2$ ), 2.20-2.32 (m, 2H,  $\text{CH}_2$ ), 7.51-7.59 (m, 2H, arom), 7.64-7.80 (m, 5H, arom), 7.98 (dd,  $J_1 = 7.8$  Hz,  $J_2 = 0.8$  Hz, 1H, arom), 8.14-8.24 (m, 2H, arom);  $^{13}\text{C}$  NMR (100 MHz, DMSO- $d_6$ )  $\delta$  20.9, 27.0, 36.9, 126.6, 127.2, 127.3, 127.8, 128.8, 129.3, 130.2, 130.7, 132.4, 132.8, 133.4, 134.3, 136.9, 137.0, 137.7, 153.3, 168.0, 196.0, 198.0. HRMS (ESI) calcd for  $\text{C}_{24}\text{H}_{18}\text{NO}_3$   $[\text{M}+\text{H}]^+$ : 402.0897; found: 402.0891.

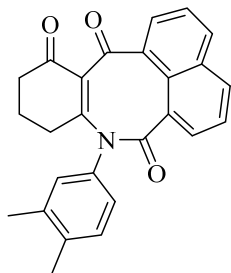

8-(3,4-Dimethylphenyl)-10,11-dihydro-7H-benzo[*b*]naphtho[1,8-*ef*]azocine-7,12,13(8*H*,9*H*)-trione (**3k**): isolated yield = 95%; white powder; mp = 225-227 °C; IR  $\text{cm}^{-1}$ : 779, 1295, 1361, 1637, 1653, 1693, 2341, 2360, 2962;  $^1\text{H}$  NMR (400 MHz, DMSO- $d_6$ )  $\delta$  1.64-1.81 (m, 2H,  $\text{CH}_2$ ), 2.03-2.15 (m, 1H,



CH), 2.15-2.28 (m, 2H, CH<sub>2</sub>), 2.29 (s, 3H, CH<sub>3</sub>), 2.31 (s, 3H, CH<sub>3</sub>), 2.38-2.45 (m, 1H, CH), 7.20 (dd,  $J_1 = 7.5$  Hz,  $J_2 = 2.2$  Hz, 1H, arom), 7.29 (s, 1H, arom), 7.3 (d,  $J = 7.8$  Hz, 1H, arom), 7.64-7.80 (m, 3H, arom), 7.92 (d,  $J = 6.7$  Hz, 1H, arom), 8.18 (t,  $J = 7.6$  Hz, arom); <sup>13</sup>C NMR (100 MHz, DMSO-*d*<sub>6</sub>) δ 19.6, 19.9, 20.9, 27.1, 37.0, 124.6, 126.6, 127.2, 127.3, 127.7, 128.2, 128.5, 130.5, 131.0, 132.4, 132.7, 134.8, 135.8, 137.0, 137.1, 137.4, 138.3, 153.9, 168.1, 196.0, 198.5. HRMS (ESI) calcd for C<sub>26</sub>H<sub>21</sub>NO<sub>3</sub> [M+H]<sup>+</sup>: 396.1600; found: 396.1592.

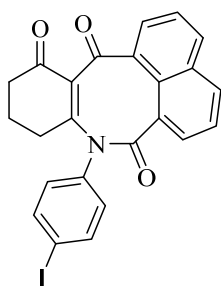

8-(4-Iodophenyl)-10,11-dihydro-7H-benzo[*b*]naphtho[1,8-*ef*]azocine-7,12,13(8*H*,9*H*)-trione (31): isolated yield = 90%; white powder; mp >230 °C; IR cm<sup>-1</sup>: 797, 1004, 1651, 2341, 2359, 2871, 3052; <sup>1</sup>H NMR (400 MHz, DMSO-*d*<sub>6</sub>) δ 1.66-1.85 (m, 2H, CH<sub>2</sub>), 2.04-2.16 (m, 1H, H-CH), 2.18-2.33 (m, 2H, CH<sub>2</sub>), 2.39-2.47 (m, 1H, H-CH), 7.33 (d,  $J = 8.2$  Hz, 2H, arom), 7.60-7.80 (m, 3H, arom), 7.90-7.80 (m, 3H, arom), 7.86-8.01 (m, 3H, arom), 8.19 (t,  $J = 6.8$  Hz, 2H, arom); <sup>13</sup>C NMR (100 MHz, DMSO-*d*<sub>6</sub>) δ 20.8, 27.0, 36.9, 95.0, 126.6, 127.2, 127.3, 127.8, 128.7, 129.6, 130.7, 132.4, 132.8, 134.3, 136.9, 137.7, 137.9, 139.0, 153.2, 167.9, 196.0, 198.3. HRMS (ESI) calcd for C<sub>24</sub>H<sub>16</sub>NO<sub>3</sub>I [M+H]<sup>+</sup>: 494.253; found: 494.0242.

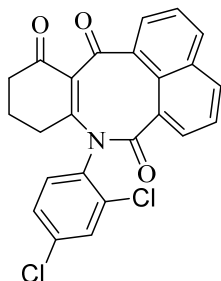

8-(2,4-Dichlorophenyl)-10,11-dihydro-7*H*-benzo[*b*]naphtho[1,8-*ef*]azocine-7,12,13(8*H*,9*H*)-trione

(**3m**): isolated yield = 90%; white powder; mp >230 °C; IR cm<sup>-1</sup>: 769, 811, 1127, 1644, 2349, 2359, 2889, 3089; <sup>1</sup>H NMR (400 MHz, DMSO-*d*<sub>6</sub>) δ 1.60-1.86 (m, 2H, CH<sub>2</sub>), 2.06-2.29 (m, 3H, CH<sub>2</sub>), 2.41-2.49 (m, 1H, H-CH), 7.42 (d, *J* = 8.3 Hz, 1H, arom), 7.65-7.80 (m, 3H, arom), 7.78 (d, *J* = 7.2 Hz, 2H, arom), 7.85 (d, *J* = 6.8 Hz, 1H, arom), 8.00 (brs, 1H, arom), 8.21 (d, *J* = 8.0 Hz, 2H, arom); <sup>13</sup>C NMR (100 MHz, DMSO-*d*<sub>6</sub>) δ 20.6, 26.3, 36.9, 126.7, 127.3, 127.4, 127.7, 128.5, 129.8, 130.3, 130.7, 131.0, 132.4, 132.8, 133.8, 134.1, 134.7, 135.1, 136.8, 136.9, 152.9, 167.2, 196.02, 198.8. HRMS (ESI) calcd for C<sub>24</sub>H<sub>15</sub>NO<sub>3</sub>Cl<sub>2</sub> [M+H]<sup>+</sup>: 436.0507; found: 436.0497.

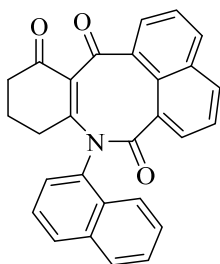

8-(Naphthalen-1-yl)-10,11-dihydro-7*H*-benzo[*b*]naphtho[1,8-*ef*]azocine-7,12,13(8*H*,9*H*)-trione (**3n**):

isolated yield = 90%; white powder; mp >230 °C; IR cm<sup>-1</sup>: 793, 1015, 1191, 1295, 1363, 1610, 1634, 1661, 1690, 2358, 2873, 3050; The <sup>1</sup>H NMR (400 MHz, DMSO-*d*<sub>6</sub>) spectra of this compound shows the existence of two of diastereomers (conformers) which their ratio was calculated from the integrals of the relative peaks as 1:0.21; δ 1.45-1.82 (m, 2.4H, CH<sub>2</sub> of major and minor conformers), 1.89-2.08 (m, 1.2H, H-CH of both conformers), 2.10-2.31 (m, 2.42H, CH<sub>2</sub> of both conformers), 2.54-2.64 (m, 1.21H, H-CH of both conformers), 7.58 (d, *J* = 6.9 Hz, 1H, arom), 7.63-7.95 (m, 7.26H, arom), 7.97-8.33 (m, 7.47H, arom); <sup>13</sup>C NMR (100 MHz, DMSO-*d*<sub>6</sub>) δ 20.5, 20.8, 26.7, 27.0, 36.9, 122.4, 122.7, 125.5, 126.6, 126.6, 126.7, 126.8, 127.2, 127.3, 127.4, 127.5, 127.8, 127.9, 128.1, 128.4, 128.7, 128.9, 129.1, 129.2, 130.1, 130.2, 130.3, 130.6, 130.9, 131.7, 132.3, 132.5, 132.7, 132.8, 134.4, 134.5, 134.7, 134.9, 135.1, 135.2, 136.5, 137.0, 137.4, 154.2, 154.3, 168.1, 170.9, 196.2, 199.0. HRMS (ESI) calcd for C<sub>28</sub>H<sub>19</sub>NO<sub>3</sub> [M+H]<sup>+</sup>: 418.1443; found: 418.1439.

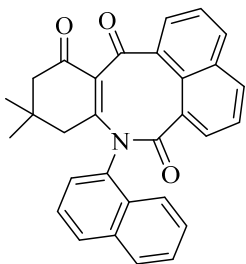

10,10-Dimethyl-8-(naphthalen-1-yl)-10,11-dihydro-7*H*-benzo[*b*]naphtho[1,8-*ef*]azocine-7,12,13(8*H*,9*H*)-trione (**3o**): isolated yield = 88%; white powder; mp >230 °C; IR  $\text{cm}^{-1}$ : 770, 805, 1313, 1357, 1680, 1633, 1666, 1680, 2360, 2952; The  $^1\text{H}$  NMR (400 MHz,  $\text{DMSO-}d_6$ ) spectra of this compound shows the existence of two of diastereomers (conformers) which their ratio was calculated from the integrals of the relative peaks as 1:0.18;  $\delta$  0.60 (s, 0.57H,  $\text{CH}_3$  of minor conformer), 0.64 (s, 0.57H,  $\text{CH}_3$  of minor conformer), 0.67 (s, 3H,  $\text{CH}_3$  of major conformer), 0.74 (s, 3H,  $\text{CH}_3$  of major conformer), 1.80-2.03 (m, 1.5H, H-CH of minor and major conformers), 2.03-2.20 (m, 2.38H, H- $\text{CH}_2$  of minor and major conformers), 3.31-2.49 (m, 1H, H-CH of major conformer), 7.57 (d,  $J = 7.2$  Hz, 1H, arom), 7.65-7.77 (m, 3.55H, arom), 7.78-7.90 (m, 3.73H, arom), 8.06 ( $J = 6.9$  Hz, 1H, arom) 8.13 (d,  $J = 9.3$  Hz, 2H, aqrom), 8.02-8.16 (m, 0.54H, arom), 8.18 (d,  $J = 8.5$  Hz, 1H, arom), 8.23 (d,  $J = 8.1$  Hz, 2H, arom), 8.17-8.26 (m, 0.55H, arom);  $^{13}\text{C}$  NMR (100 MHz,  $\text{DMSO-}d_6$ )  $\delta$  26.0, 27.0, 27.6, 28.0, 32.8, 32.9, 49.9, 50.3, 56.5, 122.7, 125.4, 125.5, 126.4, 126.8, 127.2, 127.4, 127.5, 127.7, 127.8, 128.5, 128.6, 128.8, 129.1, 129.3, 130.1, 130.3, 130.9, 132.5, 132.7, 132.8, 133.0, 134.4, 134.6, 134.7, 135.9, 137.0 151.9, 168.0, 196.1, 198.8. HRMS (ESI) calculated for  $\text{C}_{30}\text{H}_{23}\text{NO}_3$   $[\text{M}+\text{H}]^+$ : 446.1756; found: 446.1748.

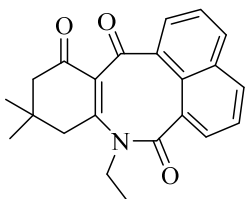

8-Ethyl-10,10-dimethyl-10,11-dihydro-7*H*-benzo[*b*]naphtho[1,8-*ef*]azocine-7,12,13(8*H*,9*H*)-trione (**3p**): isolated yield = 85%; white powder; mp = 226-228 °C; IR  $\text{cm}^{-1}$ : 669, 1284, 1634, 1689, 2341,

2359, 2959;  $^1\text{H}$  NMR (400 MHz,  $\text{DMSO-}d_6$ )  $\delta$  0.57 (s, 3H,  $\text{CH}_3$ ), 1.00 (s, 3H,  $\text{CH}_3$ ), 1.18 (t,  $J = 6.9$  Hz, 3H,  $\text{CH}_3$ ), 1.96 (d,  $J = 16.5$  Hz, 1H, H-CH), 2.21-2.32 (m, 2H,  $\text{CH}_2$ ), 2.86 (d,  $J = 17.5$  Hz, 1H, H-CH), 3.54 (m, 1H, H-CH<sub>Et</sub>), 4.06 (dq,  $J_1 = 14.1$  Hz,  $J_2 = 7.1$  Hz, 1H, H-CH<sub>Et</sub>), 7.59 (d,  $J = 6.9$  Hz, 1H, arom), 7.63-7.70 (m, 3H, arom), 8.05-8.22 (m, 2H, arom);  $^{13}\text{C}$  NMR (100 MHz,  $\text{DMSO-}d_6$ )  $\delta$  12.9, 26.9, 28.0, 33.6, 50.3, 126.5, 127.2, 127.3, 127.8, 128.6, 130.4, 132.3, 132.8, 135.1, 136.2, 137.0, 152.2, 167.1, 196.1, 197.7, 136.1, 136.8, 150.7, 167.1, 196.0, 198.6. HRMS (ESI) calcd for  $\text{C}_{22}\text{H}_{21}\text{NO}_3$   $[\text{M}+\text{H}]^+$ : 348.1600; found: 348.1593.

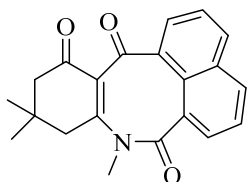

8,10,10-Trimethyl-10,11-dihydro-7H-benzo[*b*]naphtho[1,8-*ef*]azocine-7,12,13(8H,9H)-trione (**3q**): isolated yield = 85%; white powder; mp = 222-224 °C; IR  $\text{cm}^{-1}$ : 777, 1362, 1636, 1684, 2342, 2360, 2957;  $^1\text{H}$  NMR (400 MHz,  $\text{DMSO-}d_6$ )  $\delta$  0.57 (s, 3H,  $\text{CH}_3$ ), 1.00 (s, 3H,  $\text{CH}_3$ ), 1.97 (d,  $J = 16.4$  Hz, 1H, H-CH), 2.17-2.36 (m, 2H,  $\text{CH}_2$ ), 2.88 (d,  $J = 17.5$  Hz, 1H, H-CH), 3.35 (s, 3H,  $\text{CH}_3$ ), 7.59-7.73 (m, 5H, arom), 8.13 (dd,  $J_1 = 8.1$  Hz,  $J_2 = 1.2$  Hz, 1H, arom), 8.16 (dd,  $J_1 = 7.8$  Hz,  $J_2 = 1.8$  Hz, 1H, arom);  $^{13}\text{C}$  NMR (100 MHz,  $\text{DMSO-}d_6$ )  $\delta$  26.8, 28.0, 33.2, 33.6, 50.3, 126.4, 127.1, 127.3, 127.8, 129.1, 130.6, 132.4, 132.9, 134.8, 135.3, 137.1, 153.5, 167.6, 196.1, 197.6. HRMS (ESI) calcd for  $\text{C}_{21}\text{H}_{19}\text{NO}_3$   $[\text{M}+\text{H}]^+$ : 334.1443; found: 334.1439.

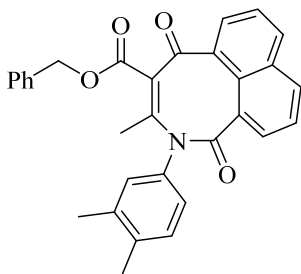

Benzyl (E)-2-(3,4-dimethylphenyl)-3-methyl-1,5-dioxo-2,5-dihydro-1H-naphtho[1,8-cd]azocine-4-carboxylate (**3r**): isolated yield = 94%; white powder; mp >230 °C; IR  $\text{cm}^{-1}$ : 778, 818, 1224, 1251, 1509, 1644, 1658, 1686, 1719, 2341, 2360, 2956, 3006; The  $^1\text{H}$  NMR (400 MHz,  $\text{DMSO-}d_6$ ) spectra of this compound shows the existence of two of diastereomers (conformers) which their ratio was calculated from the integrals of the relative peaks as 1:0.2;  $\delta$  1.91 (s, 0.59H,  $\text{CH}_3$  of minor conformer), 2.12 (s, 3H,  $\text{CH}_3$  of major conformer), 2.14 (s, 1.2H,  $2^*\text{CH}_3$  of minor conformer), 2.28 (s, 3H,  $\text{CH}_3$  of major conformer), 2.30 (s, 3H,  $\text{CH}_3$  of major conformer), 4.92 (d,  $J = 12.4$  Hz, 1H, H-CH of major conformer), 4.99 (d,  $J = 12.4$  Hz, 1H,  $\text{CH}_2$  of major conformer), 5.19 (s, 0.42H,  $\text{CH}_2$  of minor conformer), 6.19 (dd,  $J_1 = 8.0$  Hz,  $J_2 = 2.0$  Hz, 0.21H, arom), 6.28 (d,  $J = 2.0$  Hz, 0.21H, arom), 6.93-7.08 (m, 2.12H, arom), 7.09-7.17 (m, 0.49H, arom), 7.18-7.45 (m, 6.65H, arom), 7.53-7.64 (m, 2H, arom), 7.74 (t,  $J = 8.0$  Hz, 1H, arom), 7.84-8.02 (m, 1.59H, arom), 8.14-8.27 (m, 2H, arom), 8.37 (dd,  $J_1 = 7.2$  Hz,  $J_2 = 1.2$  Hz, 0.53H, arom), 8.52 (dd,  $J_1 = 8.4$  Hz,  $J_2 = 1.2$  Hz, 0.53H, arom);  $^{13}\text{C}$  NMR (100 MHz,  $\text{DMSO-}d_6$ )  $\delta$  18.2, 18.7, 19.2, 19.6, 19.8, 19.9, 66.8, 67.7, 85.3, 116.4, 120.3, 124.8, 126.4, 127.3, 127.4, 127.5, 127.8, 127.9, 128.3, 128.4, 128.5, 128.5, 128.6, 128.6, 128.7, 128.8, 129.0, 130.4, 130.5, 130.7, 130.8, 131.1, 132.2, 132.4, 132.6, 133.0, 134.8, 135.4, 135.6, 135.7, 135.8, 136.2, 137.3, 137.4, 138.0, 147.3, 149.5, 161.9, 165.5, 166.2, 167.1, 189.8, 196.7. HRMS (ESI) calcd for  $\text{C}_{31}\text{H}_{25}\text{NO}_4$   $[\text{M}+\text{H}]^+$ : 476.1784; found: (No expected molecular ion was observed).

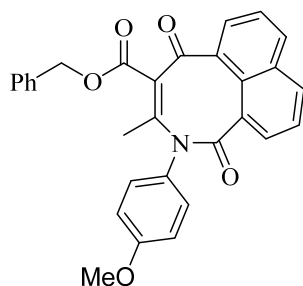

Benzyl(E)-2-(4-methoxyphenyl)-3-methyl-1,5-dioxo-2,5-dihydro-1H-naphtho[1,8-cd]azocine-4-carboxylate (**3s**): isolated yield = 92%; white powder; mp >230 °C; IR  $\text{cm}^{-1}$ : 778, 818, 1061, 1224, 1251, 1509, 1644, 1648, 1686, 1719, 2360, 2956, 3033; The  $^1\text{H}$  NMR (400 MHz,  $\text{DMSO-}d_6$ ) spectra of this compound shows the existence of two of diastereomers (conformers) which their ratio was

calculated from the integrals of the relative peaks as 1:0.2;  $\delta$  1.94 (s, 0.6H, CH<sub>3</sub> of minor conformer), 2.12 (s, 3H, CH<sub>3</sub> of major conformer), 3.70 (s, 0.6H, OCH<sub>3</sub> of minor conformer), 3.82 (s, 3H, CH<sub>3</sub>, OCH<sub>3</sub> of major conformer), 4.93 (d,  $J$  = 12.4 Hz, 1H, CH<sub>2</sub> of major conformer), 5.00 (d,  $J$  = 12.4 Hz, 1H, CH<sub>2</sub> of major conformer), 5.19 (s, 0.4 H, CH<sub>2</sub> of minor conformer), 6.45 (dd,  $J_1$ = 6.6 Hz,  $J_2$ =2.0 Hz, 0.4H, arom), 6.86 (dd,  $J_1$ = 6.8 Hz,  $J_2$ =2.0 Hz, 0.4H, arom), 6.93-7.00 (m, 2H, arom), 7.08-7.18 (m, 2.42H, arom), 7.23-7.27 (m, 0.6H, arom), 7.28-7.36 (m, 3H, arom), 7.41-7.48 (m, 2.H, arom), 7.56 (d,  $J$ =7.6 Hz, 1H, arom), 7.59 (d,  $J$ = 7.2 Hz, 1H, arom), 7.4 (t,  $J$ = 7.2 Hz, 1H, arom), 7.86-7.92 (m+dd,  $J_1$ = 7.2 Hz,  $J_2$ =0.8 Hz, 1.4H, arom), 8.14-8.24 (m, 2H, arom), 8.37 (dd,  $J_1$ = 7.2 Hz,  $J_2$ = 1.2 Hz, 0.4H, arom), 8.52 (dd,  $J_1$ = 8.0 Hz,  $J_2$ = 1.2 Hz, 0.4H, arom); <sup>13</sup>C NMR (100 MHz, DMSO-*d*<sub>6</sub>)  $\delta$  18.1, 18.7, 55.6, 55.9, 66.8, 67.6, 114.7, 115.2, 120.9, 126.4, 127.3, 127.8, 127.4, 127.5, 127.8, 128.3, 128.4, 128.5, 128.6, 128.7, 128.8, 128.8, 128.9, 129.0, 130.5, 130.6, 131.0, 132.4, 132.6, 133.0, 134.7, 135.4, 135.6, 135.7, 142.3, 149.5, 156.5, 159.4, 161.9, 165.6, 166.4, 167.2, 189.8, 196.8. HRMS (ESI) calcd for C<sub>30</sub>H<sub>23</sub>NO<sub>5</sub> [M+H]<sup>+</sup>: 478.1674; found: 478.1574.

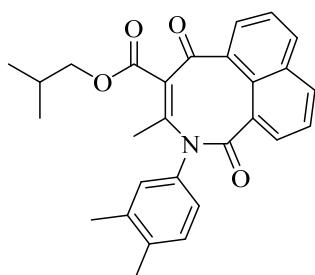

Isobutyl (E)-2-(3,4-dimethylphenyl)-3-methyl-1,5-dioxo-2,5-dihydro-1H-naphtho[1,8-cd]azocine-4-carboxylate (**3t**): isolated yield = 90%; white powder; mp >230 °C; IR cm<sup>-1</sup>: 780, 1064, 1233, 1324, 1501, 1644, 1661, 1686, 1717, 2360, 2890, 2962; The <sup>1</sup>H NMR (400 MHz, DMSO-*d*<sub>6</sub>) spectra of this compound shows the existence of two of diastereomers (conformers) which their ratio was calculated from the integrals of the relative peaks as 1:0.2;  $\delta$  0.60 (d,  $J$  = 6.8 Hz, 3H, CH<sub>3</sub> of major conformer), 0.66-0.80 (m+d,  $J$  = 6.8 Hz, 3.5H, CH<sub>3</sub> of major and minor conformers), 1.65 (two overlapped septets,  $J$ = 6.8 Hz, 1.11H, CH of major and minor conformers), 1.90 (s, 0.33H, CH<sub>3</sub> of minor conformer), 2.12 (s, 3H, CH<sub>3</sub> of major conformer), 2.14 (s, 0.6H, CH<sub>3</sub> of minor conformer), 2.28 (s, 3H, CH<sub>3</sub> of major

conformer), 2.30 (s, 3H, CH<sub>3</sub> of major conformer), 3.60-3.74 (m, 2H, CH<sub>2</sub> of major conformer), 3.88 (d, J= 6.0 Hz, CH<sub>2</sub> of minor conformer), 6.20 (d, J= 7.6 Hz, 0.11H, arom), 6.3 (s, 0.11H, arom), 7.03 (s, 0.11H, arom), 7.11-7.45 (m, 3H, arom), 7.68-7.93 (m, 4H, arom), 8.18 (d, J= 8.4 Hz, 1H, arom), 8.21 (d, J= 7.6 Hz, 1H, arom), 8.38 (d, J= 7.6 Hz, 0.33H, arom), 8.52 (d, J= 8.4 Hz, 0.33H, arom); <sup>13</sup>C NMR (100 MHz, DMSO-*d*<sub>6</sub>) δ 19.1, 19.2, 19.4, 20.1, 24.4, 27.8, 28.0, 30.7, 71.6, 107.3, 117.0, 120.7, 126.8, 127.5, 129.6, 129.9, 131.1, 131.9, 135.1, 136.6, 137.5, 168.4, 170.9. HRMS (ESI) calcd for C<sub>28</sub>H<sub>27</sub>NO<sub>4</sub> [M+H]<sup>+</sup>: 442.1940; found: (No expected molecular ion was observed).

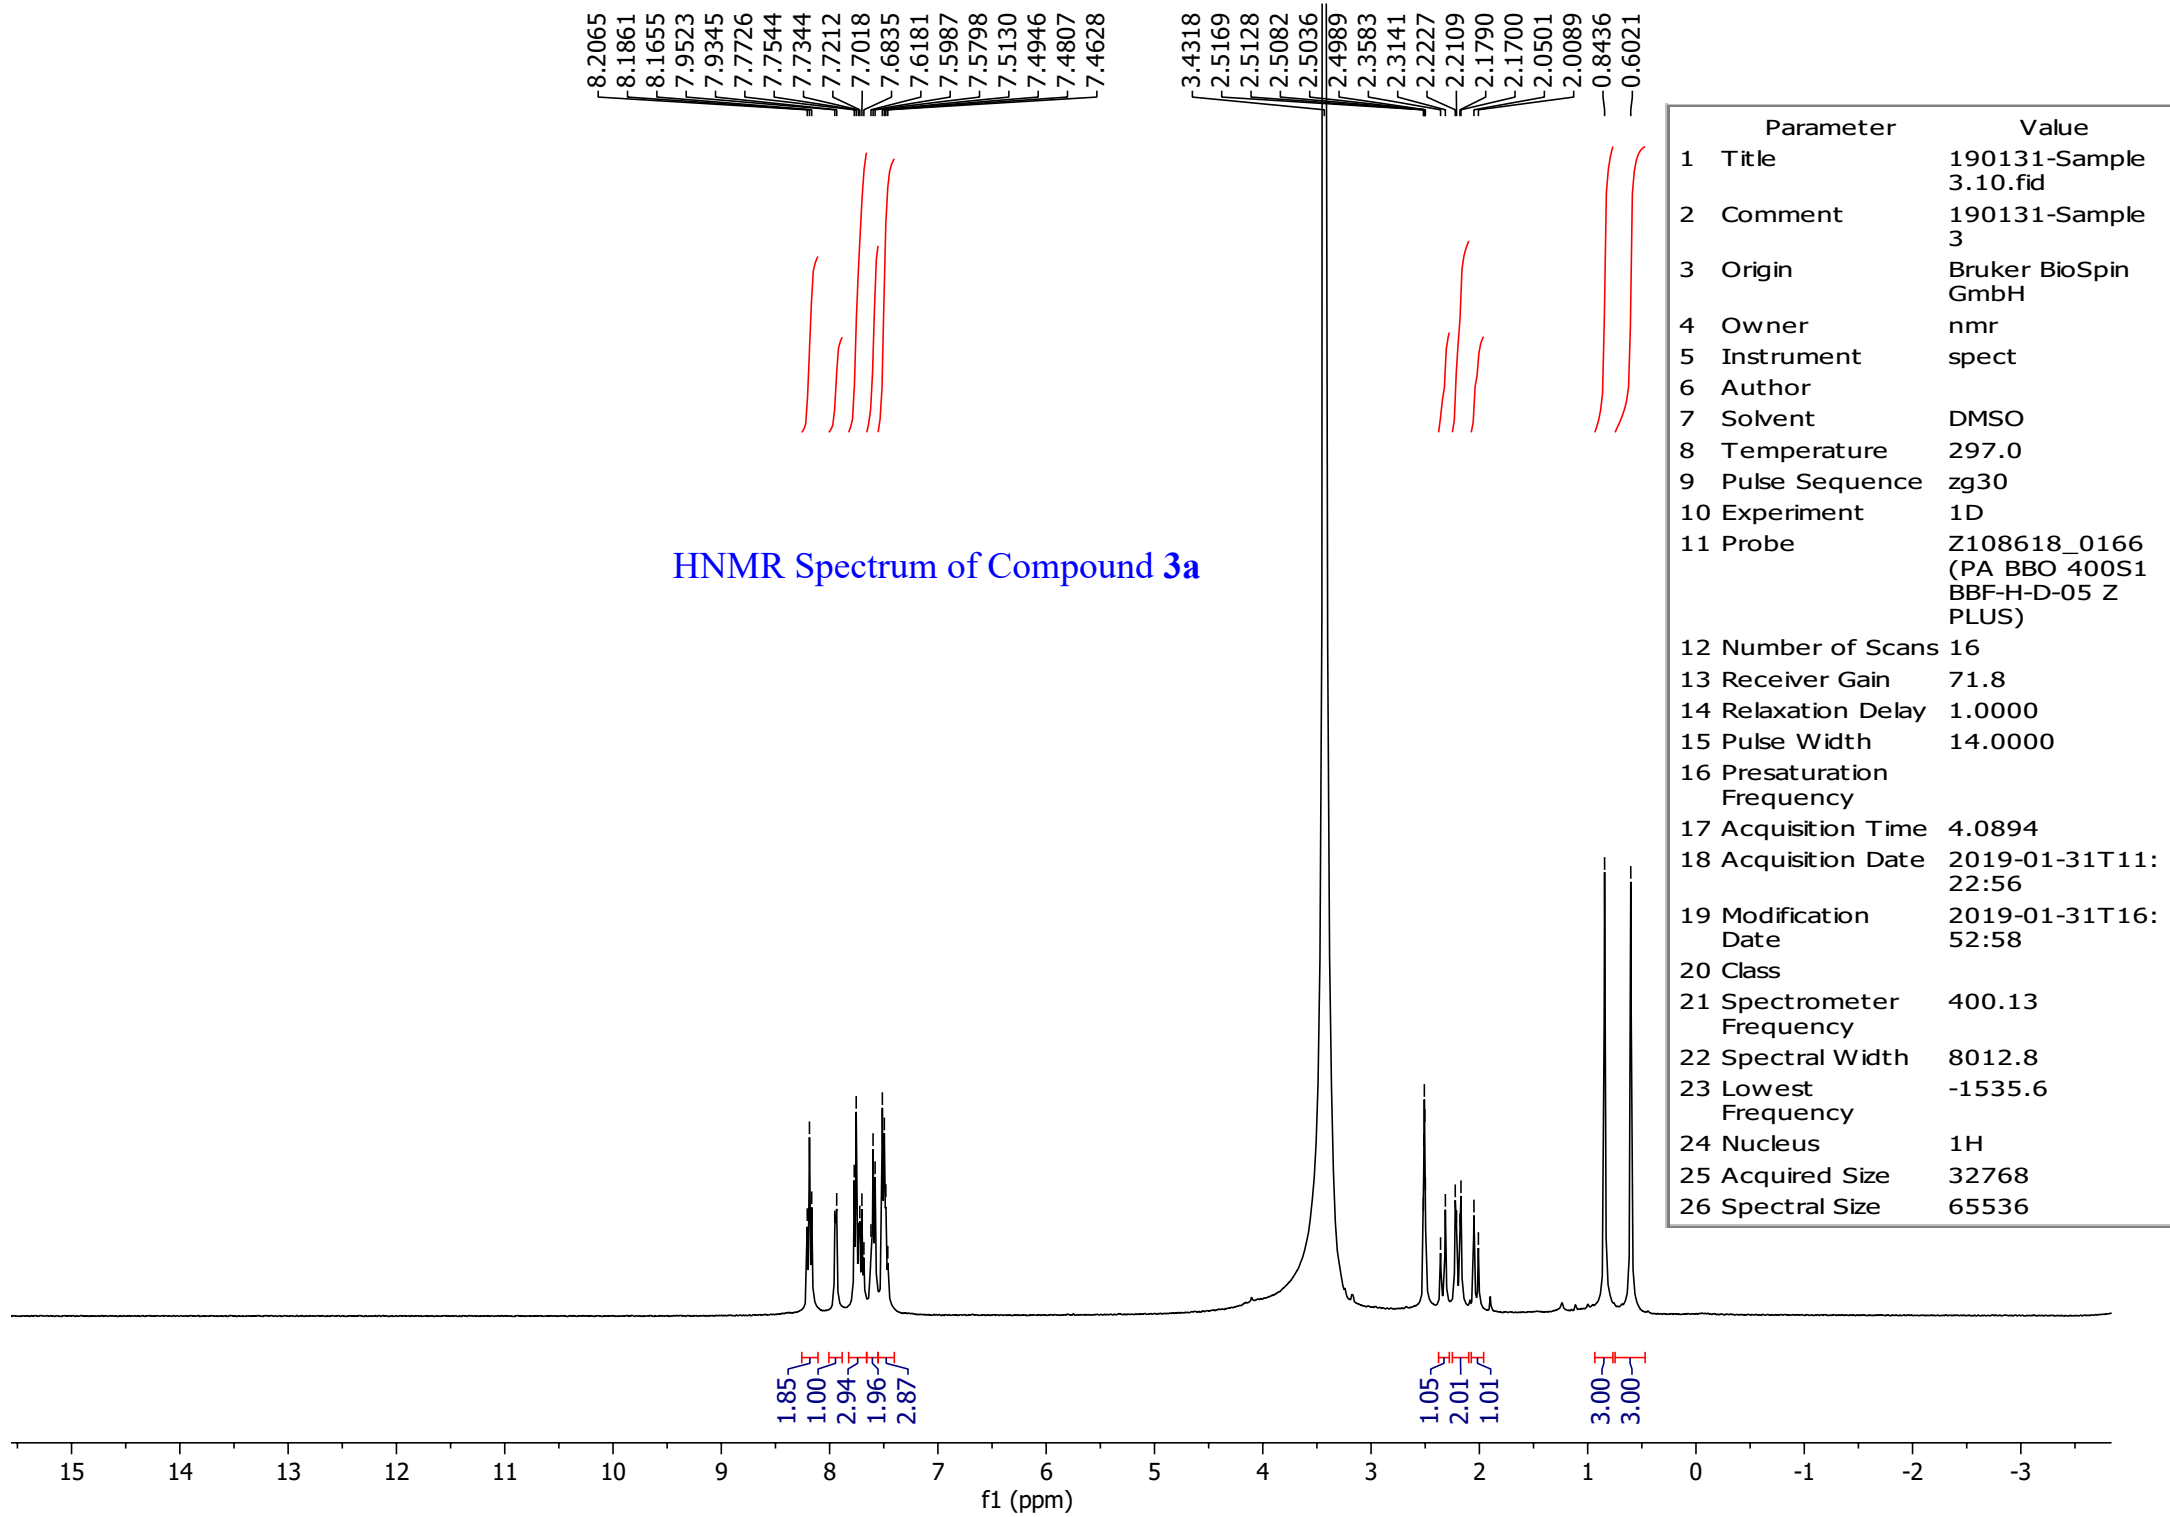



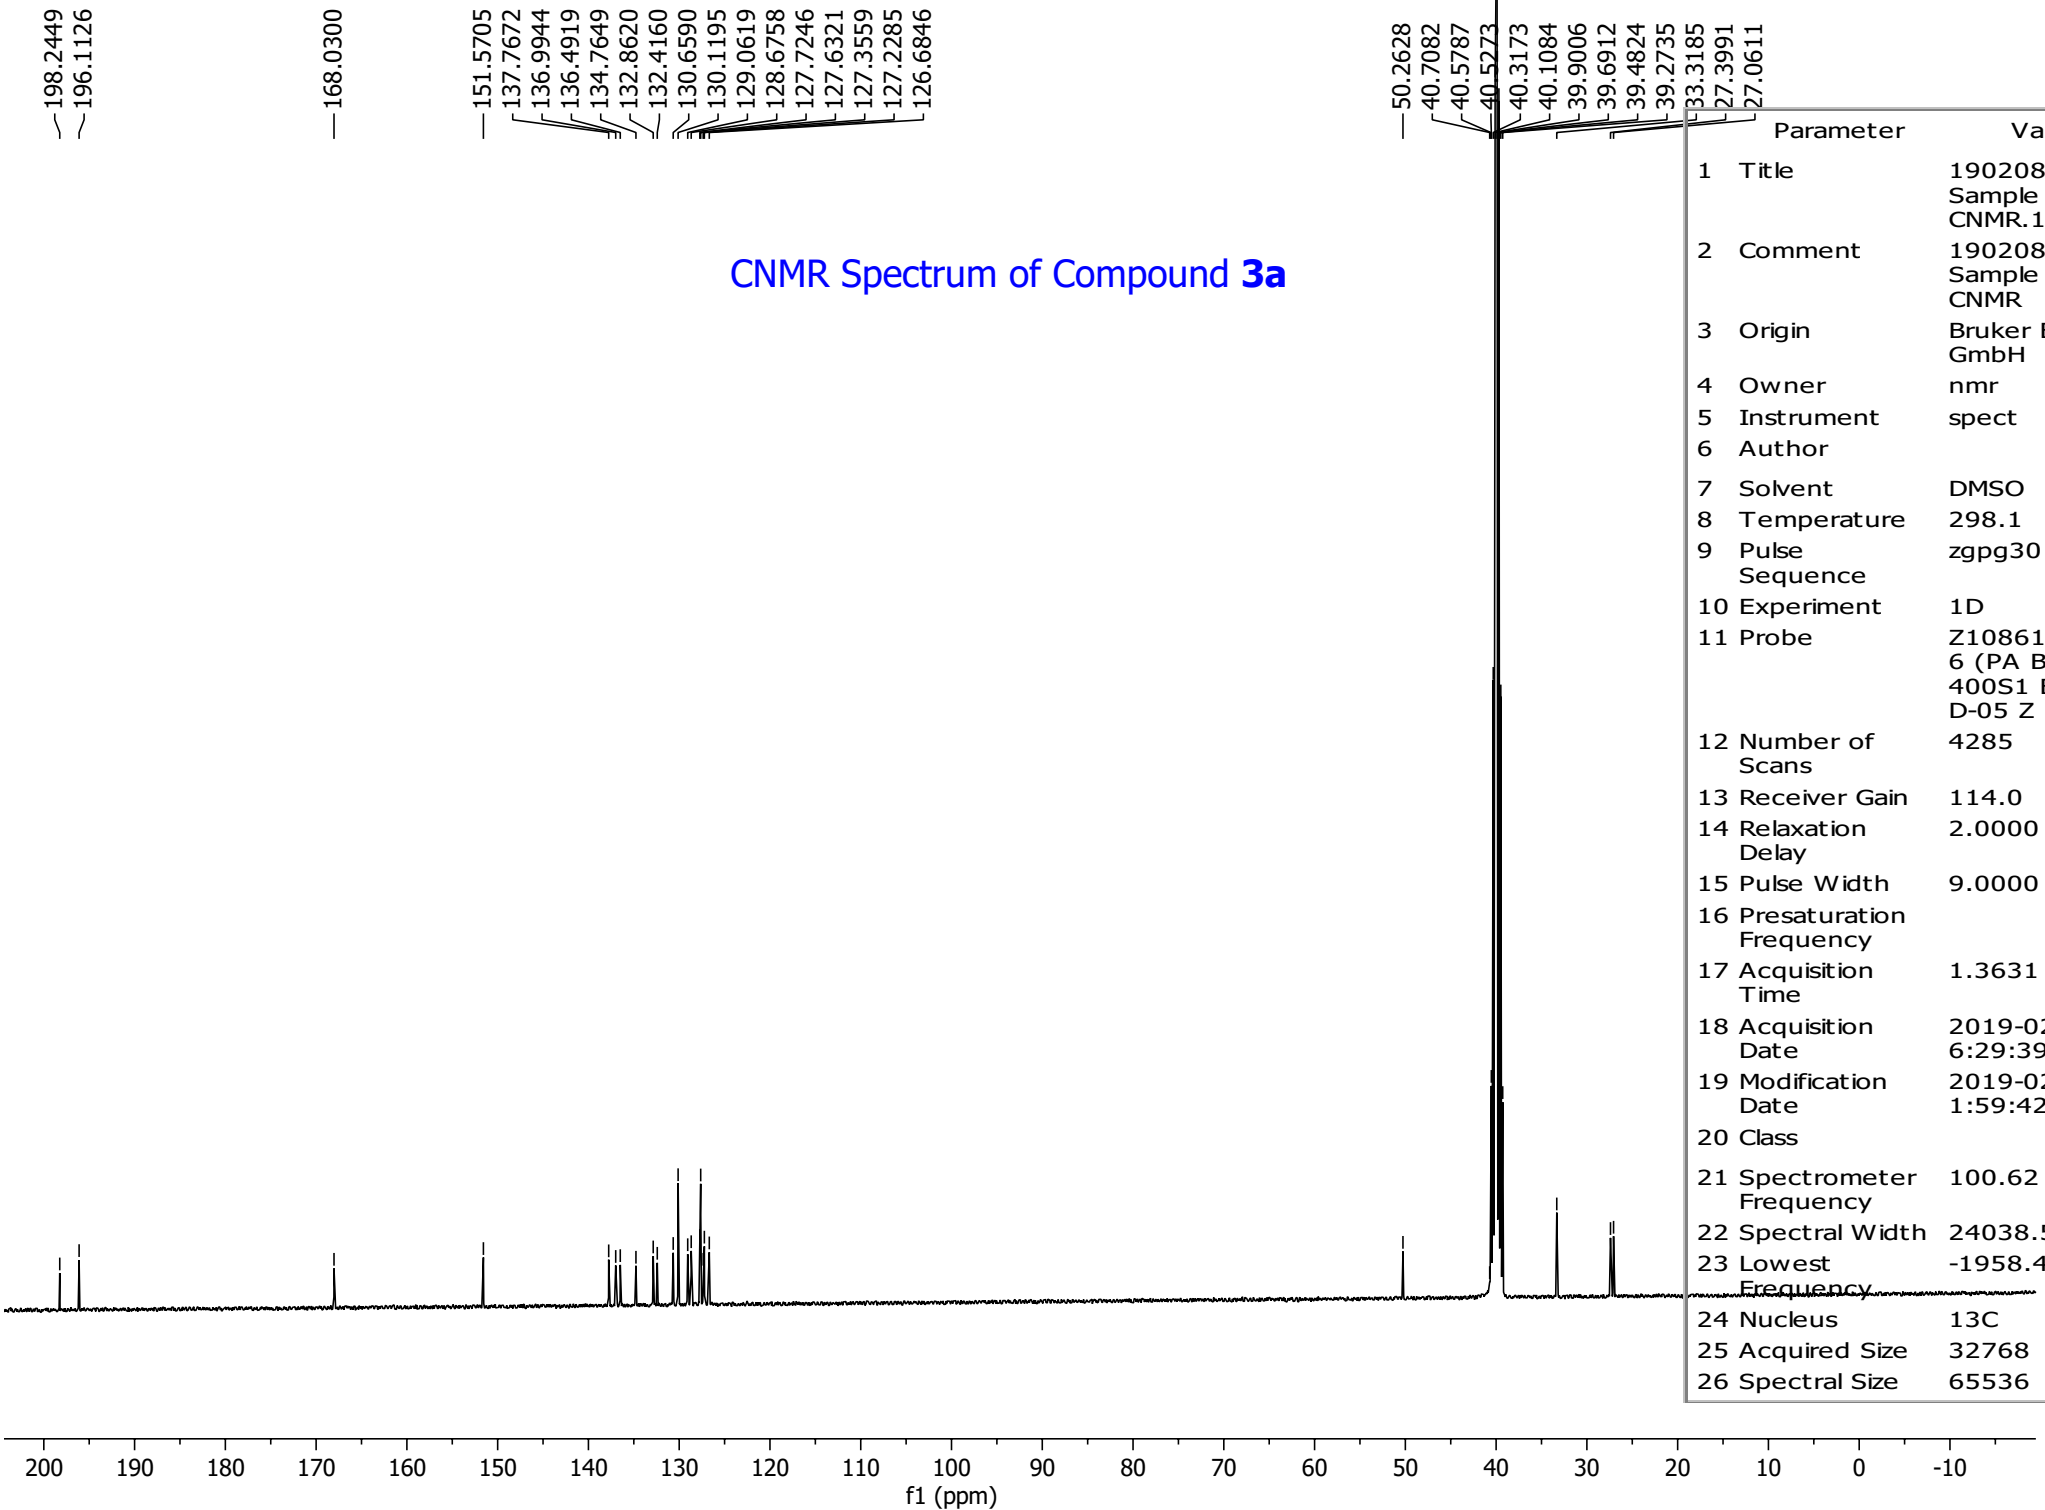

### CNMR Spectrum of Compound 3a

| Parameter                  | Value                                          |
|----------------------------|------------------------------------------------|
| 1 Title                    | 190208-Sample 3-CNMR.10.fid                    |
| 2 Comment                  | 190208-Sample 3-CNMR                           |
| 3 Origin                   | Bruker BioSpin GmbH                            |
| 4 Owner                    | nmr                                            |
| 5 Instrument               | spect                                          |
| 6 Author                   |                                                |
| 7 Solvent                  | DMSO                                           |
| 8 Temperature              | 298.1                                          |
| 9 Pulse Sequence           | zgpg30                                         |
| 10 Experiment              | 1D                                             |
| 11 Probe                   | Z108618_016 6 (PA BBO 400S1 BBF-H-D-05 Z PLUS) |
| 12 Number of Scans         | 4285                                           |
| 13 Receiver Gain           | 114.0                                          |
| 14 Relaxation Delay        | 2.0000                                         |
| 15 Pulse Width             | 9.0000                                         |
| 16 Presaturation Frequency |                                                |
| 17 Acquisition Time        | 1.3631                                         |
| 18 Acquisition Date        | 2019-02-08T16:29:39                            |
| 19 Modification Date       | 2019-02-08T21:59:42                            |
| 20 Class                   |                                                |
| 21 Spectrometer Frequency  | 100.62                                         |
| 22 Spectral Width          | 24038.5                                        |
| 23 Lowest Frequency        | -1958.4                                        |
| 24 Nucleus                 | 13C                                            |
| 25 Acquired Size           | 32768                                          |
| 26 Spectral Size           | 65536                                          |

8.2002  
8.1788  
8.1571  
7.9258  
7.9086  
7.7623  
7.7445  
7.7234  
7.7166  
7.6969  
7.6790  
7.4213  
7.4002  
7.1483  
7.1270

3.8312  
3.4301  
2.5096  
2.3532  
2.3091  
2.2309  
2.1897  
2.1508  
2.0467  
2.0055  
-0.8439  
-0.6156

HNMR Spectrum of Compound **3b**

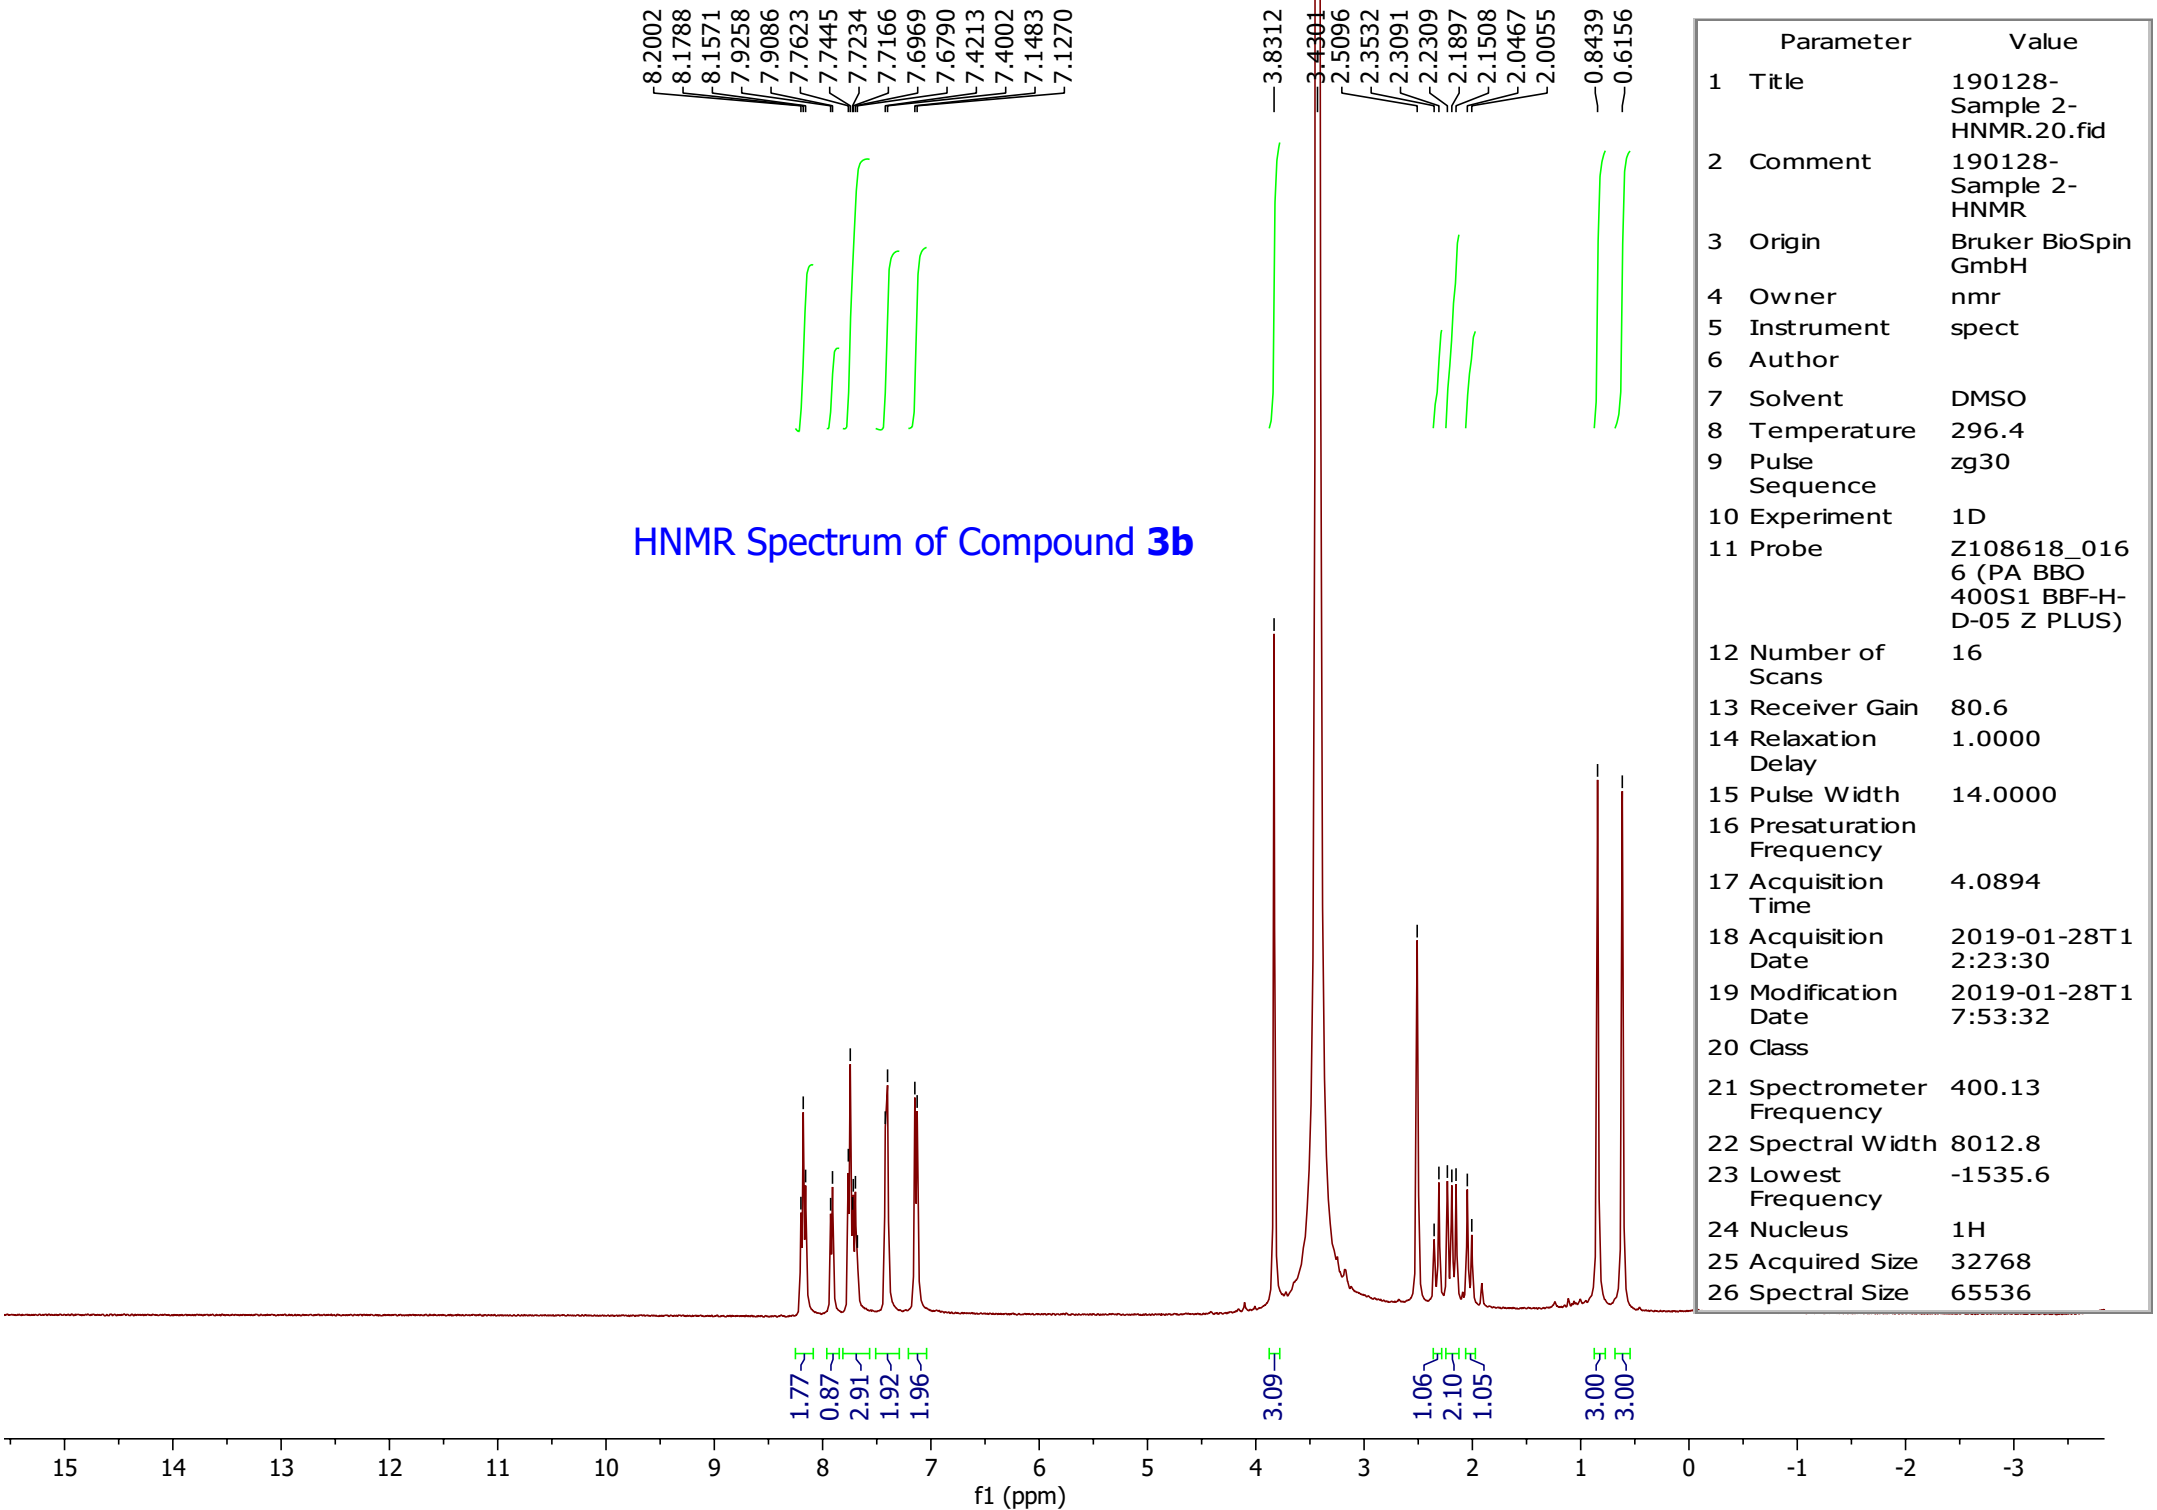

| Parameter                  | Value                                          |
|----------------------------|------------------------------------------------|
| 1 Title                    | 190128-Sample 2-HNMR.20.fid                    |
| 2 Comment                  | 190128-Sample 2-HNMR                           |
| 3 Origin                   | Bruker BioSpin GmbH                            |
| 4 Owner                    | nmr                                            |
| 5 Instrument               | spect                                          |
| 6 Author                   |                                                |
| 7 Solvent                  | DMSO                                           |
| 8 Temperature              | 296.4                                          |
| 9 Pulse Sequence           | zg30                                           |
| 10 Experiment              | 1D                                             |
| 11 Probe                   | Z108618_016 6 (PA BBO 400S1 BBF-H-D-05 Z PLUS) |
| 12 Number of Scans         | 16                                             |
| 13 Receiver Gain           | 80.6                                           |
| 14 Relaxation Delay        | 1.0000                                         |
| 15 Pulse Width             | 14.0000                                        |
| 16 Presaturation Frequency |                                                |
| 17 Acquisition Time        | 4.0894                                         |
| 18 Acquisition Date        | 2019-01-28T12:23:30                            |
| 19 Modification Date       | 2019-01-28T17:53:32                            |
| 20 Class                   |                                                |
| 21 Spectrometer Frequency  | 400.13                                         |
| 22 Spectral Width          | 8012.8                                         |
| 23 Lowest Frequency        | -1535.6                                        |
| 24 Nucleus                 | 1H                                             |
| 25 Acquired Size           | 32768                                          |
| 26 Spectral Size           | 65536                                          |

~198.3947  
~196.1221

—168.1231

—159.5589

—151.8218

137.0322  
136.0153  
134.8455  
132.8121  
132.3829  
130.5844  
130.2023  
128.9074  
128.7109  
127.6236  
127.3544  
127.1968  
126.6300  
115.2823

—55.9419

—50.2794

—33.2851

└27.4461  
└27.0296

### CNMR Spectrum of Compound **3b**

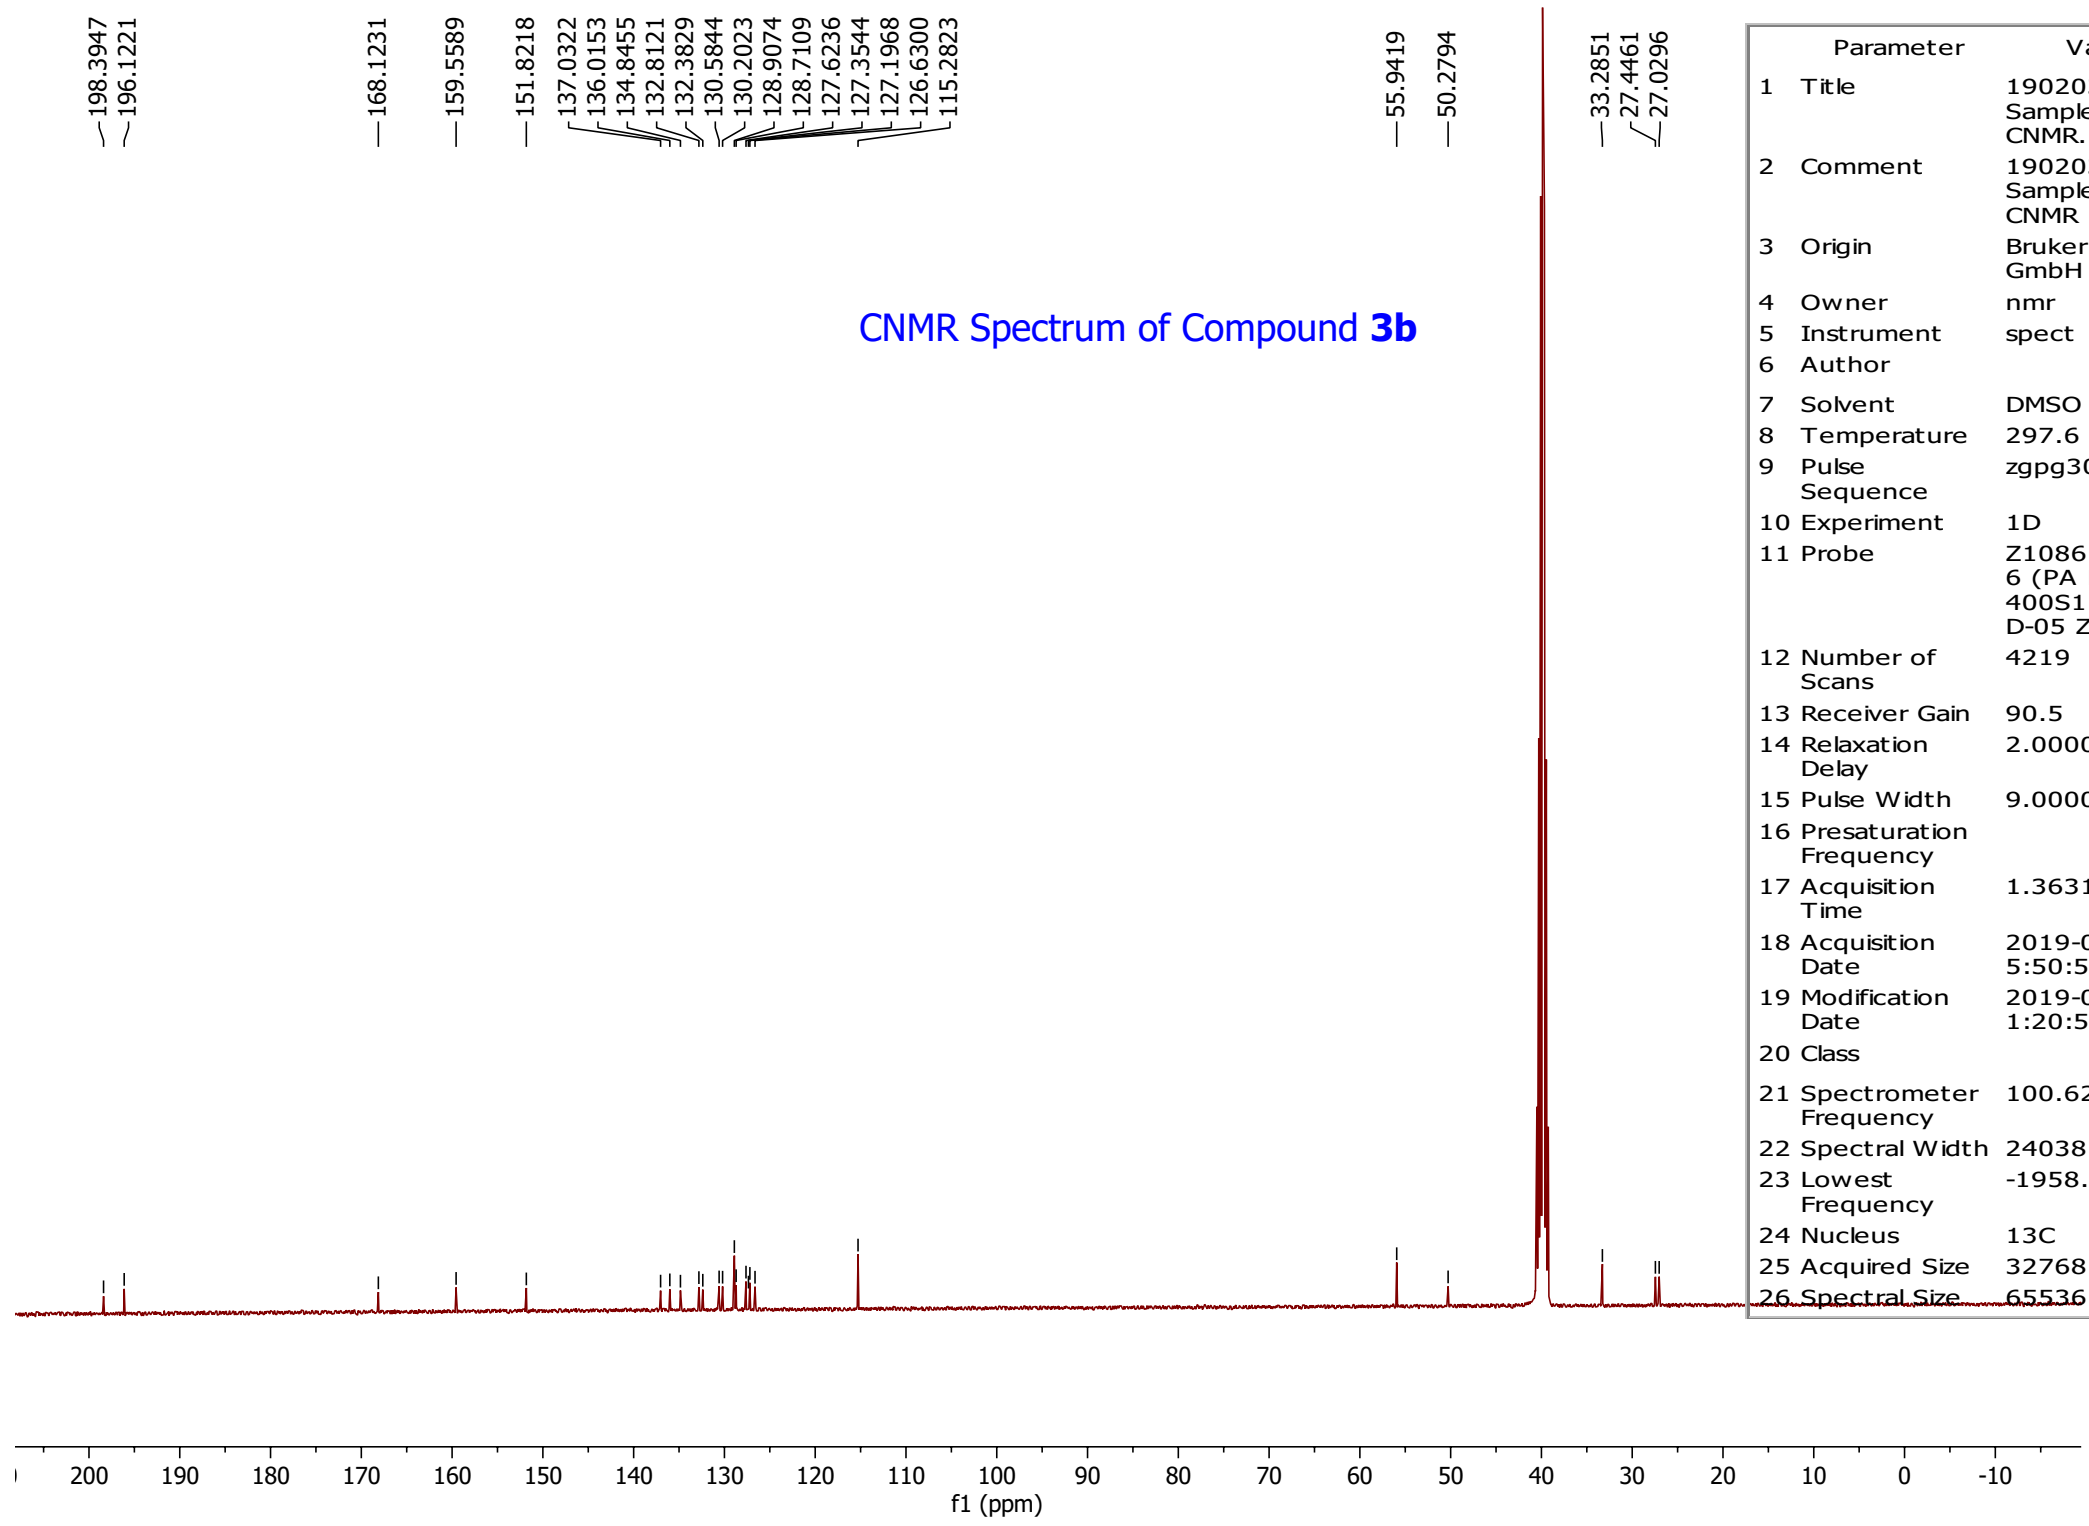

| Parameter                  | Value                                          |
|----------------------------|------------------------------------------------|
| 1 Title                    | 190203-Sample 2-CNMR.10.fid                    |
| 2 Comment                  | 190203-Sample 2-CNMR                           |
| 3 Origin                   | Bruker BioSpin GmbH                            |
| 4 Owner                    | nmr                                            |
| 5 Instrument               | spect                                          |
| 6 Author                   |                                                |
| 7 Solvent                  | DMSO                                           |
| 8 Temperature              | 297.6                                          |
| 9 Pulse Sequence           | zgpg30                                         |
| 10 Experiment              | 1D                                             |
| 11 Probe                   | Z108618_016 6 (PA BBO 400S1 BBF-H-D-05 Z PLUS) |
| 12 Number of Scans         | 4219                                           |
| 13 Receiver Gain           | 90.5                                           |
| 14 Relaxation Delay        | 2.0000                                         |
| 15 Pulse Width             | 9.0000                                         |
| 16 Presaturation Frequency |                                                |
| 17 Acquisition Time        | 1.3631                                         |
| 18 Acquisition Date        | 2019-02-03T15:50:55                            |
| 19 Modification Date       | 2019-02-03T21:20:58                            |
| 20 Class                   |                                                |
| 21 Spectrometer Frequency  | 100.62                                         |
| 22 Spectral Width          | 24038.5                                        |
| 23 Lowest Frequency        | -1958.4                                        |
| 24 Nucleus                 | 13C                                            |
| 25 Acquired Size           | 32768                                          |
| 26 Spectral Size           | 65536                                          |

8.2028  
8.1817  
8.1606  
7.9717  
7.9543  
7.7660  
7.7480  
7.7287  
7.7182  
7.6988  
7.6806  
7.5239  
7.5041  
7.4847  
7.0913  
7.0853  
7.0806  
7.0623  
7.0449

3.8416  
3.4275  
2.5072  
2.3756  
2.3313  
2.2428  
2.2013  
2.1627  
2.0517  
2.0106  
0.8501  
0.6169

HNMR Spectrum of Compound **3c**

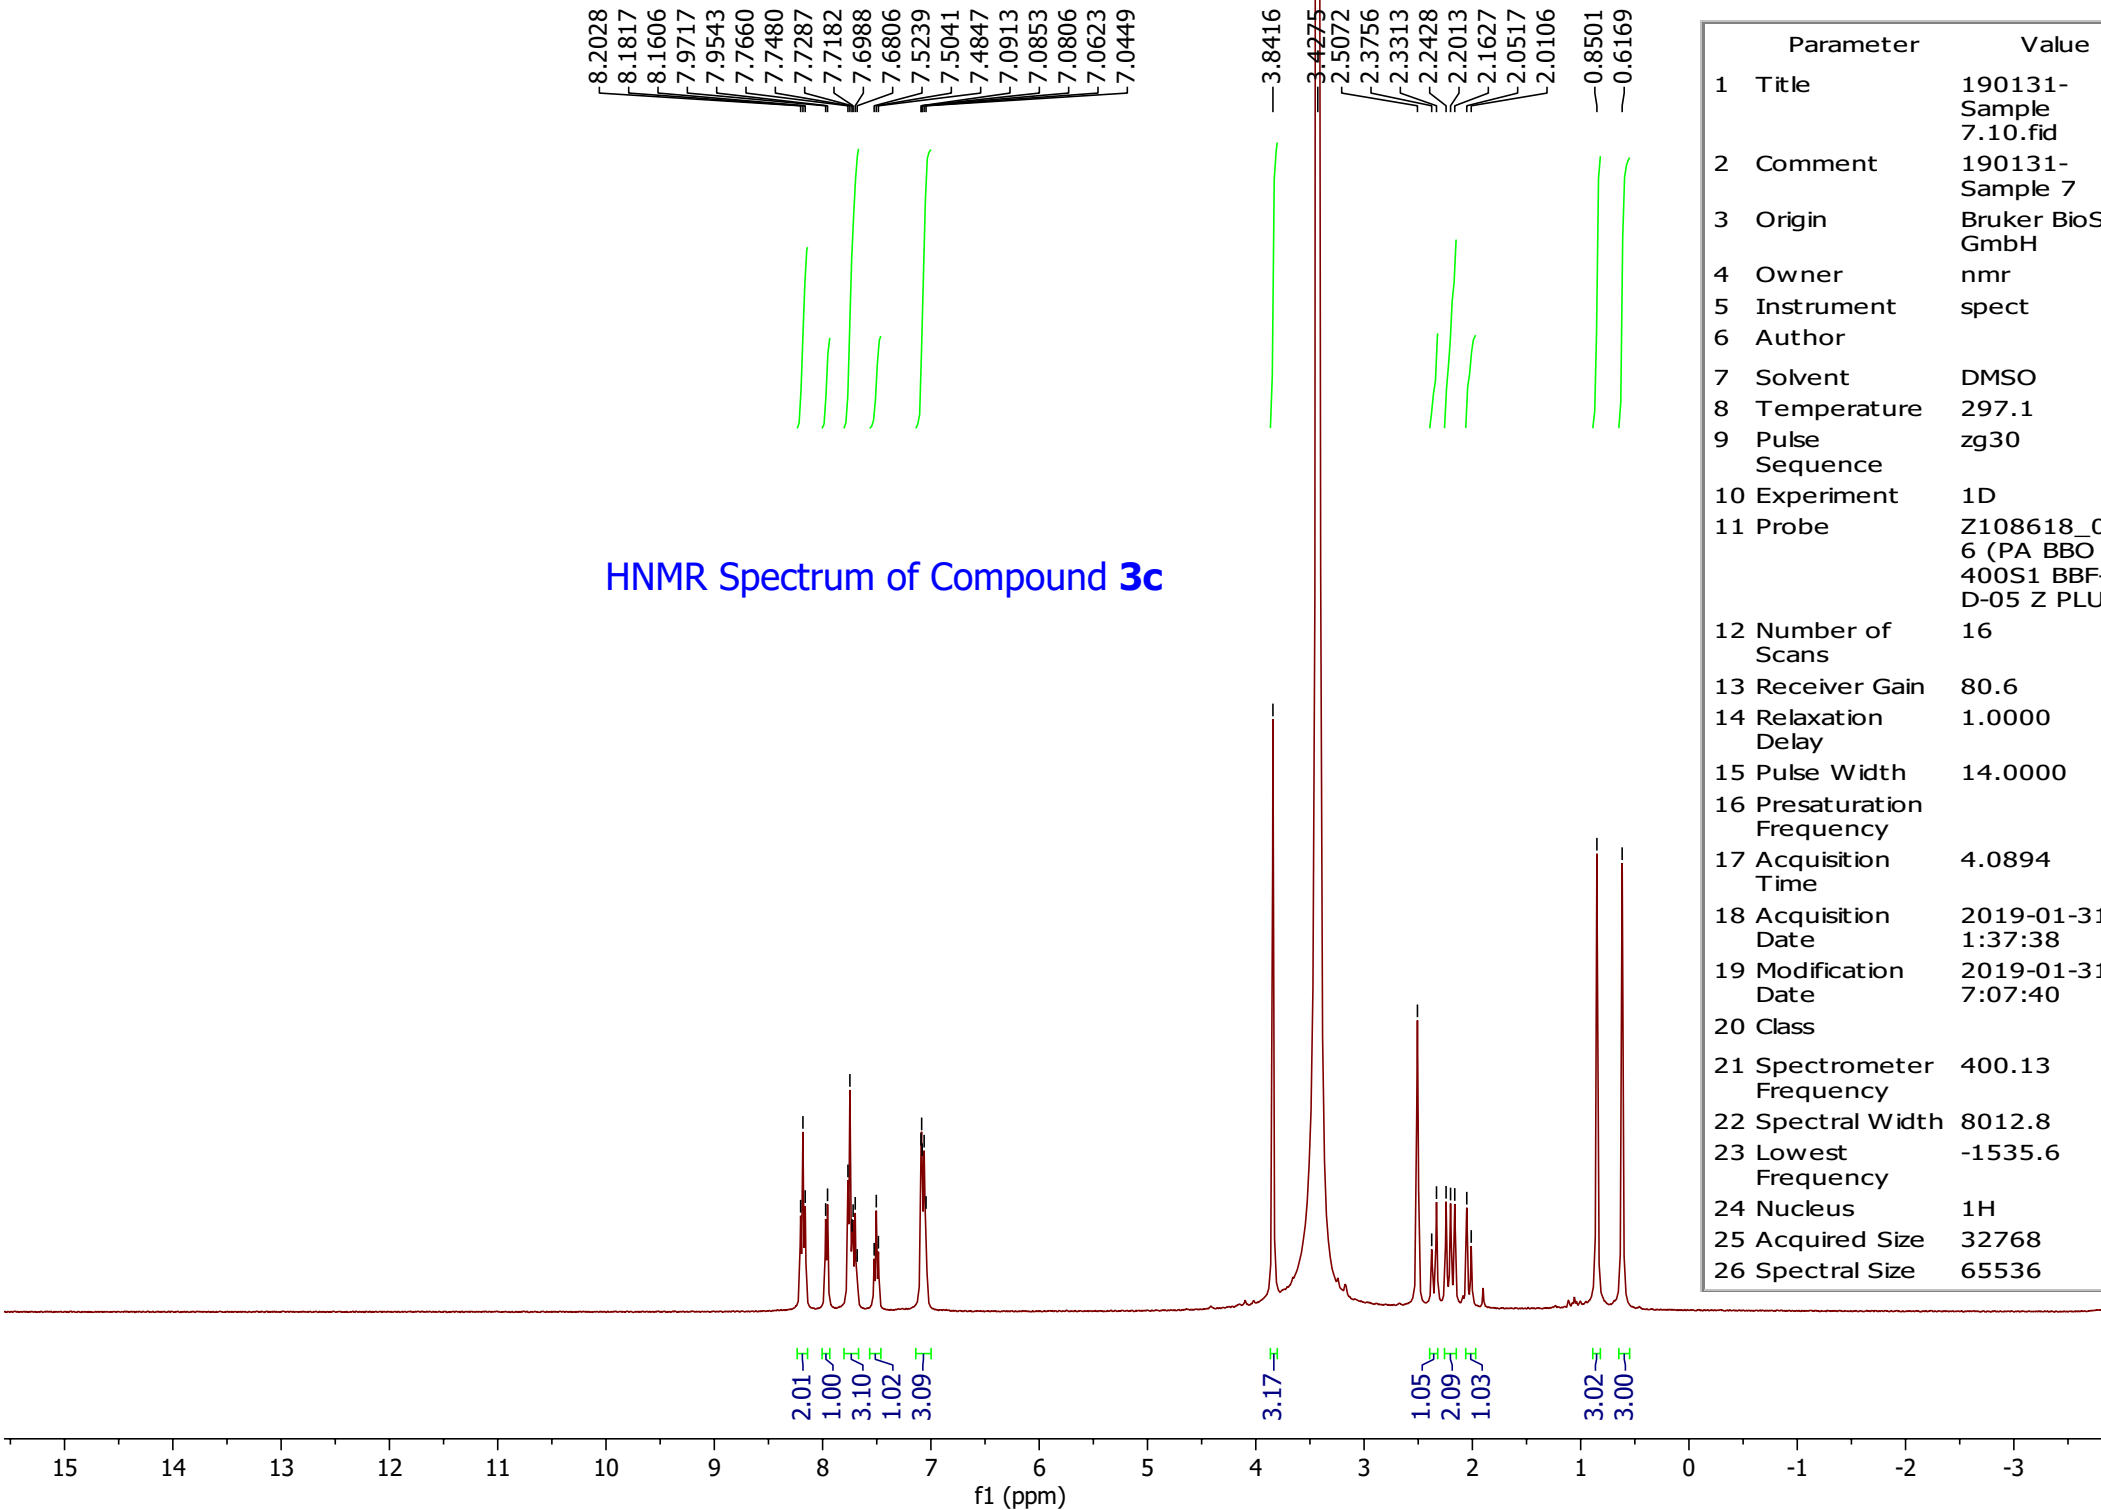

| Parameter                  | Value                                          |
|----------------------------|------------------------------------------------|
| 1 Title                    | 190131-Sample 7.10.fid                         |
| 2 Comment                  | 190131-Sample 7                                |
| 3 Origin                   | Bruker BioSpin GmbH                            |
| 4 Owner                    | nmr                                            |
| 5 Instrument               | spect                                          |
| 6 Author                   |                                                |
| 7 Solvent                  | DMSO                                           |
| 8 Temperature              | 297.1                                          |
| 9 Pulse Sequence           | zg30                                           |
| 10 Experiment              | 1D                                             |
| 11 Probe                   | Z108618_016 6 (PA BBO 400S1 BBF-H-D-05 Z PLUS) |
| 12 Number of Scans         | 16                                             |
| 13 Receiver Gain           | 80.6                                           |
| 14 Relaxation Delay        | 1.0000                                         |
| 15 Pulse Width             | 14.0000                                        |
| 16 Presaturation Frequency |                                                |
| 17 Acquisition Time        | 4.0894                                         |
| 18 Acquisition Date        | 2019-01-31T1 1:37:38                           |
| 19 Modification Date       | 2019-01-31T1 7:07:40                           |
| 20 Class                   |                                                |
| 21 Spectrometer Frequency  | 400.13                                         |
| 22 Spectral Width          | 8012.8                                         |
| 23 Lowest Frequency        | -1535.6                                        |
| 24 Nucleus                 | 1H                                             |
| 25 Acquired Size           | 32768                                          |
| 26 Spectral Size           | 65536                                          |

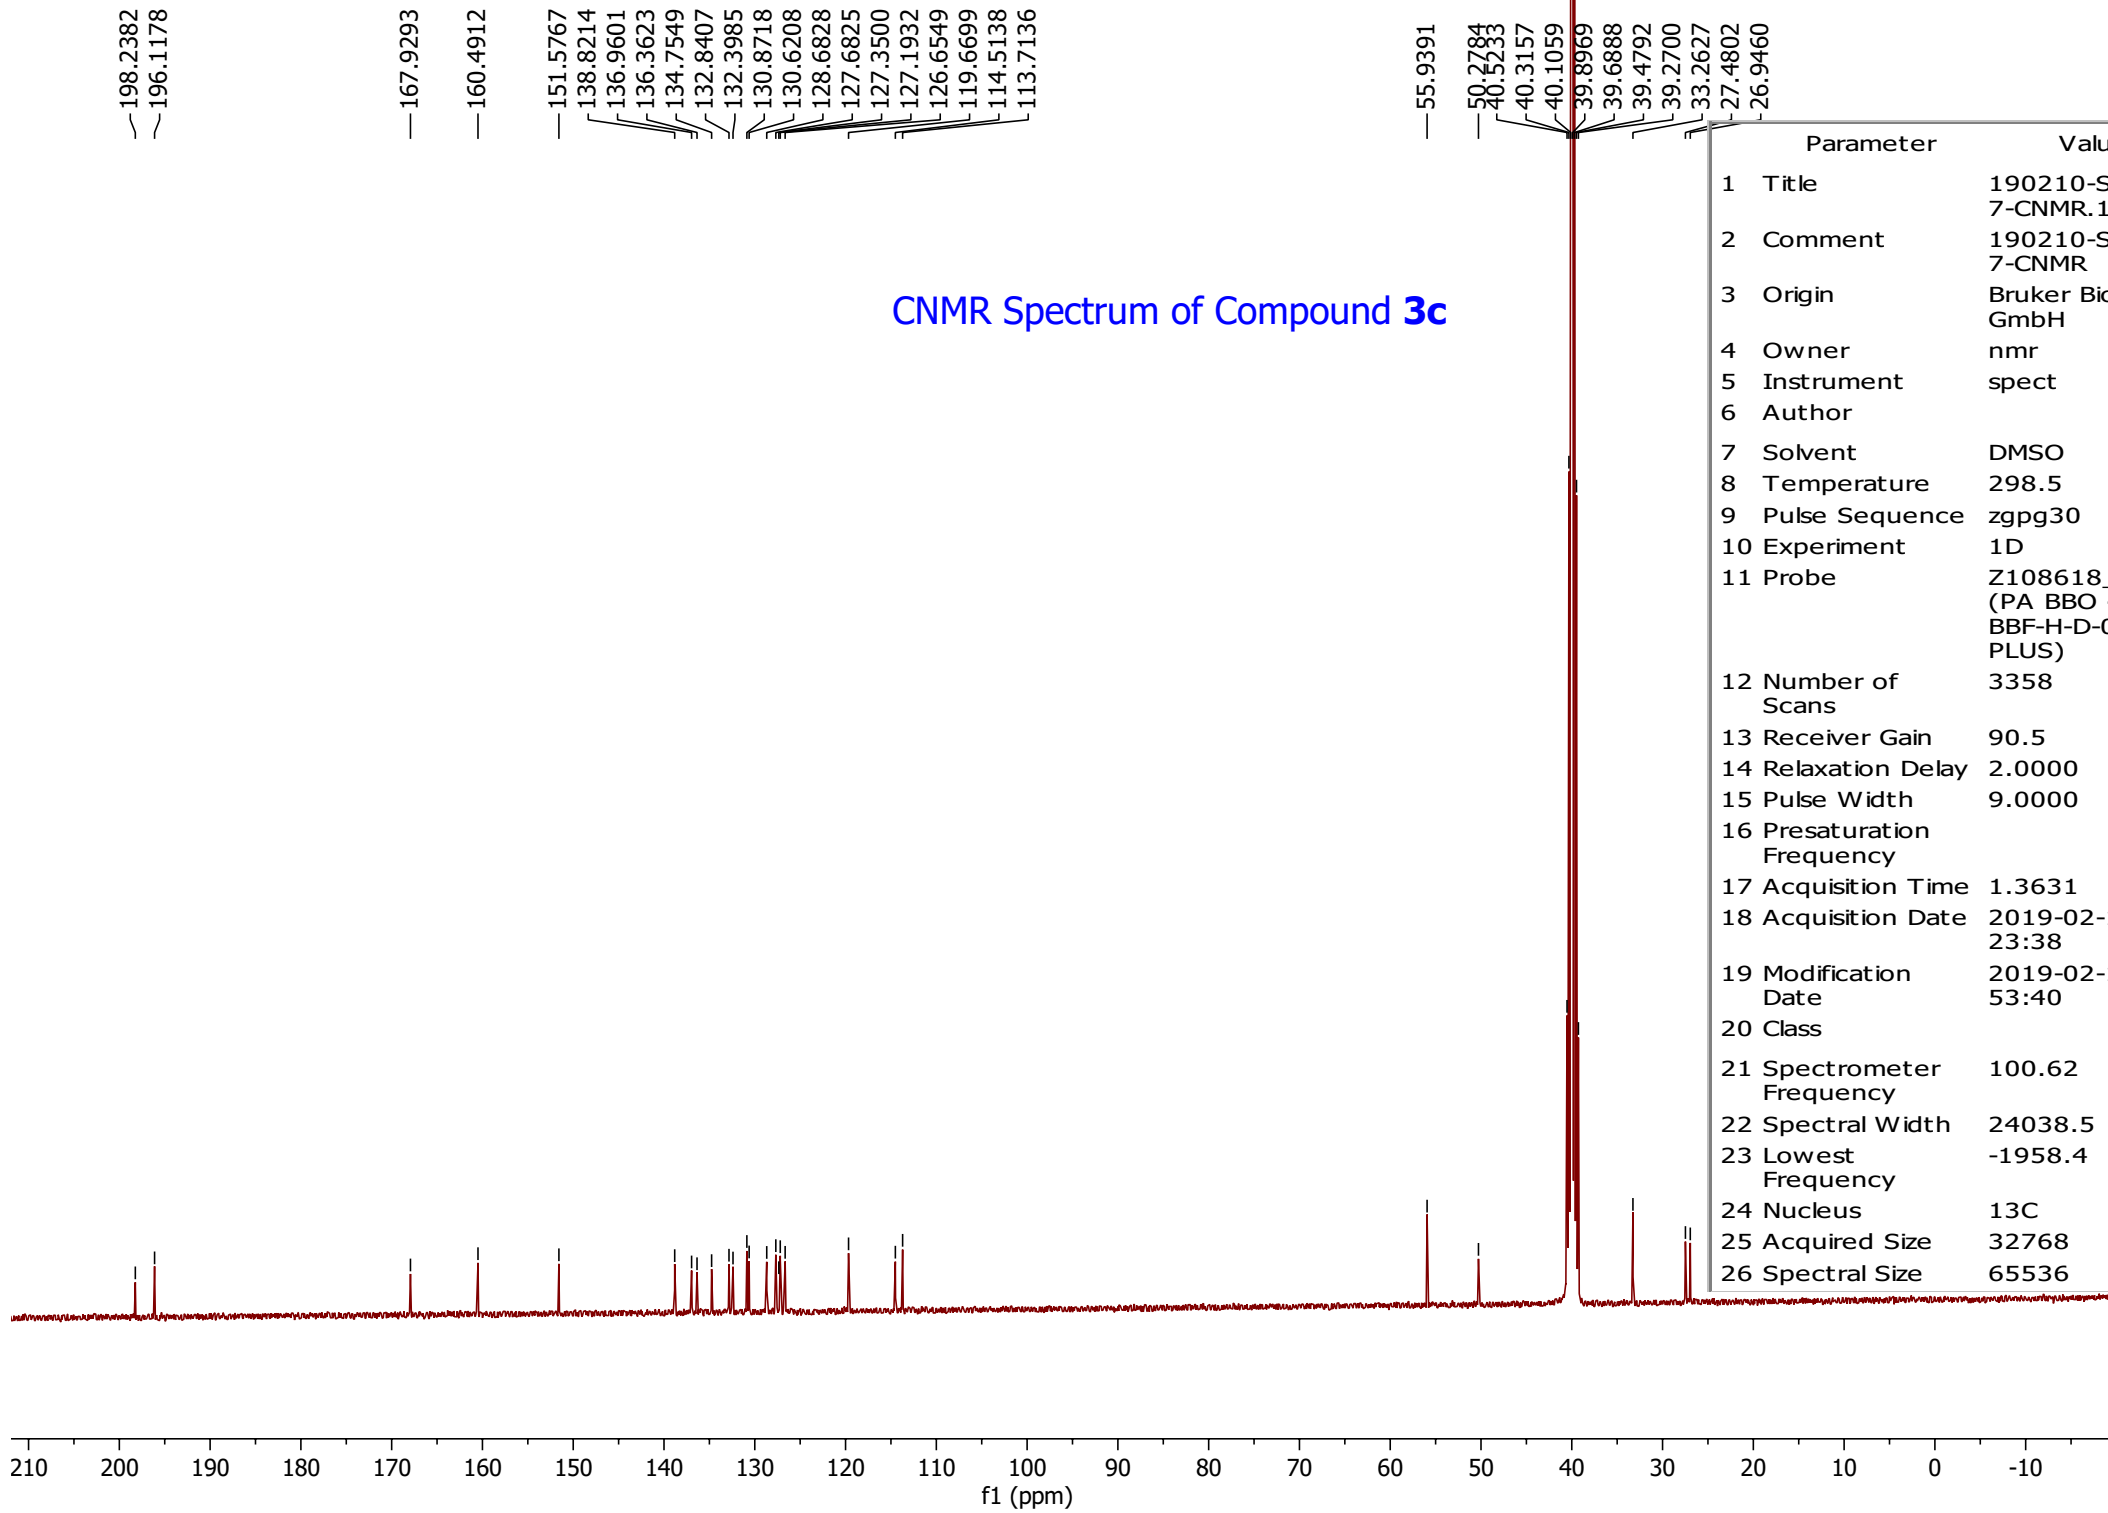

| Parameter                  | Value                                         |
|----------------------------|-----------------------------------------------|
| 1 Title                    | 190210-Sample 7-CNMR.10.fid                   |
| 2 Comment                  | 190210-Sample 7-CNMR                          |
| 3 Origin                   | Bruker BioSpin GmbH                           |
| 4 Owner                    | nmr                                           |
| 5 Instrument               | spect                                         |
| 6 Author                   |                                               |
| 7 Solvent                  | DMSO                                          |
| 8 Temperature              | 298.5                                         |
| 9 Pulse Sequence           | zgpg30                                        |
| 10 Experiment              | 1D                                            |
| 11 Probe                   | Z108618_0166 (PA BBO 400S1 BBF-H-D-05 Z PLUS) |
| 12 Number of Scans         | 3358                                          |
| 13 Receiver Gain           | 90.5                                          |
| 14 Relaxation Delay        | 2.0000                                        |
| 15 Pulse Width             | 9.0000                                        |
| 16 Presaturation Frequency |                                               |
| 17 Acquisition Time        | 1.3631                                        |
| 18 Acquisition Date        | 2019-02-10T15:23:38                           |
| 19 Modification Date       | 2019-02-10T20:53:40                           |
| 20 Class                   |                                               |
| 21 Spectrometer Frequency  | 100.62                                        |
| 22 Spectral Width          | 24038.5                                       |
| 23 Lowest Frequency        | -1958.4                                       |
| 24 Nucleus                 | 13C                                           |
| 25 Acquired Size           | 32768                                         |
| 26 Spectral Size           | 65536                                         |

8.1991  
8.1780  
8.1565  
7.9285  
7.9110  
7.7623  
7.7445  
7.7233  
7.7146  
7.6951  
7.6769  
7.4048  
7.3827  
7.3588

3.4298  
2.5115  
2.5066  
2.5014  
2.3855  
2.3412  
2.2969  
2.2189  
2.1922  
2.1749  
2.1511  
2.0438  
2.0026  
-0.8389  
-0.6078

HNMR Spectrum of Compound **3d**

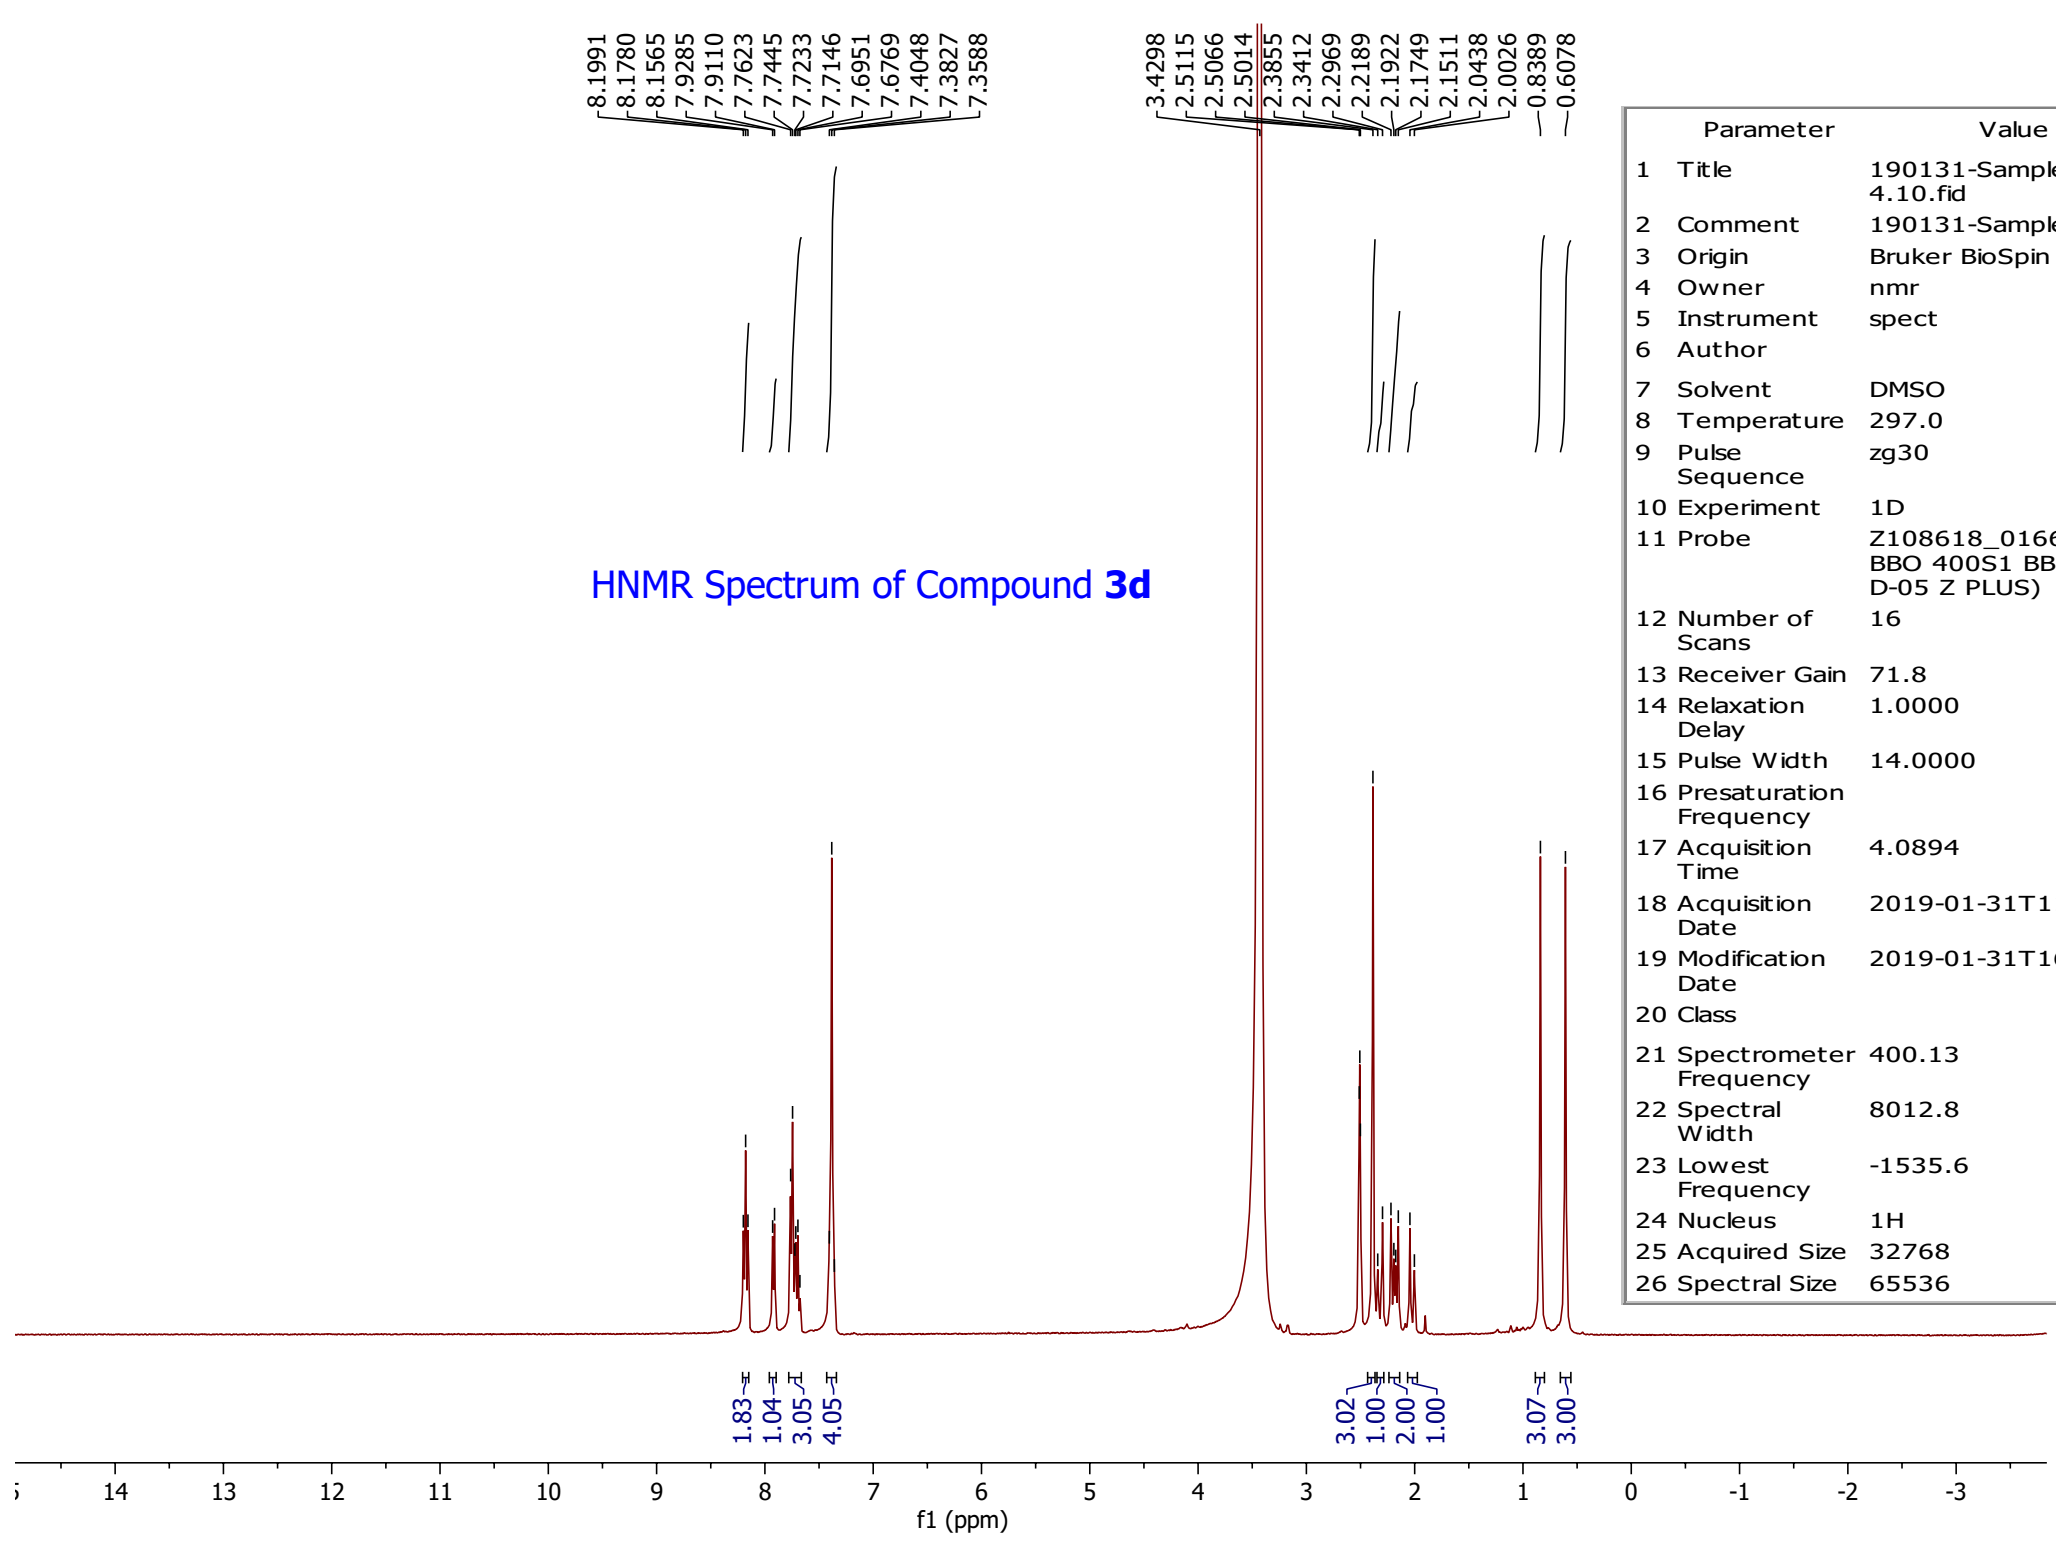

| Parameter                  | Value                                         |
|----------------------------|-----------------------------------------------|
| 1 Title                    | 190131-Sample 4.10.fid                        |
| 2 Comment                  | 190131-Sample 4                               |
| 3 Origin                   | Bruker BioSpin GmbH                           |
| 4 Owner                    | nmr                                           |
| 5 Instrument               | spect                                         |
| 6 Author                   |                                               |
| 7 Solvent                  | DMSO                                          |
| 8 Temperature              | 297.0                                         |
| 9 Pulse Sequence           | zg30                                          |
| 10 Experiment              | 1D                                            |
| 11 Probe                   | Z108618_0166 (PA BBO 400S1 BBF-H-D-05 Z PLUS) |
| 12 Number of Scans         | 16                                            |
| 13 Receiver Gain           | 71.8                                          |
| 14 Relaxation Delay        | 1.0000                                        |
| 15 Pulse Width             | 14.0000                                       |
| 16 Presaturation Frequency |                                               |
| 17 Acquisition Time        | 4.0894                                        |
| 18 Acquisition Date        | 2019-01-31T11:28:16                           |
| 19 Modification Date       | 2019-01-31T16:58:18                           |
| 20 Class                   |                                               |
| 21 Spectrometer Frequency  | 400.13                                        |
| 22 Spectral Width          | 8012.8                                        |
| 23 Lowest Frequency        | -1535.6                                       |
| 24 Nucleus                 | 1H                                            |
| 25 Acquired Size           | 32768                                         |
| 26 Spectral Size           | 65536                                         |

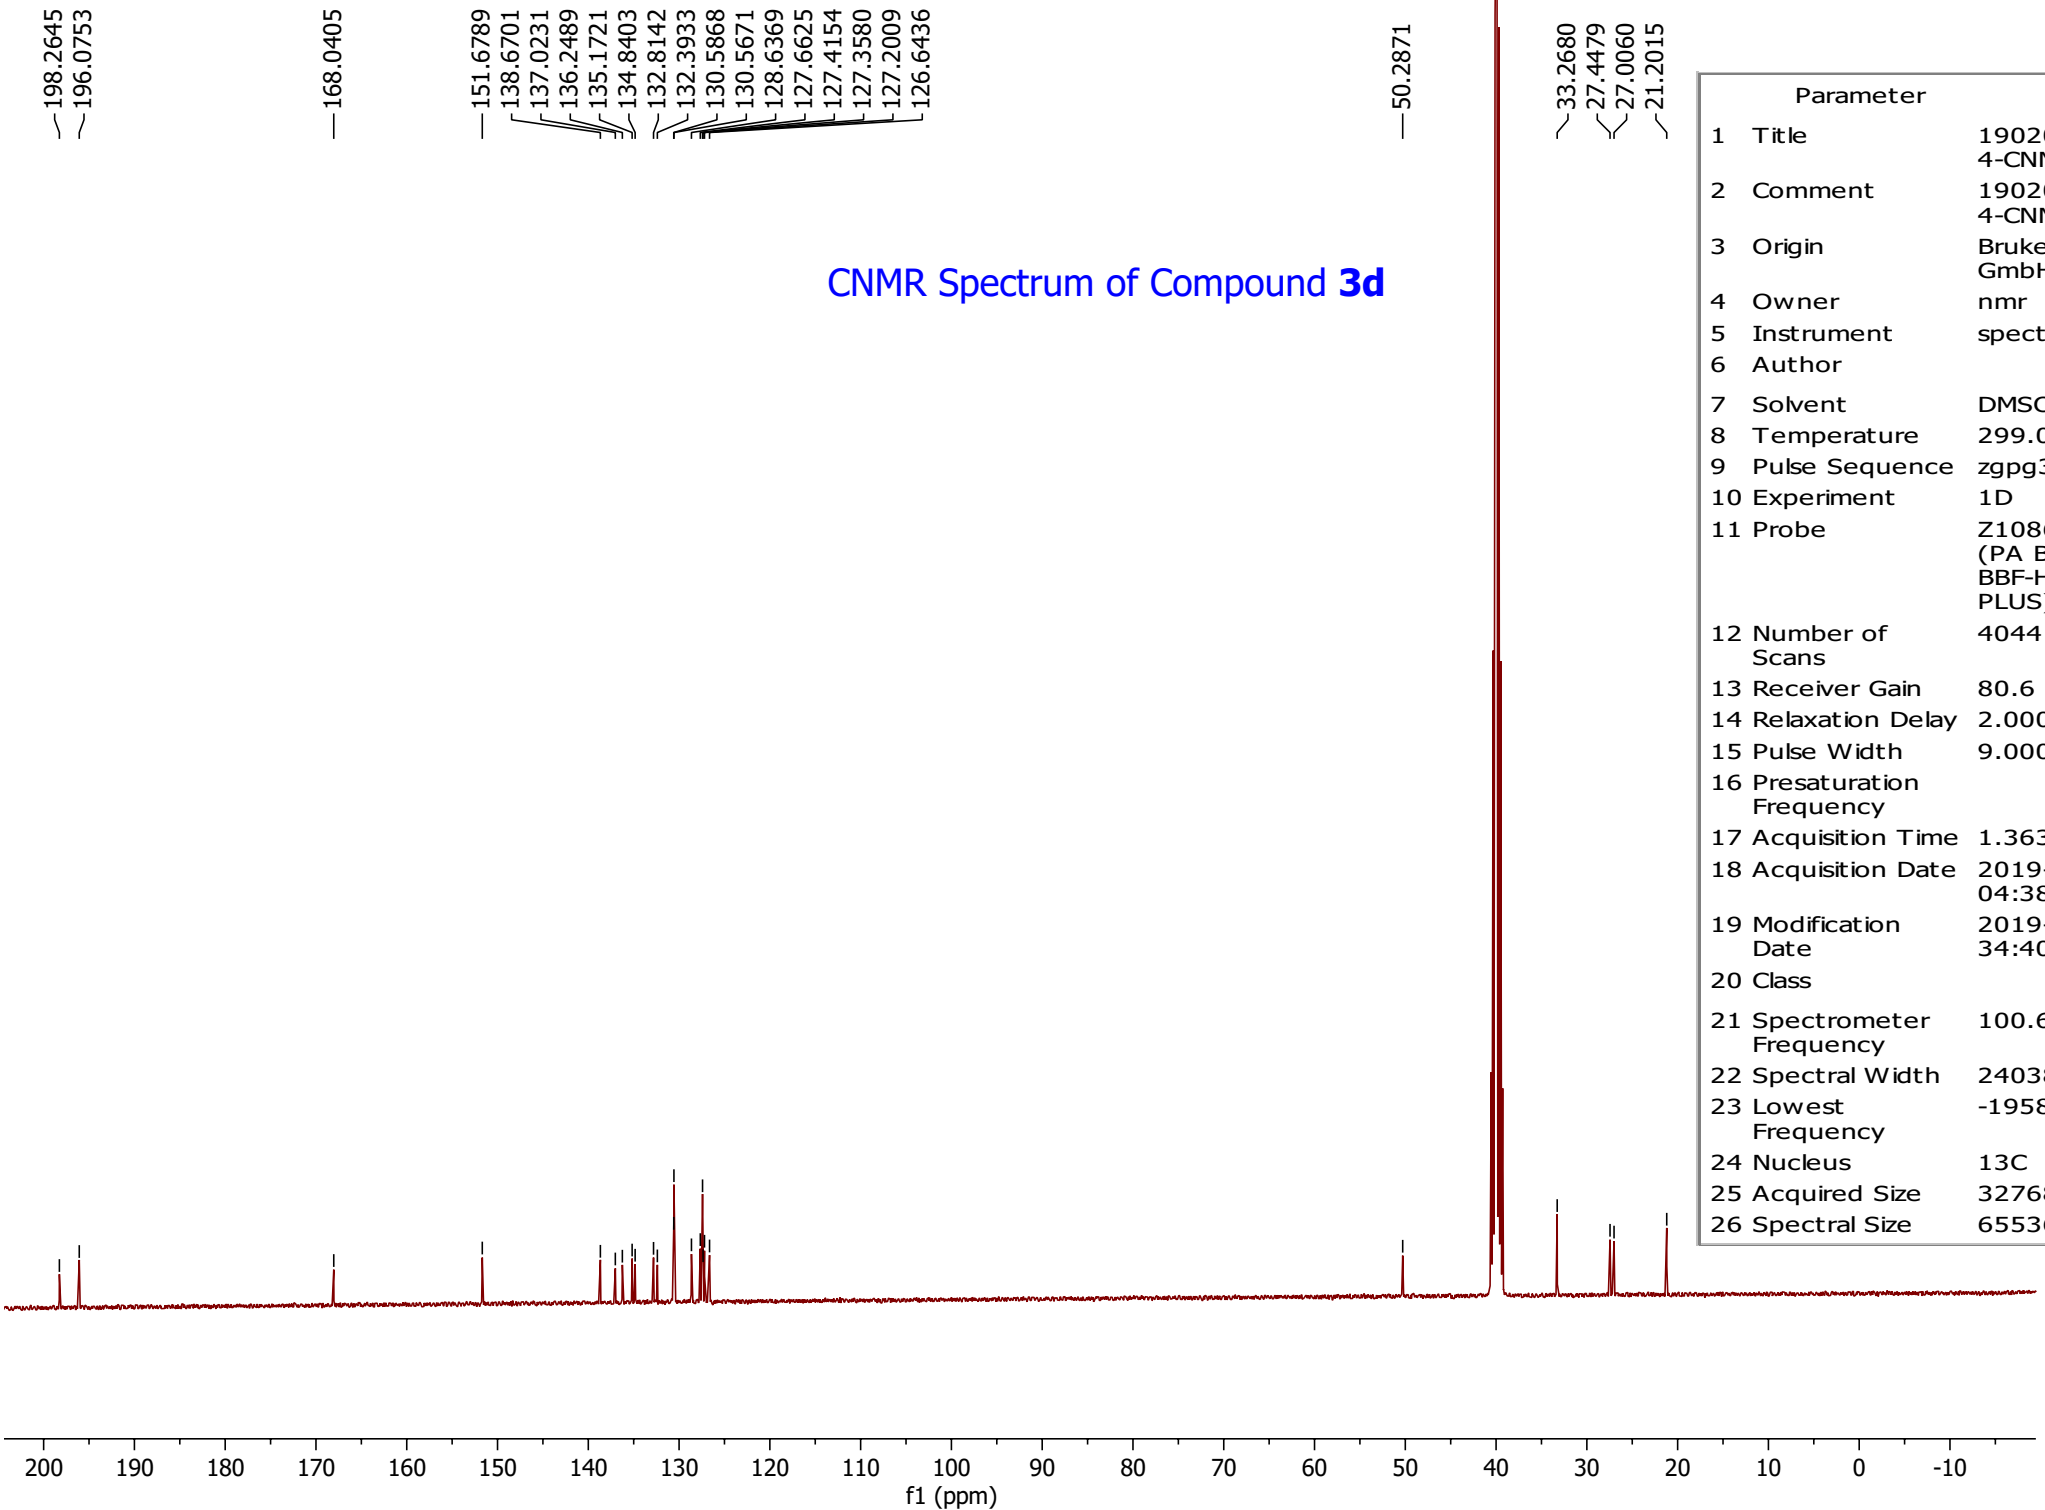

## CNMR Spectrum of Compound 3d

| Parameter                  | Value                                         |
|----------------------------|-----------------------------------------------|
| 1 Title                    | 190209-Sample 4-CNMR.10.fid                   |
| 2 Comment                  | 190209-Sample 4-CNMR                          |
| 3 Origin                   | Bruker BioSpin GmbH                           |
| 4 Owner                    | nmr                                           |
| 5 Instrument               | spect                                         |
| 6 Author                   |                                               |
| 7 Solvent                  | DMSO                                          |
| 8 Temperature              | 299.0                                         |
| 9 Pulse Sequence           | zgpg30                                        |
| 10 Experiment              | 1D                                            |
| 11 Probe                   | Z108618_0166 (PA BBO 400S1 BBF-H-D-05 Z PLUS) |
| 12 Number of Scans         | 4044                                          |
| 13 Receiver Gain           | 80.6                                          |
| 14 Relaxation Delay        | 2.0000                                        |
| 15 Pulse Width             | 9.0000                                        |
| 16 Presaturation Frequency |                                               |
| 17 Acquisition Time        | 1.3631                                        |
| 18 Acquisition Date        | 2019-02-09T13:04:38                           |
| 19 Modification Date       | 2019-02-09T18:34:40                           |
| 20 Class                   |                                               |
| 21 Spectrometer Frequency  | 100.62                                        |
| 22 Spectral Width          | 24038.5                                       |
| 23 Lowest Frequency        | -1958.4                                       |
| 24 Nucleus                 | 13C                                           |
| 25 Acquired Size           | 32768                                         |
| 26 Spectral Size           | 65536                                         |

### HNMR Spectrum of Compound **3e**

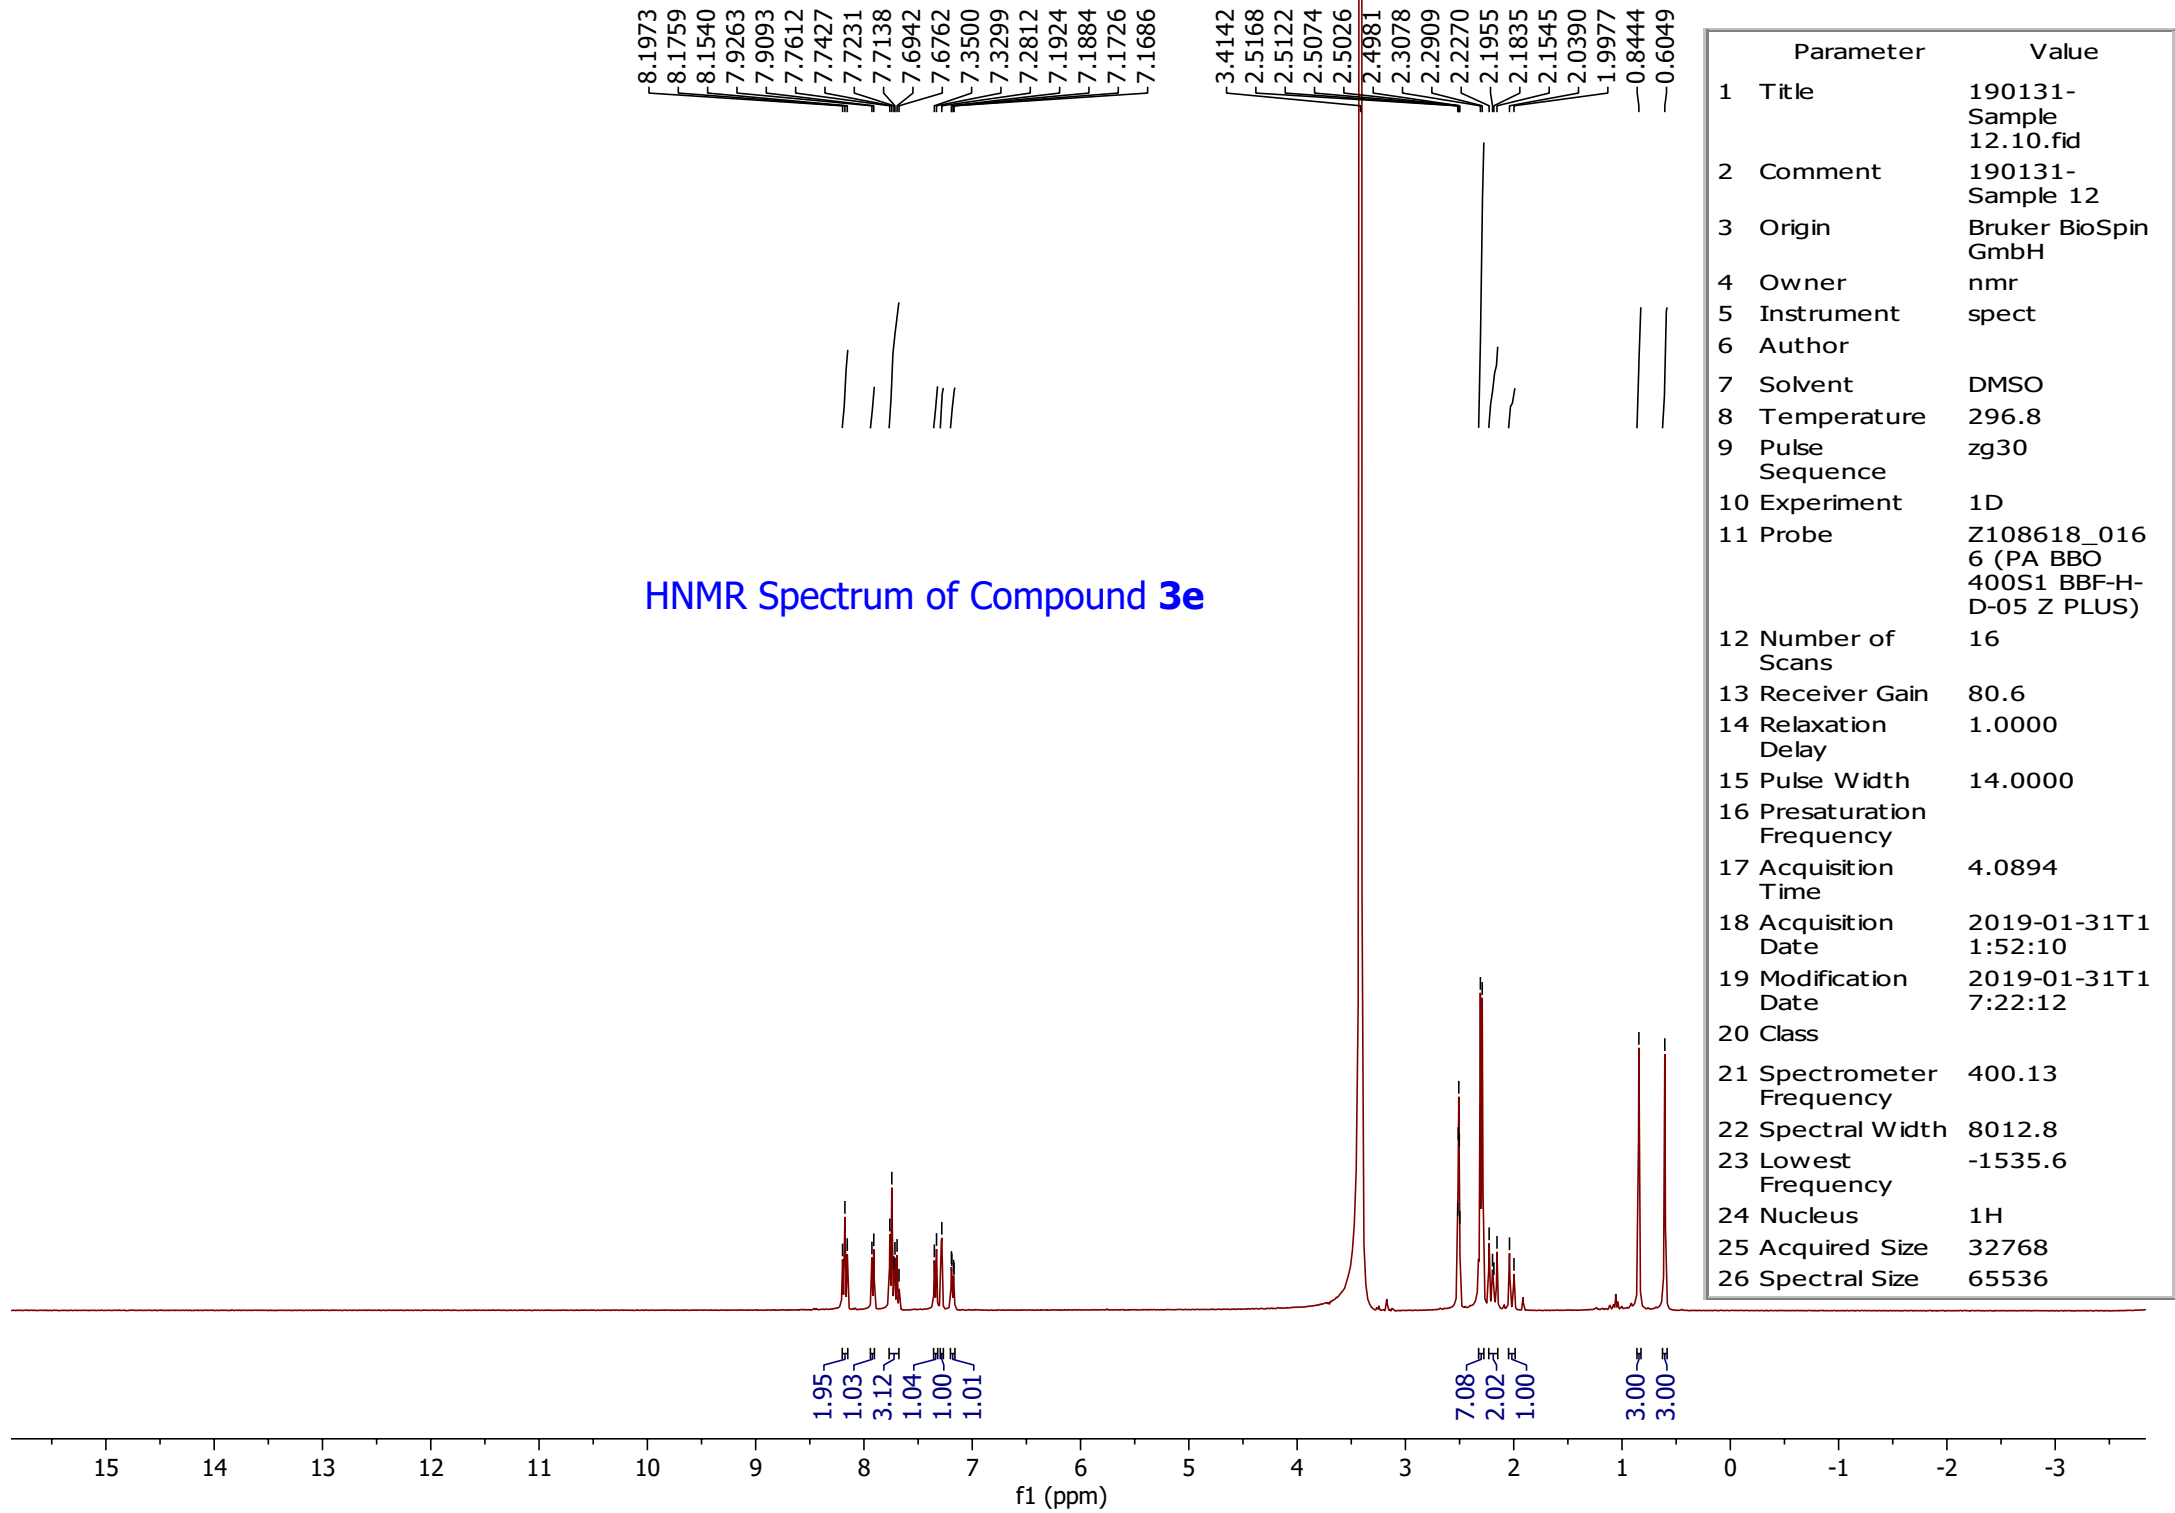



~198.2931  
~196.0780

—168.0533

—151.7456  
138.2146  
137.4452  
137.0746  
136.0803  
135.3787  
134.9521  
132.7713  
132.3842  
130.9006  
130.5348  
128.5254  
128.4115  
127.6195  
127.3825  
127.1860  
126.6426  
124.6943

—50.3061

—33.3087  
27.4274  
27.0143  
19.9016  
19.5714

### CNMR Spectrum of Compound 3e

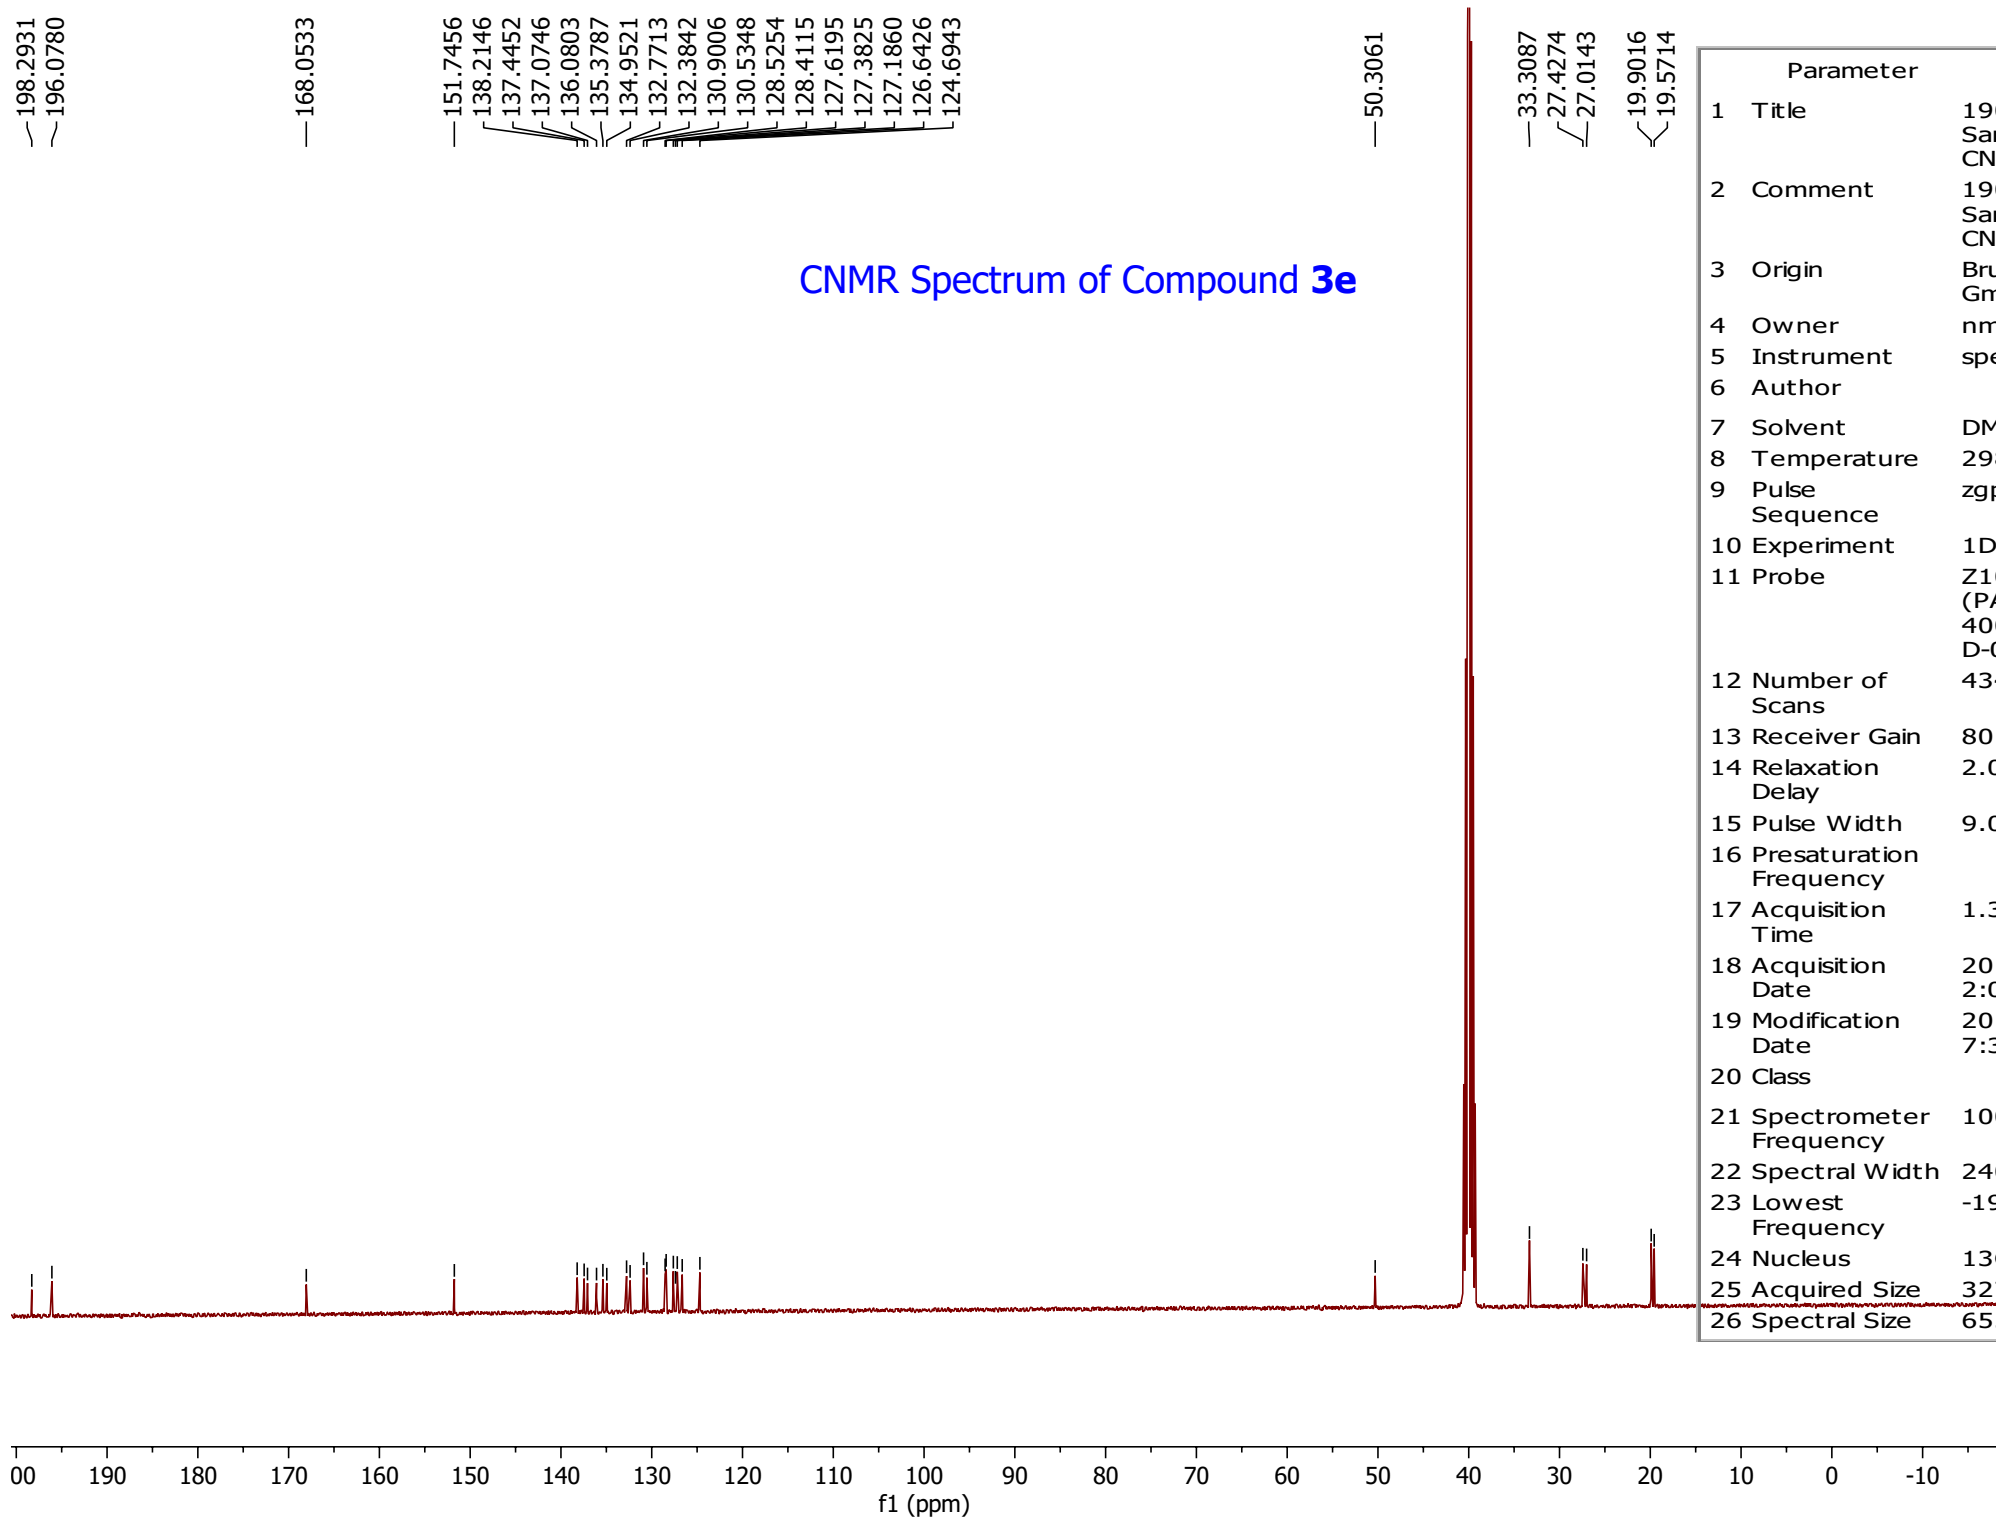

| Parameter                  | Value                                         |
|----------------------------|-----------------------------------------------|
| 1 Title                    | 190216-Sample 12-CNMR.10.fid                  |
| 2 Comment                  | 190216-Sample 12-CNMR                         |
| 3 Origin                   | Bruker BioSpin GmbH                           |
| 4 Owner                    | nmr                                           |
| 5 Instrument               | spect                                         |
| 6 Author                   |                                               |
| 7 Solvent                  | DMSO                                          |
| 8 Temperature              | 298.7                                         |
| 9 Pulse Sequence           | zgpg30                                        |
| 10 Experiment              | 1D                                            |
| 11 Probe                   | Z108618_0166 (PA BBO 400S1 BBF-H-D-05 Z PLUS) |
| 12 Number of Scans         | 4347                                          |
| 13 Receiver Gain           | 80.6                                          |
| 14 Relaxation Delay        | 2.0000                                        |
| 15 Pulse Width             | 9.0000                                        |
| 16 Presaturation Frequency |                                               |
| 17 Acquisition Time        | 1.3631                                        |
| 18 Acquisition Date        | 2019-02-16T12:06:52                           |
| 19 Modification Date       | 2019-02-16T17:36:54                           |
| 20 Class                   |                                               |
| 21 Spectrometer Frequency  | 100.62                                        |
| 22 Spectral Width          | 24038.5                                       |
| 23 Lowest Frequency        | -1958.4                                       |
| 24 Nucleus                 | 13C                                           |
| 25 Acquired Size           | 32768                                         |
| 26 Spectral Size           | 65536                                         |

8.1961  
8.1928  
8.1824  
8.1763  
8.1731  
8.1659  
8.1592  
7.7575  
7.7512  
7.7476  
7.7394  
7.7342  
7.7308  
7.7173  
7.6977  
7.2329  
7.2103  
7.0934  
7.0857  
7.0708  
7.0632

3.9255  
3.7819  
3.3547  
2.5165  
2.5119  
2.5072  
2.5026  
2.4980  
2.2528  
2.2088  
2.1849  
2.1765  
2.1347  
2.0618  
2.0206  
0.8500  
0.6412

HNMR Spectrum of Compound **3f**

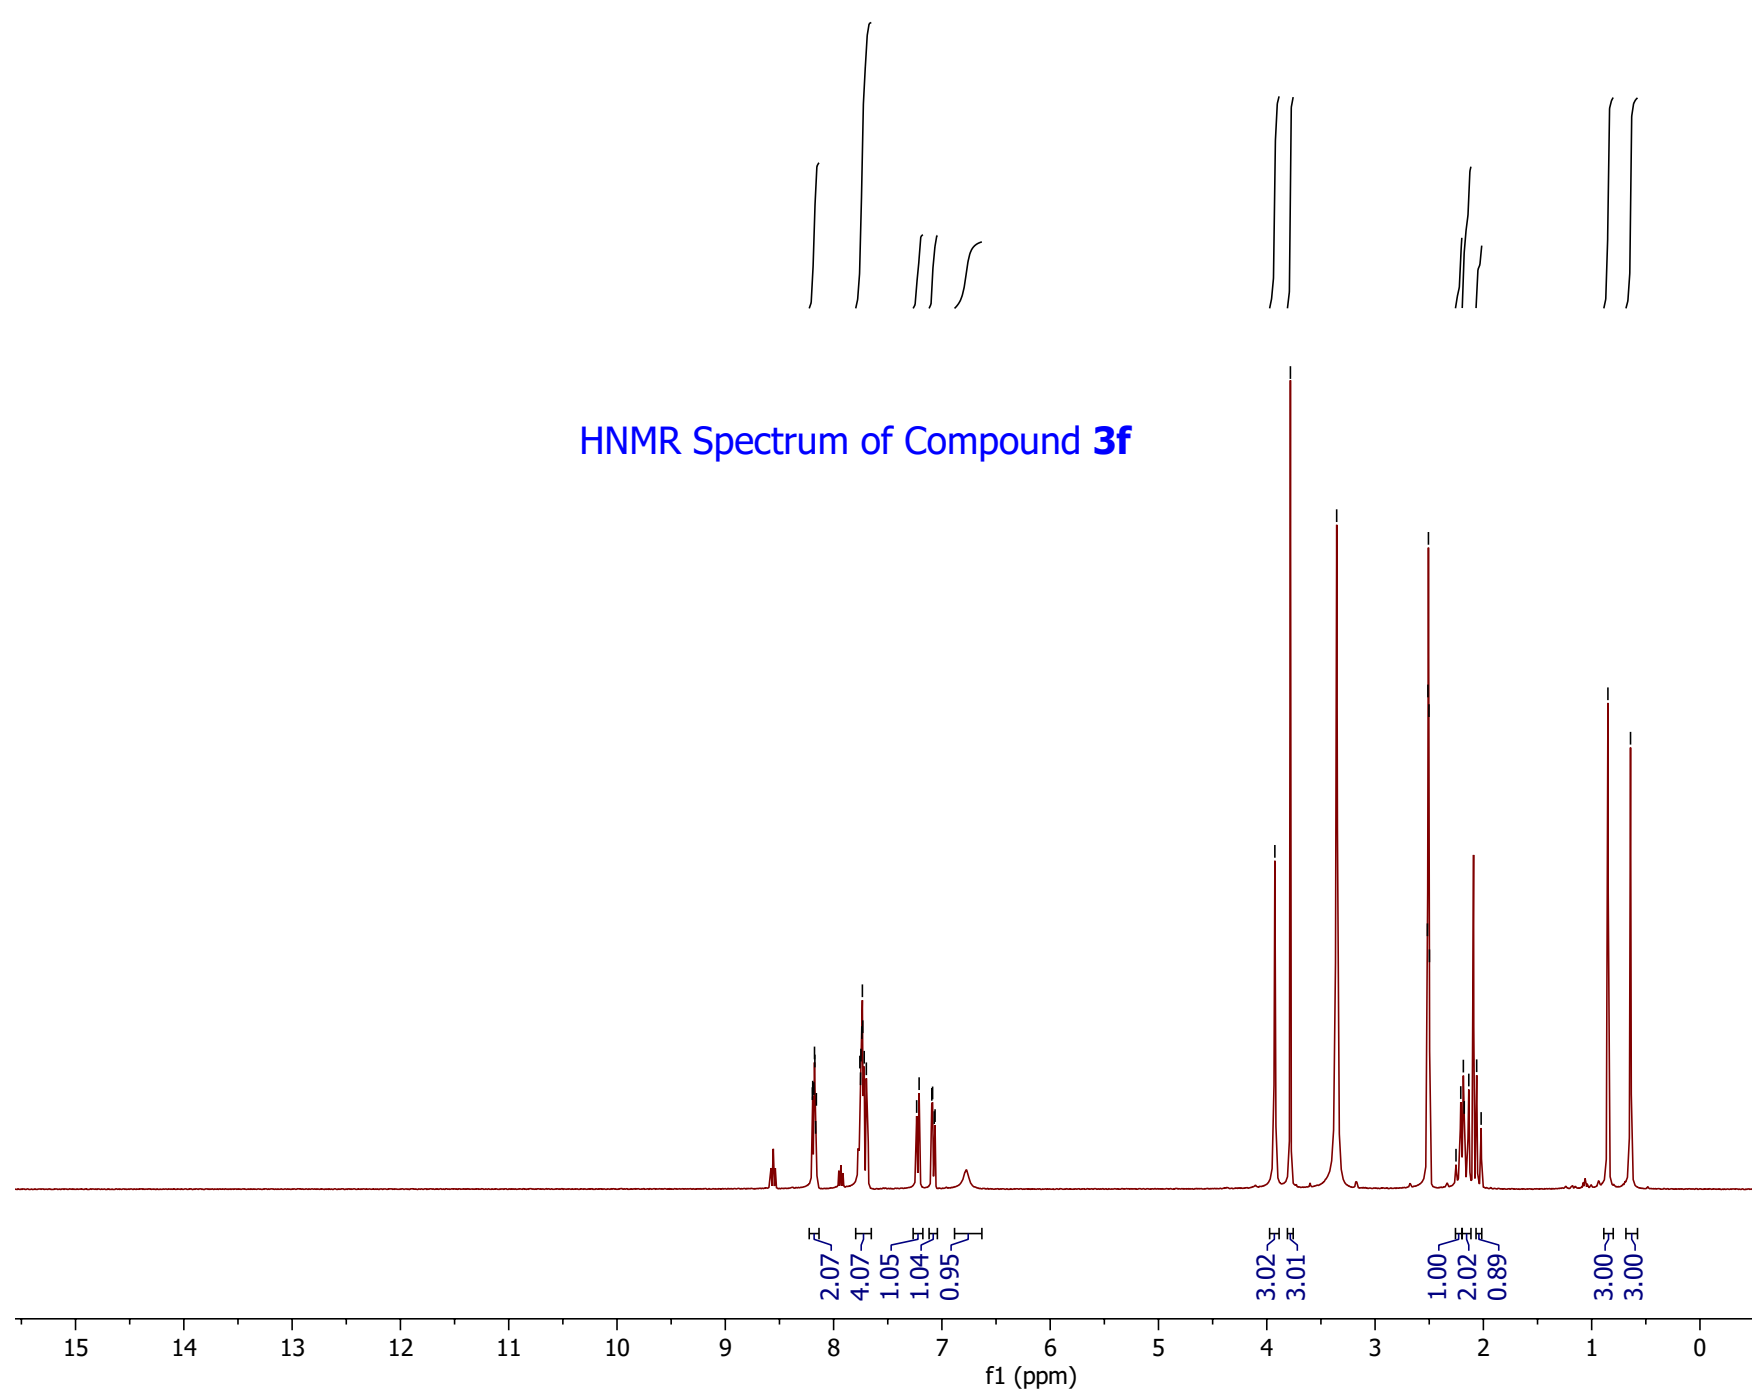

| Parameter                  | Value                                          |
|----------------------------|------------------------------------------------|
| 1 Title                    | 190201-Sample 16-HNMR.10.fid                   |
| 2 Comment                  | 190201-Sample 16-HNMR                          |
| 3 Origin                   | Bruker BioSpin GmbH                            |
| 4 Owner                    | nmr                                            |
| 5 Instrument               | spect                                          |
| 6 Author                   |                                                |
| 7 Solvent                  | DMSO                                           |
| 8 Temperature              | 296.6                                          |
| 9 Pulse Sequence           | zg30                                           |
| 10 Experiment              | 1D                                             |
| 11 Probe                   | Z108618_01 66 (PA BBO 400S1 BBF-H-D-05 Z PLUS) |
| 12 Number of Scans         | 16                                             |
| 13 Receiver Gain           | 161.0                                          |
| 14 Relaxation Delay        | 1.0000                                         |
| 15 Pulse Width             | 14.0000                                        |
| 16 Presaturation Frequency |                                                |
| 17 Acquisition Time        | 4.0894                                         |
| 18 Acquisition Date        | 2019-02-01T 08:55:45                           |
| 19 Modification Date       | 2019-02-01T 14:25:46                           |
| 20 Class                   |                                                |
| 21 Spectrometer Frequency  | 400.13                                         |
| 22 Spectral Width          | 8012.8                                         |
| 23 Lowest Frequency        | -1535.6                                        |
| 24 Nucleus                 | <sup>1</sup> H                                 |
| 25 Acquired Size           | 32768                                          |
| 26 Spectral Size           | 65536                                          |

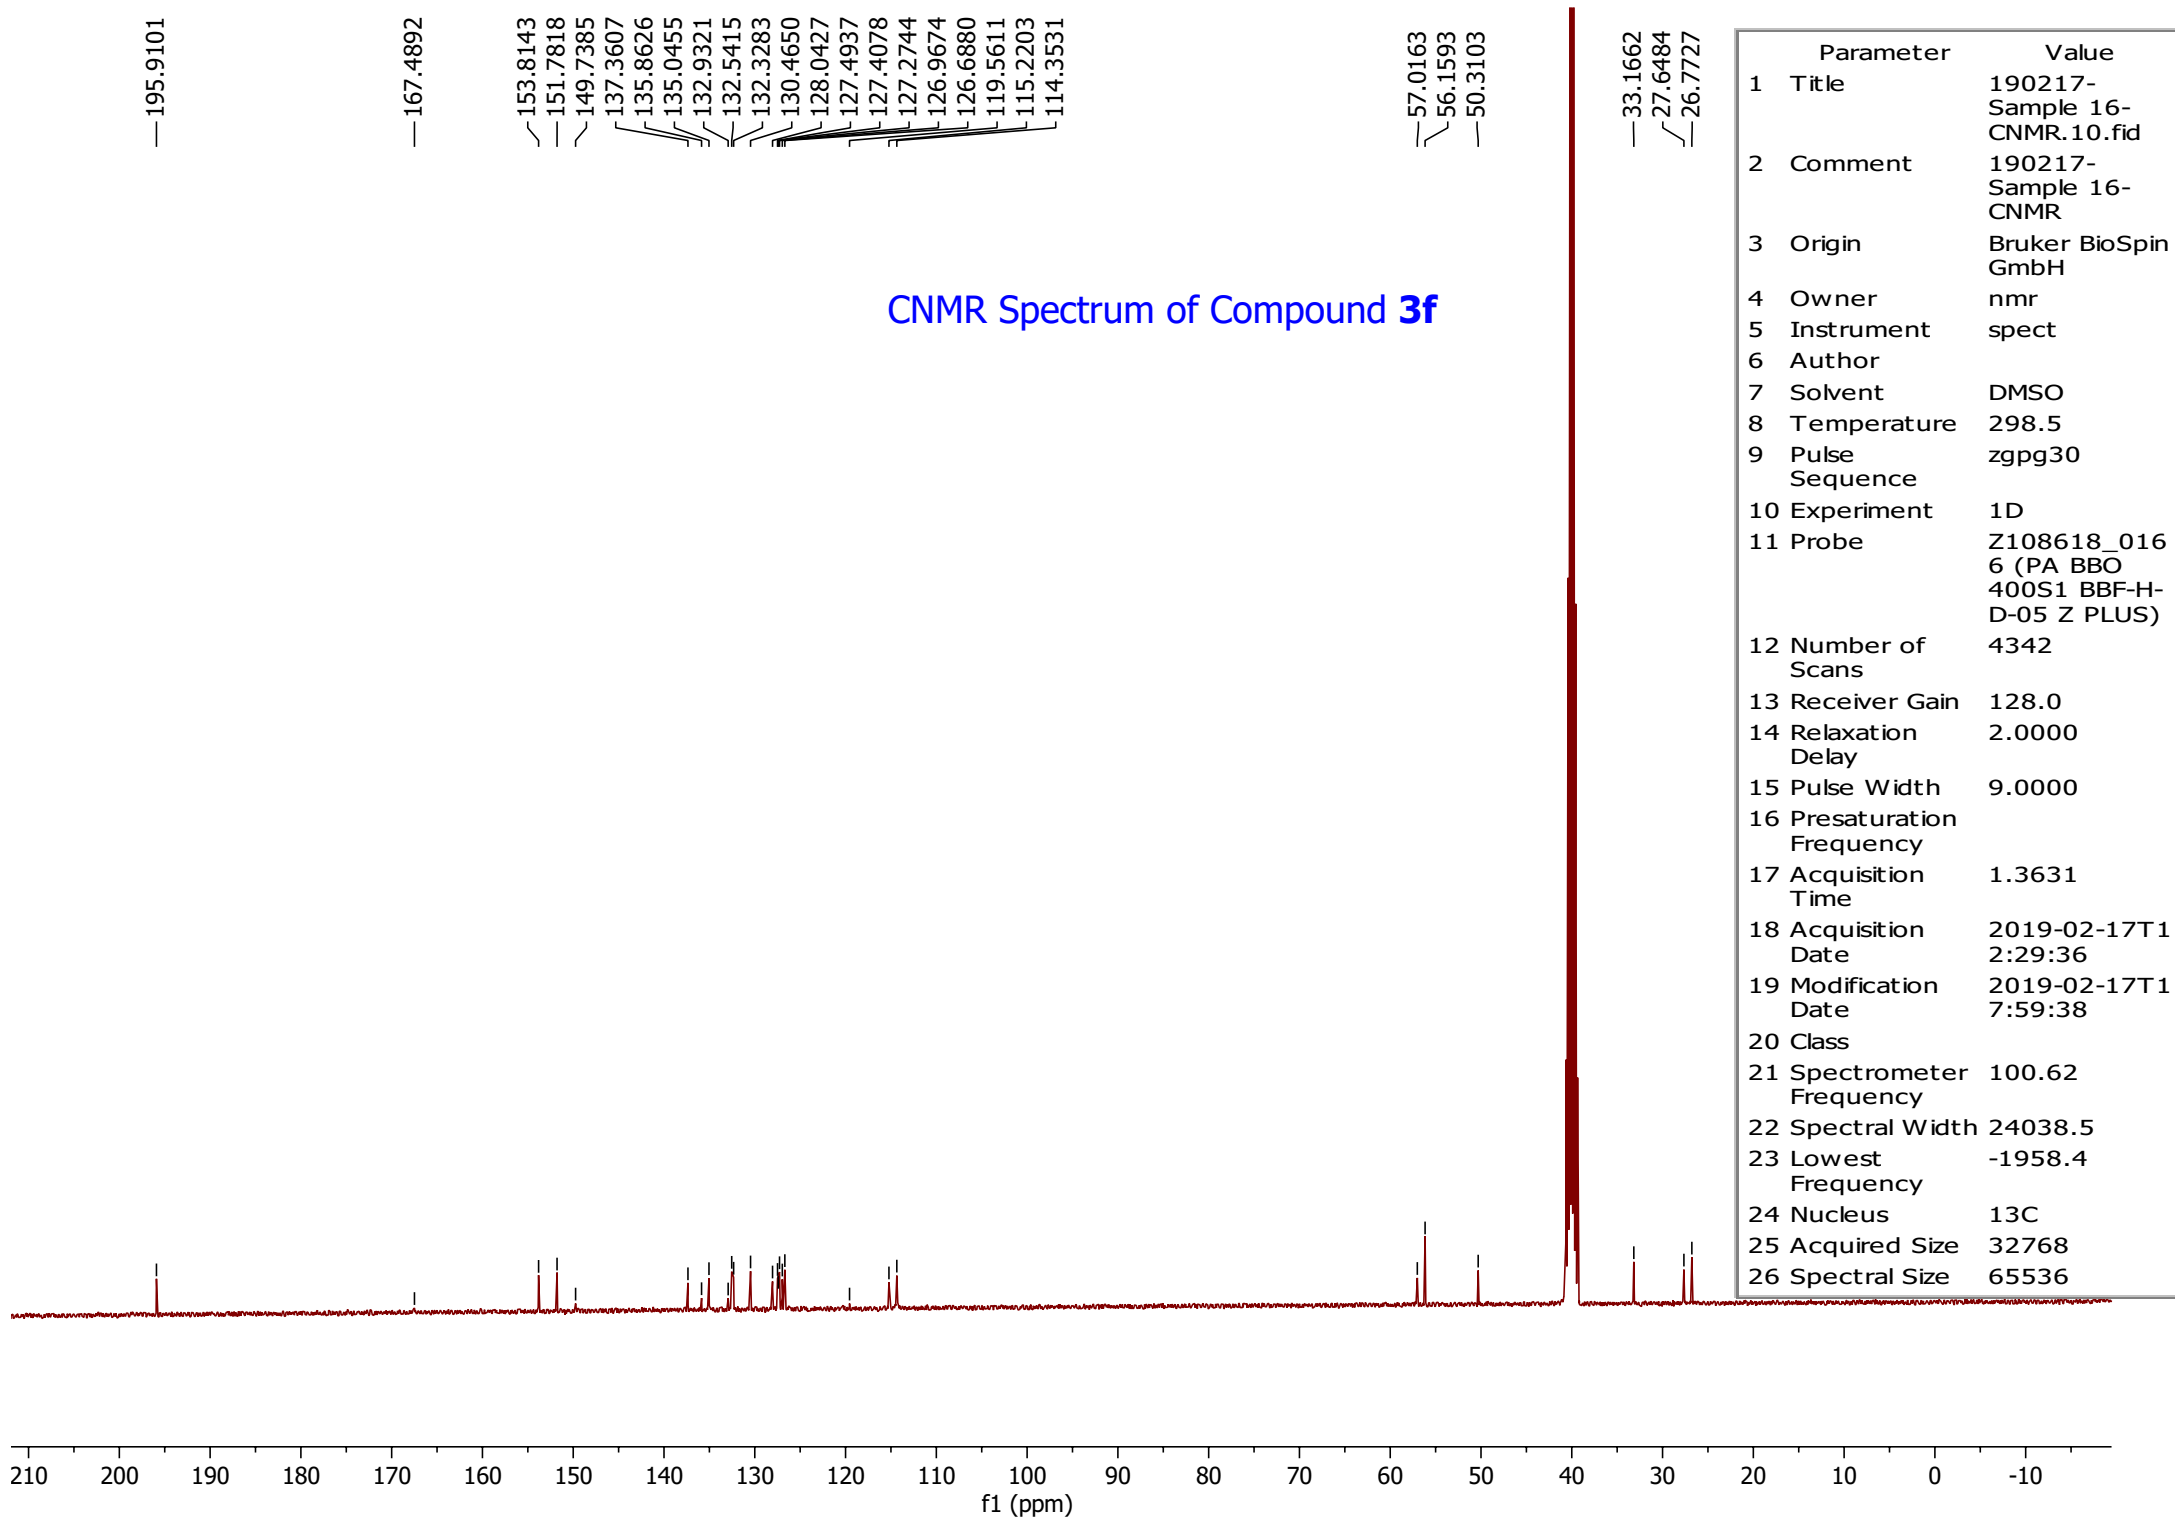

| Parameter                  | Value                                          |
|----------------------------|------------------------------------------------|
| 1 Title                    | 190217-Sample 16-CNMR.10.fid                   |
| 2 Comment                  | 190217-Sample 16-CNMR                          |
| 3 Origin                   | Bruker BioSpin GmbH                            |
| 4 Owner                    | nmr                                            |
| 5 Instrument               | spect                                          |
| 6 Author                   |                                                |
| 7 Solvent                  | DMSO                                           |
| 8 Temperature              | 298.5                                          |
| 9 Pulse Sequence           | zgpg30                                         |
| 10 Experiment              | 1D                                             |
| 11 Probe                   | Z108618_016 6 (PA BBO 400S1 BBF-H-D-05 Z PLUS) |
| 12 Number of Scans         | 4342                                           |
| 13 Receiver Gain           | 128.0                                          |
| 14 Relaxation Delay        | 2.0000                                         |
| 15 Pulse Width             | 9.0000                                         |
| 16 Presaturation Frequency |                                                |
| 17 Acquisition Time        | 1.3631                                         |
| 18 Acquisition Date        | 2019-02-17T12:29:36                            |
| 19 Modification Date       | 2019-02-17T17:59:38                            |
| 20 Class                   |                                                |
| 21 Spectrometer Frequency  | 100.62                                         |
| 22 Spectral Width          | 24038.5                                        |
| 23 Lowest Frequency        | -1958.4                                        |
| 24 Nucleus                 | 13C                                            |
| 25 Acquired Size           | 32768                                          |
| 26 Spectral Size           | 65536                                          |

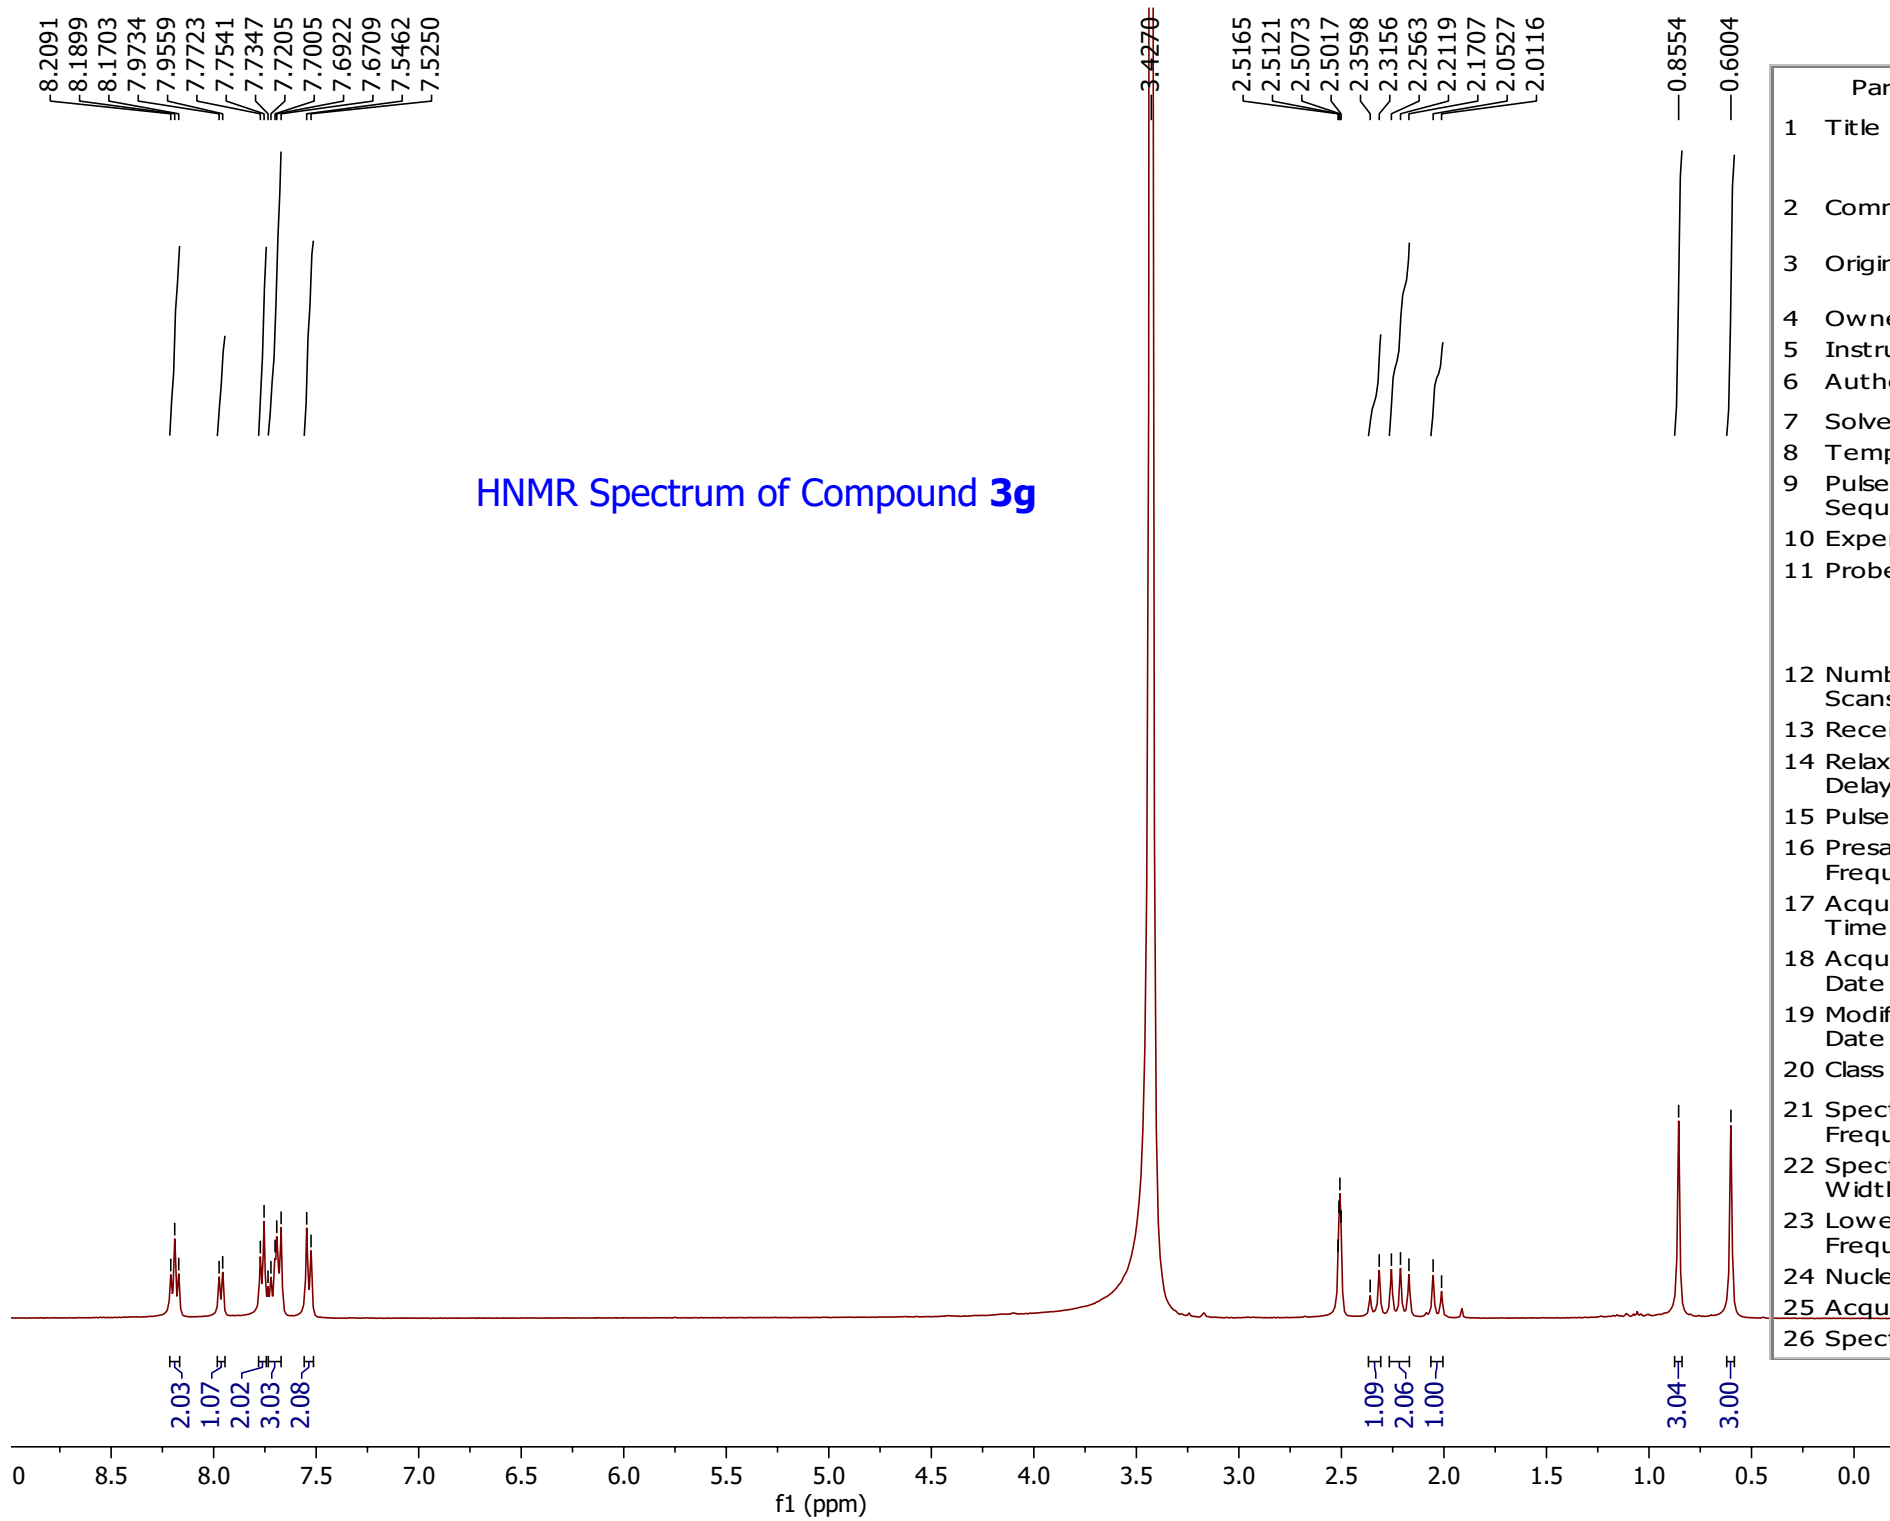

| Parameter                  | Value                                          |
|----------------------------|------------------------------------------------|
| 1 Title                    | 190131-Sample 8.10.fid                         |
| 2 Comment                  | 190131-Sample 8                                |
| 3 Origin                   | Bruker BioSpin GmbH                            |
| 4 Owner                    | nmr                                            |
| 5 Instrument               | spect                                          |
| 6 Author                   |                                                |
| 7 Solvent                  | DMSO                                           |
| 8 Temperature              | 297.1                                          |
| 9 Pulse Sequence           | zg30                                           |
| 10 Experiment              | 1D                                             |
| 11 Probe                   | Z108618_01 66 (PA BBO 400S1 BBF-H-D-05 Z PLUS) |
| 12 Number of Scans         | 16                                             |
| 13 Receiver Gain           | 80.6                                           |
| 14 Relaxation Delay        | 1.0000                                         |
| 15 Pulse Width             | 14.0000                                        |
| 16 Presaturation Frequency |                                                |
| 17 Acquisition Time        | 4.0894                                         |
| 18 Acquisition Date        | 2019-01-31T 11:42:41                           |
| 19 Modification Date       | 2019-01-31T 17:12:44                           |
| 20 Class                   |                                                |
| 21 Spectrometer Frequency  | 400.13                                         |
| 22 Spectral Width          | 8012.8                                         |
| 23 Lowest Frequency        | -1535.6                                        |
| 24 Nucleus                 | 1H                                             |
| 25 Acquired Size           | 32768                                          |
| 26 Spectral Size           | 65536                                          |

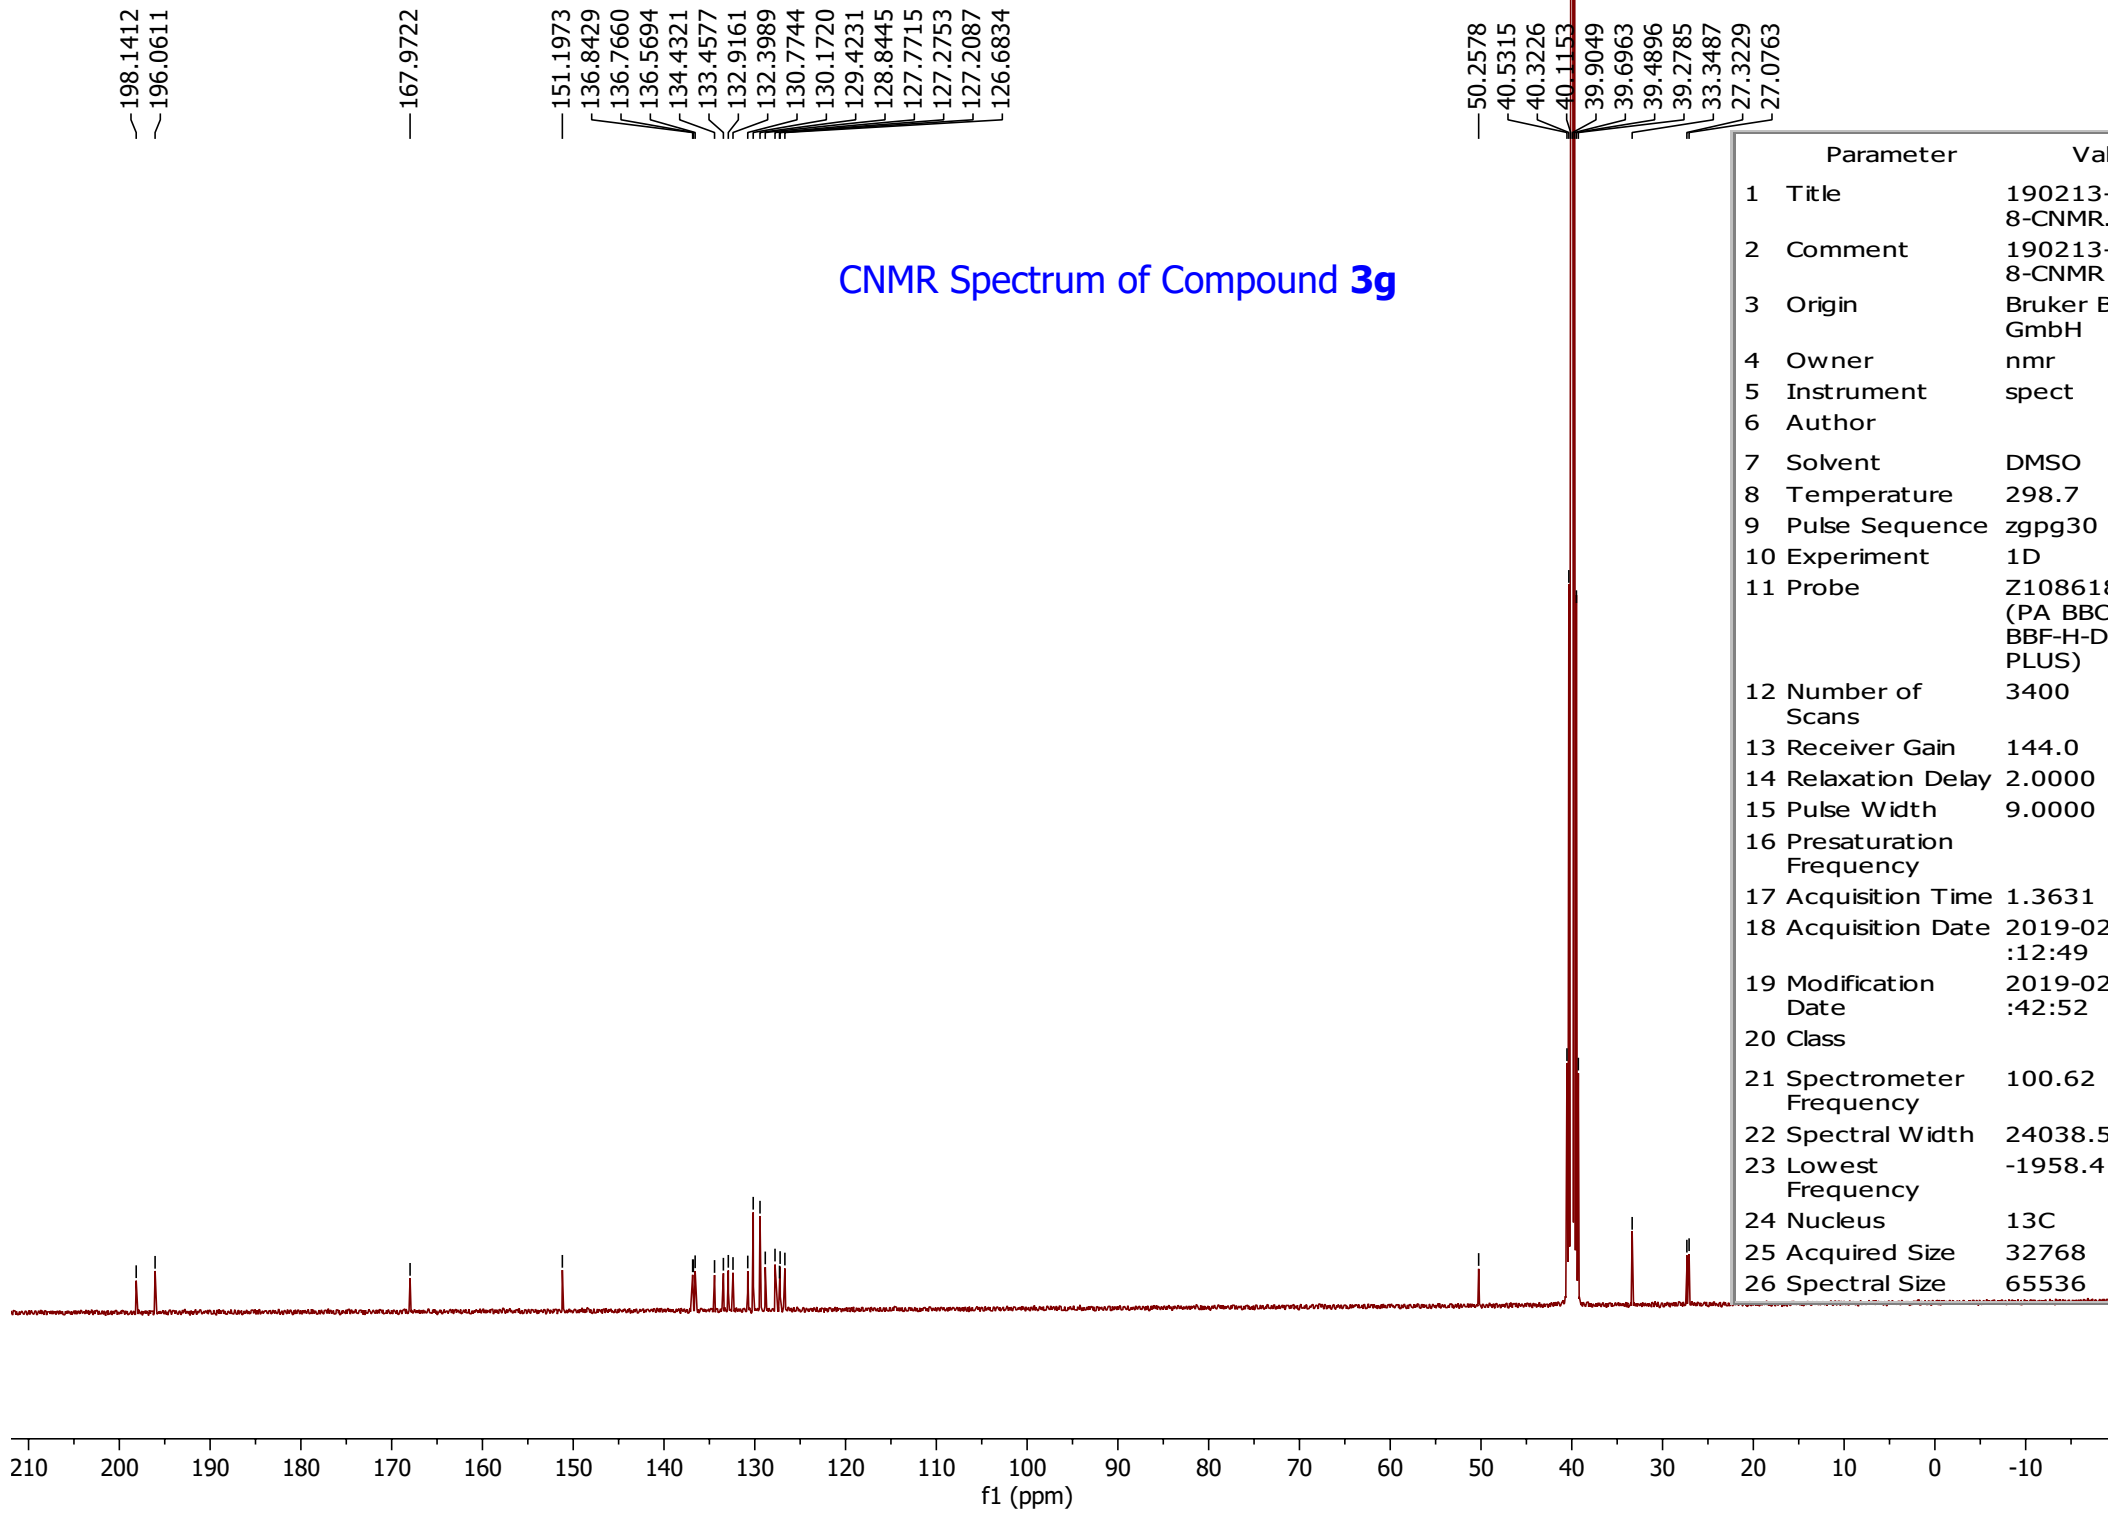

### CNMR Spectrum of Compound **3g**

| Parameter                  | Value                                         |
|----------------------------|-----------------------------------------------|
| 1 Title                    | 190213-Sample 8-CNMR.10.fid                   |
| 2 Comment                  | 190213-Sample 8-CNMR                          |
| 3 Origin                   | Bruker BioSpin GmbH                           |
| 4 Owner                    | nmr                                           |
| 5 Instrument               | spect                                         |
| 6 Author                   |                                               |
| 7 Solvent                  | DMSO                                          |
| 8 Temperature              | 298.7                                         |
| 9 Pulse Sequence           | zgpg30                                        |
| 10 Experiment              | 1D                                            |
| 11 Probe                   | Z108618_0166 (PA BBO 400S1 BBF-H-D-05 Z PLUS) |
| 12 Number of Scans         | 3400                                          |
| 13 Receiver Gain           | 144.0                                         |
| 14 Relaxation Delay        | 2.0000                                        |
| 15 Pulse Width             | 9.0000                                        |
| 16 Presaturation Frequency |                                               |
| 17 Acquisition Time        | 1.3631                                        |
| 18 Acquisition Date        | 2019-02-13T15:12:49                           |
| 19 Modification Date       | 2019-02-13T20:42:52                           |
| 20 Class                   |                                               |
| 21 Spectrometer Frequency  | 100.62                                        |
| 22 Spectral Width          | 24038.5                                       |
| 23 Lowest Frequency        | -1958.4                                       |
| 24 Nucleus                 | 13C                                           |
| 25 Acquired Size           | 32768                                         |
| 26 Spectral Size           | 65536                                         |

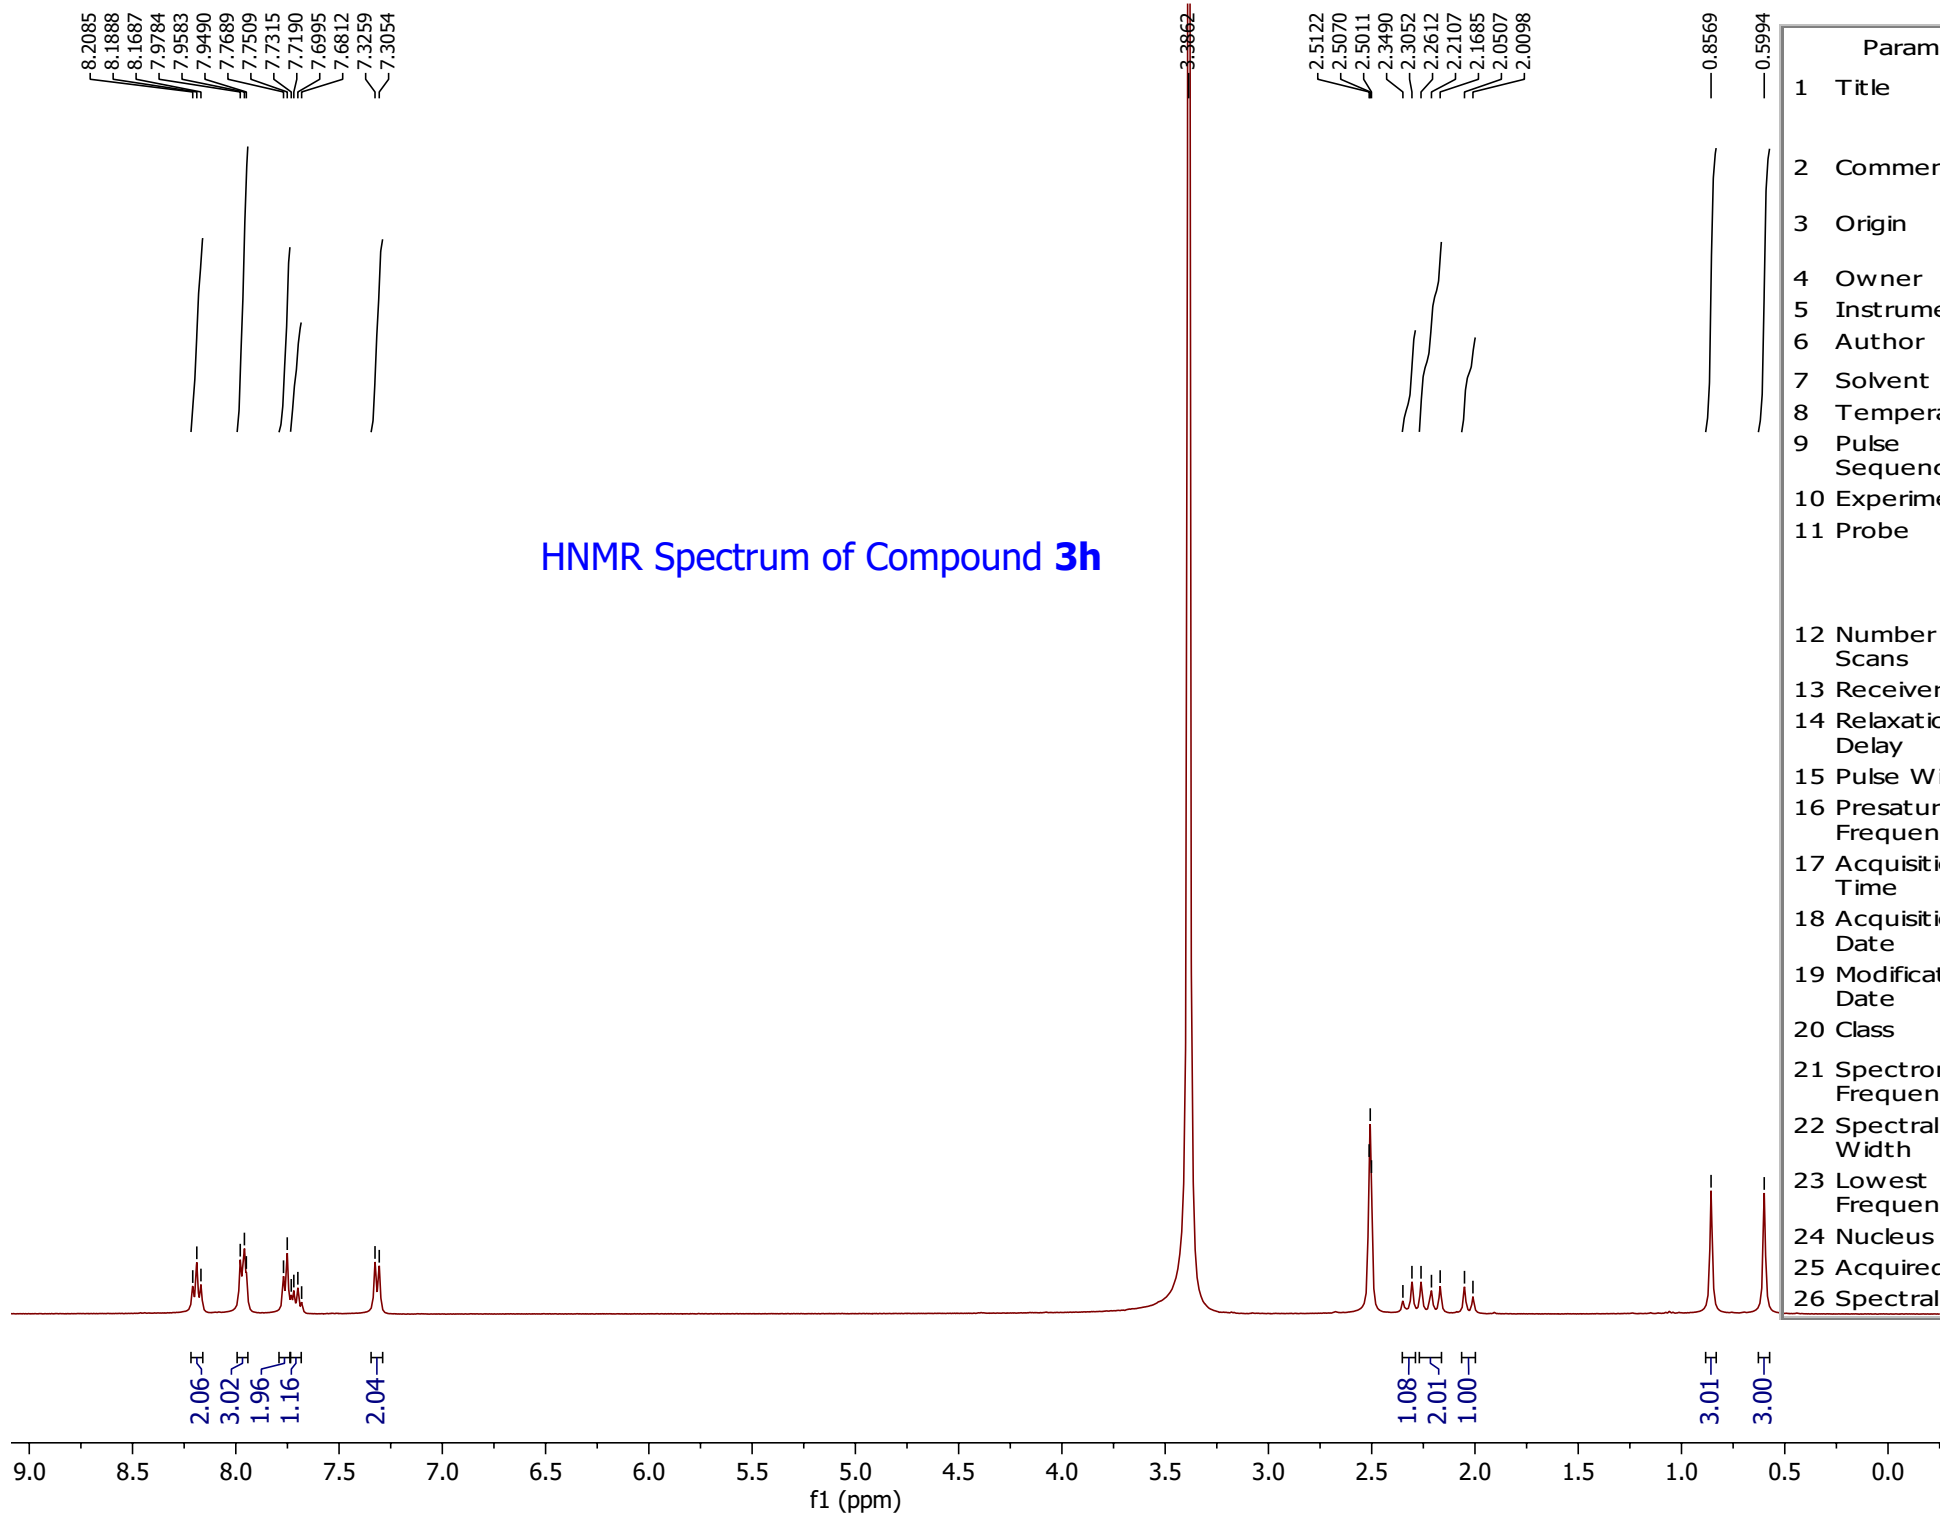

### HNMR Spectrum of Compound **3h**

| Parameter                  | Value                                          |
|----------------------------|------------------------------------------------|
| 1 Title                    | 190131-Sample 13.10.fid                        |
| 2 Comment                  | 190131-Sample 13                               |
| 3 Origin                   | Bruker BioSpin GmbH                            |
| 4 Owner                    | nmr                                            |
| 5 Instrument               | spect                                          |
| 6 Author                   |                                                |
| 7 Solvent                  | DMSO                                           |
| 8 Temperature              | 296.7                                          |
| 9 Pulse Sequence           | zg30                                           |
| 10 Experiment              | 1D                                             |
| 11 Probe                   | Z108618_016 6 (PA BBO 400S1 BBF-H-D-05 Z PLUS) |
| 12 Number of Scans         | 16                                             |
| 13 Receiver Gain           | 114.0                                          |
| 14 Relaxation Delay        | 1.0000                                         |
| 15 Pulse Width             | 14.0000                                        |
| 16 Presaturation Frequency |                                                |
| 17 Acquisition Time        | 4.0894                                         |
| 18 Acquisition Date        | 2019-01-31T 11:57:13                           |
| 19 Modification Date       | 2019-01-31T 17:27:14                           |
| 20 Class                   |                                                |
| 21 Spectrometer Frequency  | 400.13                                         |
| 22 Spectral Width          | 8012.8                                         |
| 23 Lowest Frequency        | -1535.6                                        |
| 24 Nucleus                 | 1H                                             |
| 25 Acquired Size           | 32768                                          |
| 26 Spectral Size           | 65536                                          |

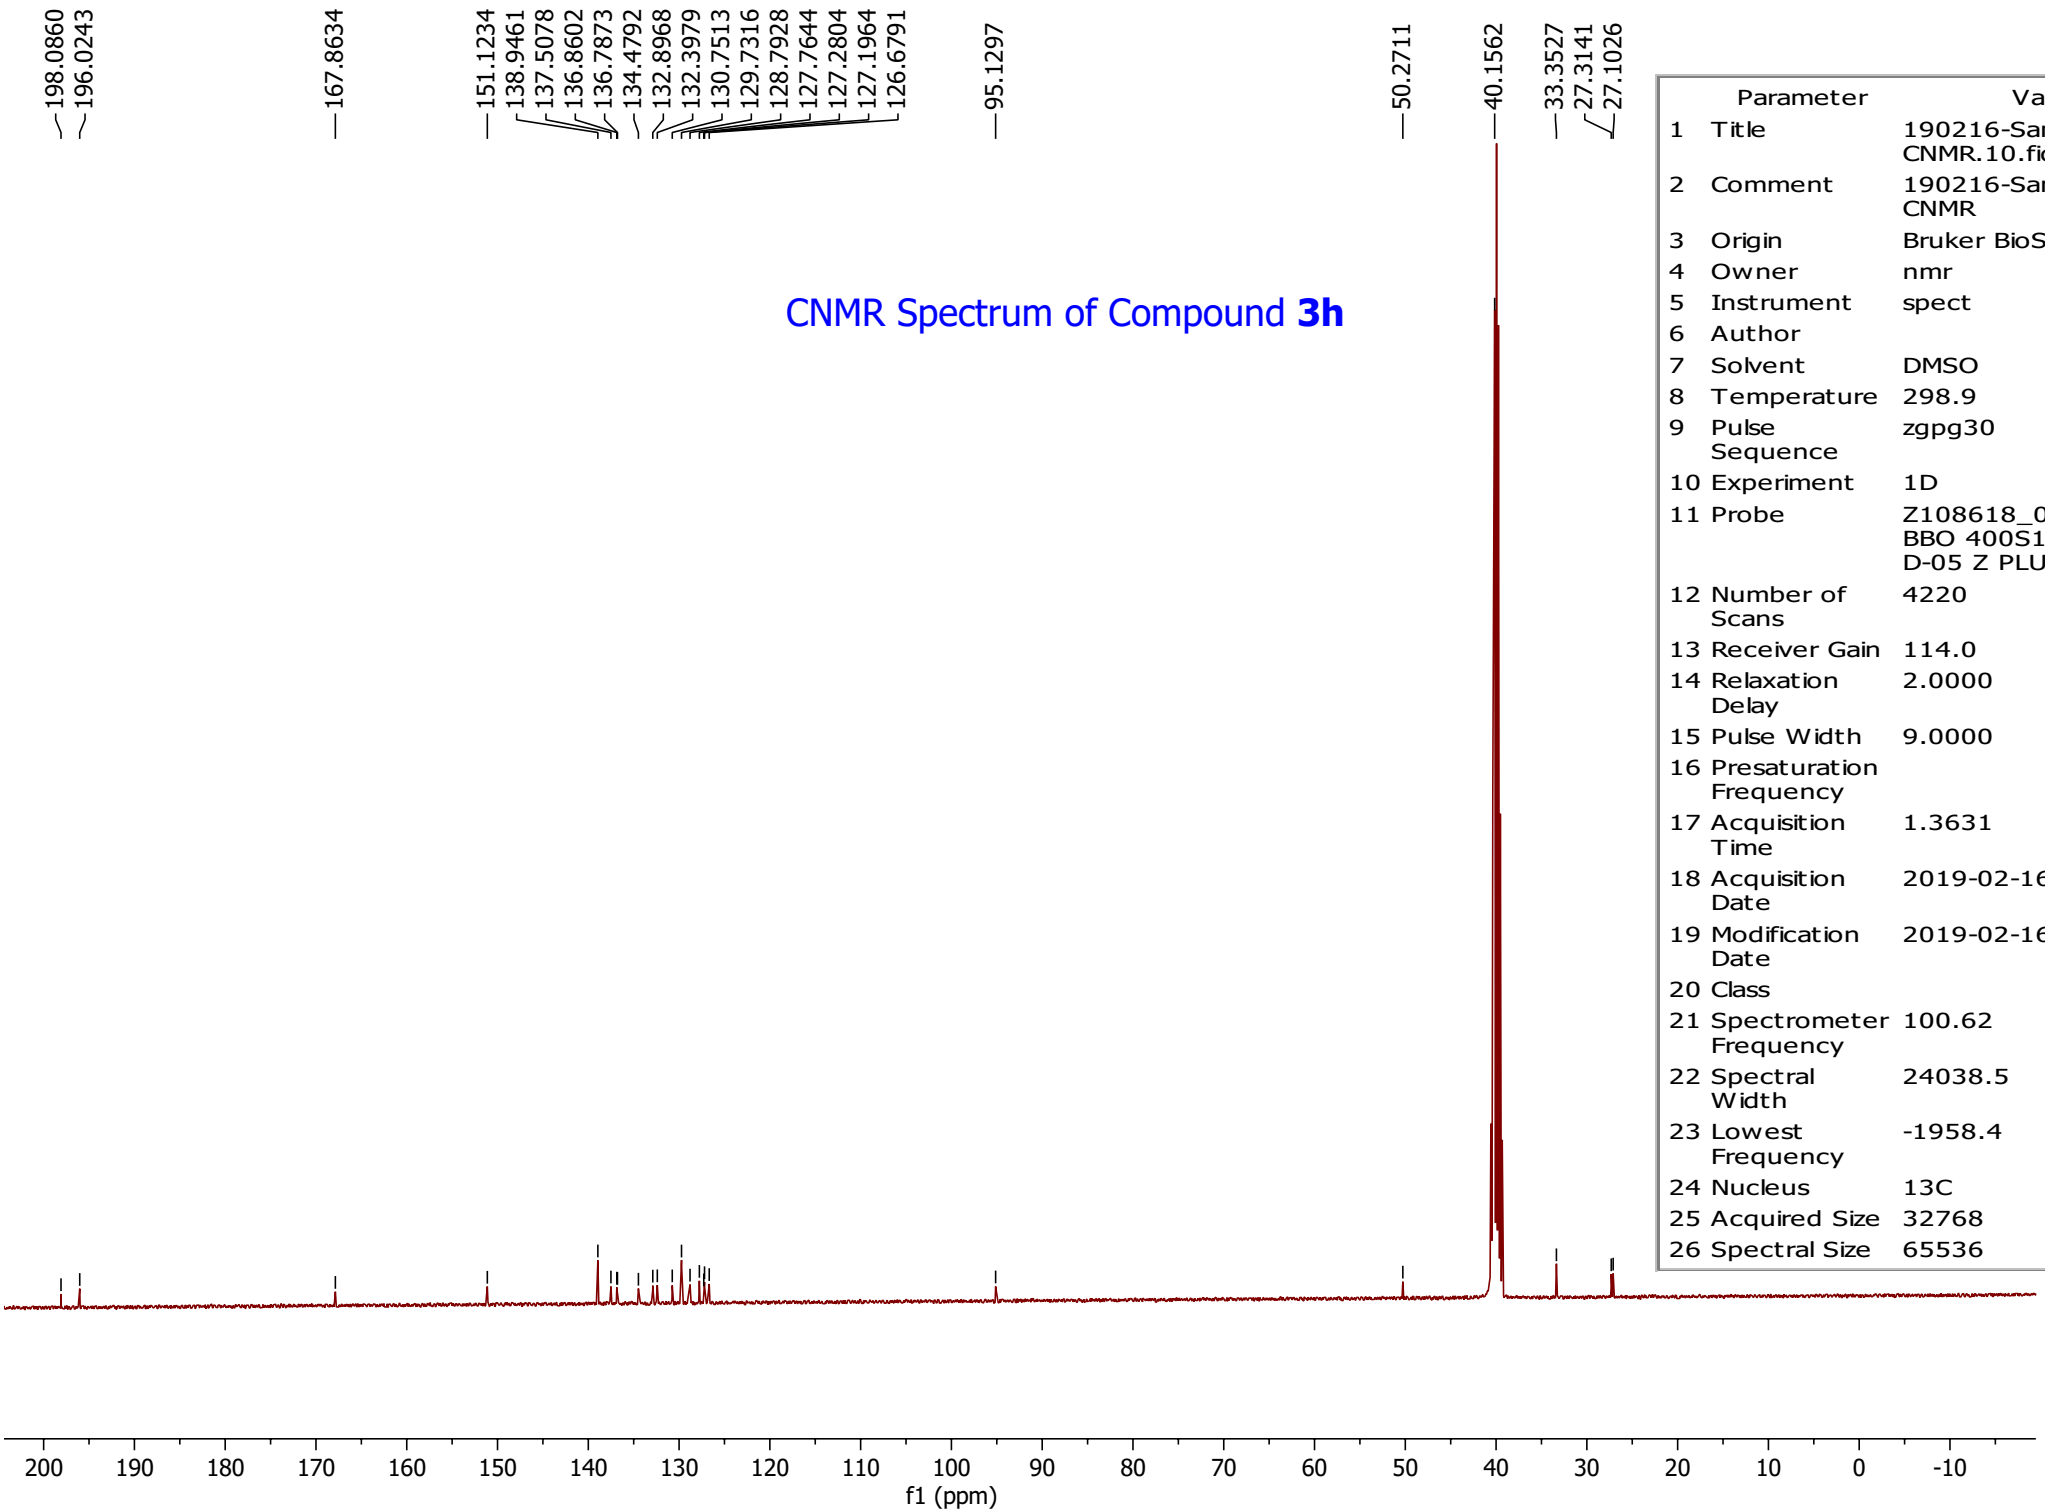

| Parameter                  | Value                                         |
|----------------------------|-----------------------------------------------|
| 1 Title                    | 190216-Sample 13-CNMR.10.fid                  |
| 2 Comment                  | 190216-Sample 13-CNMR                         |
| 3 Origin                   | Bruker BioSpin GmbH                           |
| 4 Owner                    | nmr                                           |
| 5 Instrument               | spect                                         |
| 6 Author                   |                                               |
| 7 Solvent                  | DMSO                                          |
| 8 Temperature              | 298.9                                         |
| 9 Pulse Sequence           | zgpg30                                        |
| 10 Experiment              | 1D                                            |
| 11 Probe                   | Z108618_0166 (PA BBO 400S1 BBF-H-D-05 Z PLUS) |
| 12 Number of Scans         | 4220                                          |
| 13 Receiver Gain           | 114.0                                         |
| 14 Relaxation Delay        | 2.0000                                        |
| 15 Pulse Width             | 9.0000                                        |
| 16 Presaturation Frequency |                                               |
| 17 Acquisition Time        | 1.3631                                        |
| 18 Acquisition Date        | 2019-02-16T16:16:10                           |
| 19 Modification Date       | 2019-02-16T21:46:12                           |
| 20 Class                   |                                               |
| 21 Spectrometer Frequency  | 100.62                                        |
| 22 Spectral Width          | 24038.5                                       |
| 23 Lowest Frequency        | -1958.4                                       |
| 24 Nucleus                 | 13C                                           |
| 25 Acquired Size           | 32768                                         |
| 26 Spectral Size           | 65536                                         |

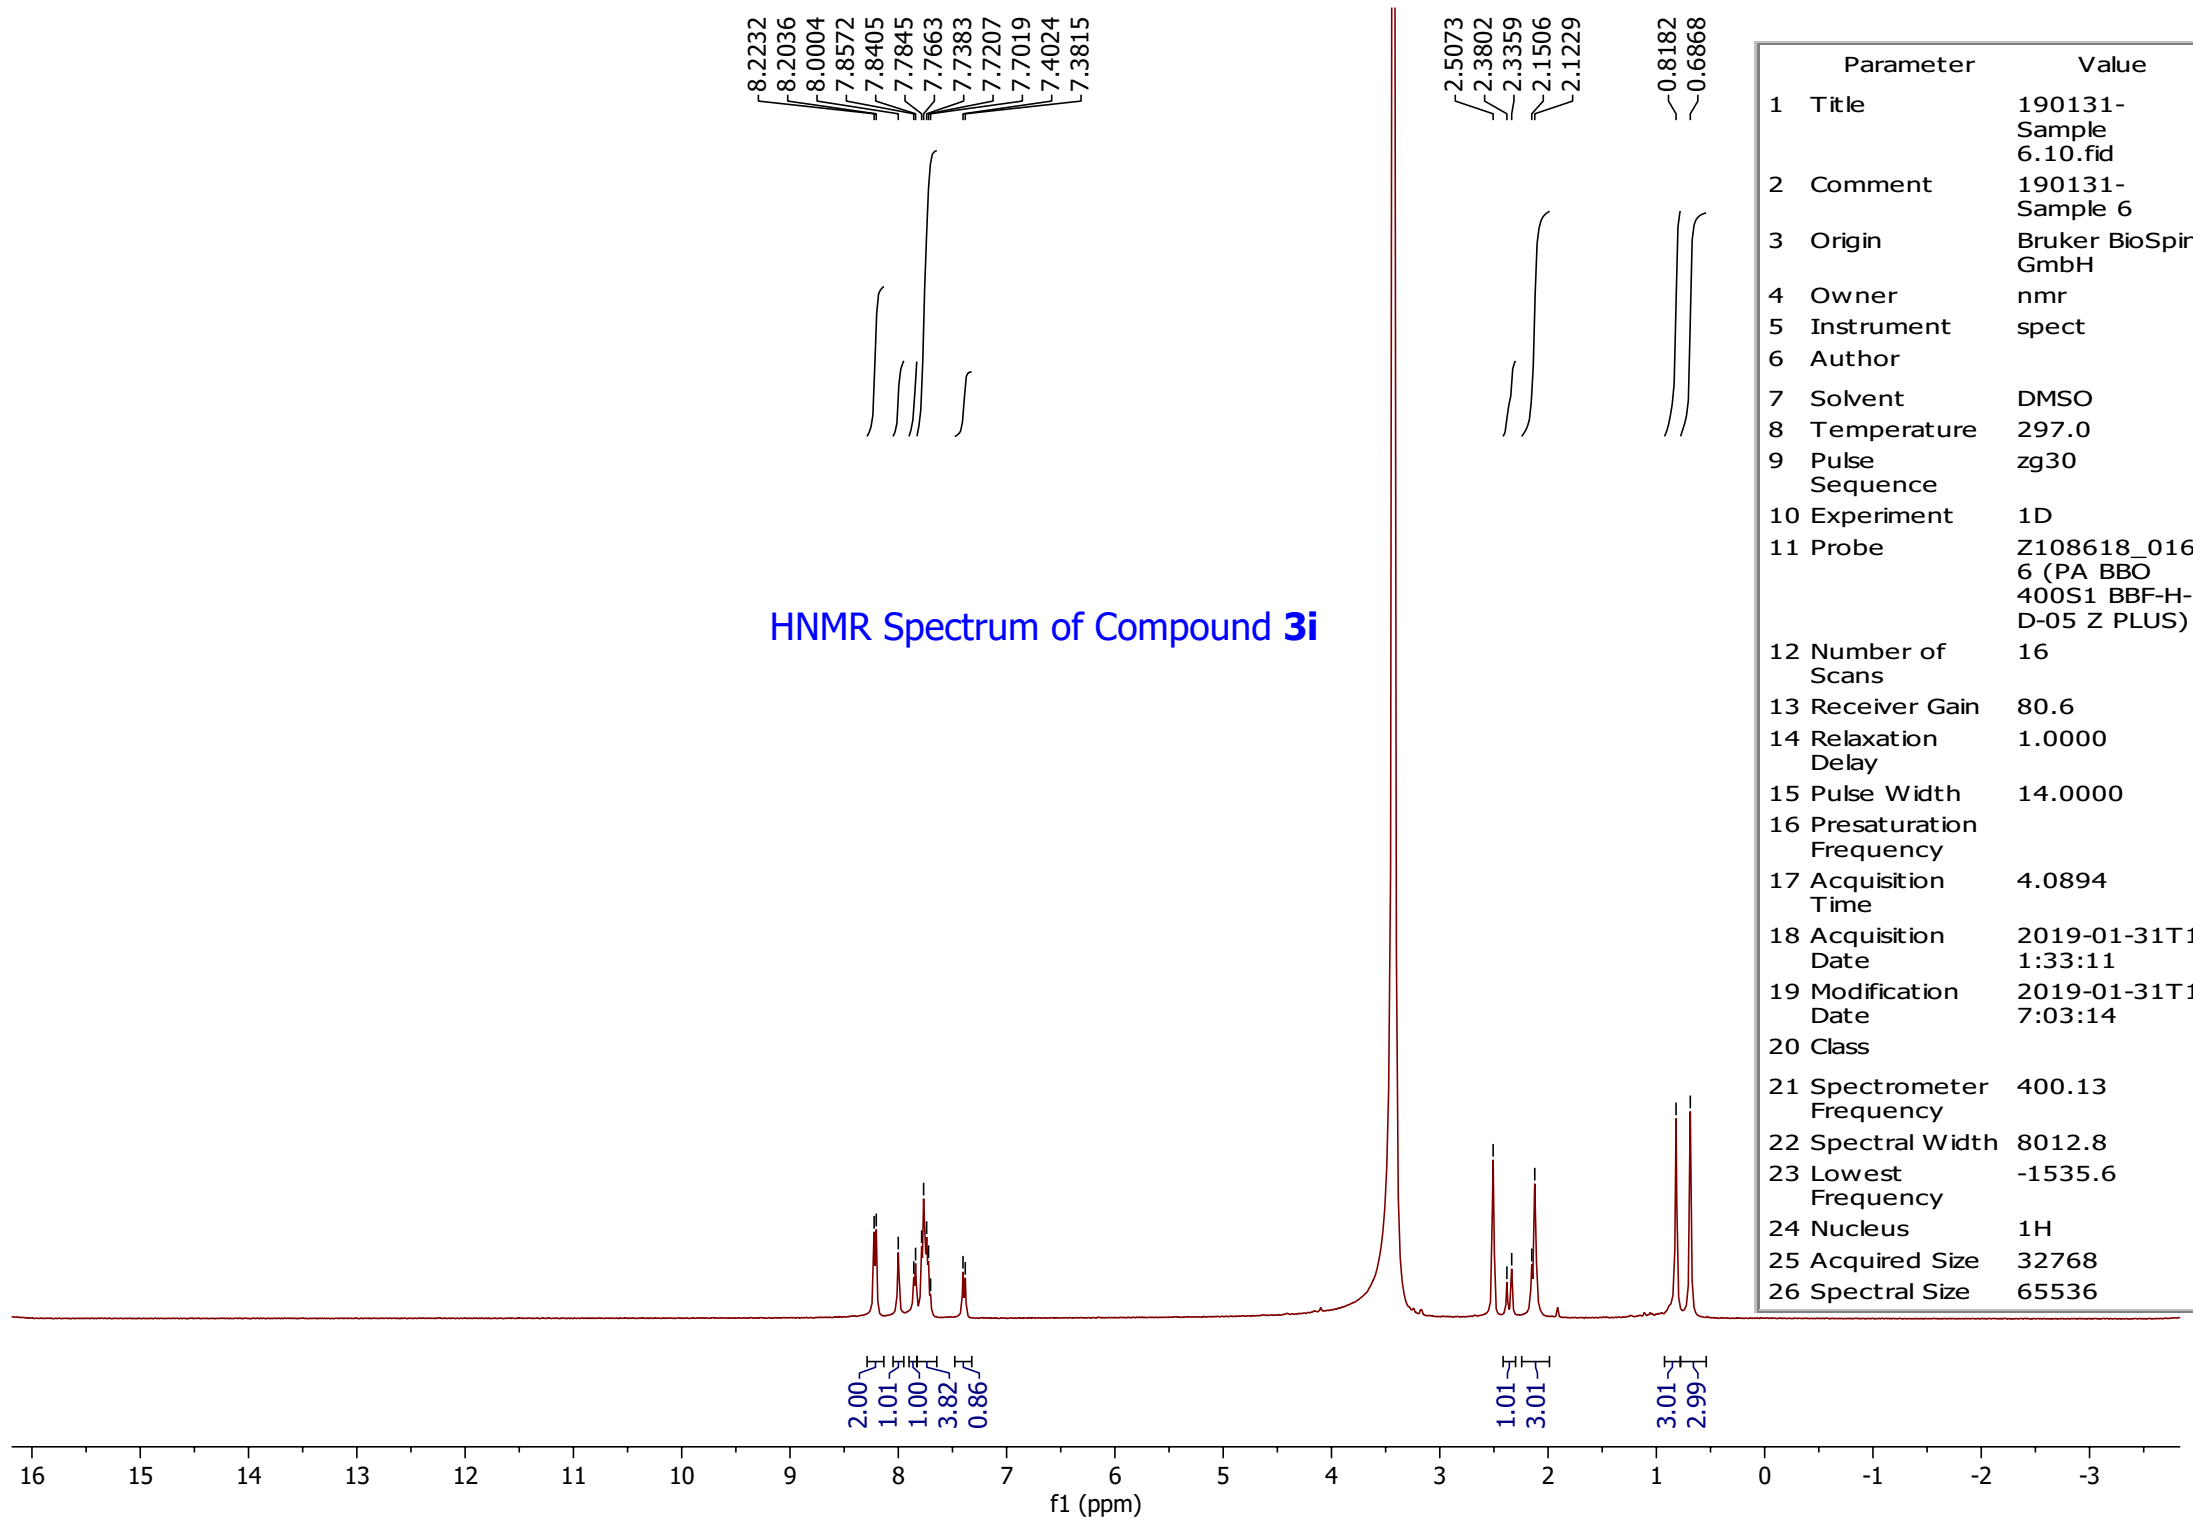

8.2232  
8.2036  
8.0004  
7.8572  
7.8405  
7.7845  
7.7663  
7.7383  
7.7207  
7.7019  
7.4024  
7.3815

2.5073  
2.3802  
2.3359  
2.1506  
2.1229

0.8182  
0.6868

2.00  
1.01  
1.00  
3.82  
0.86

1.01  
3.01

3.01  
2.99

f1 (ppm)



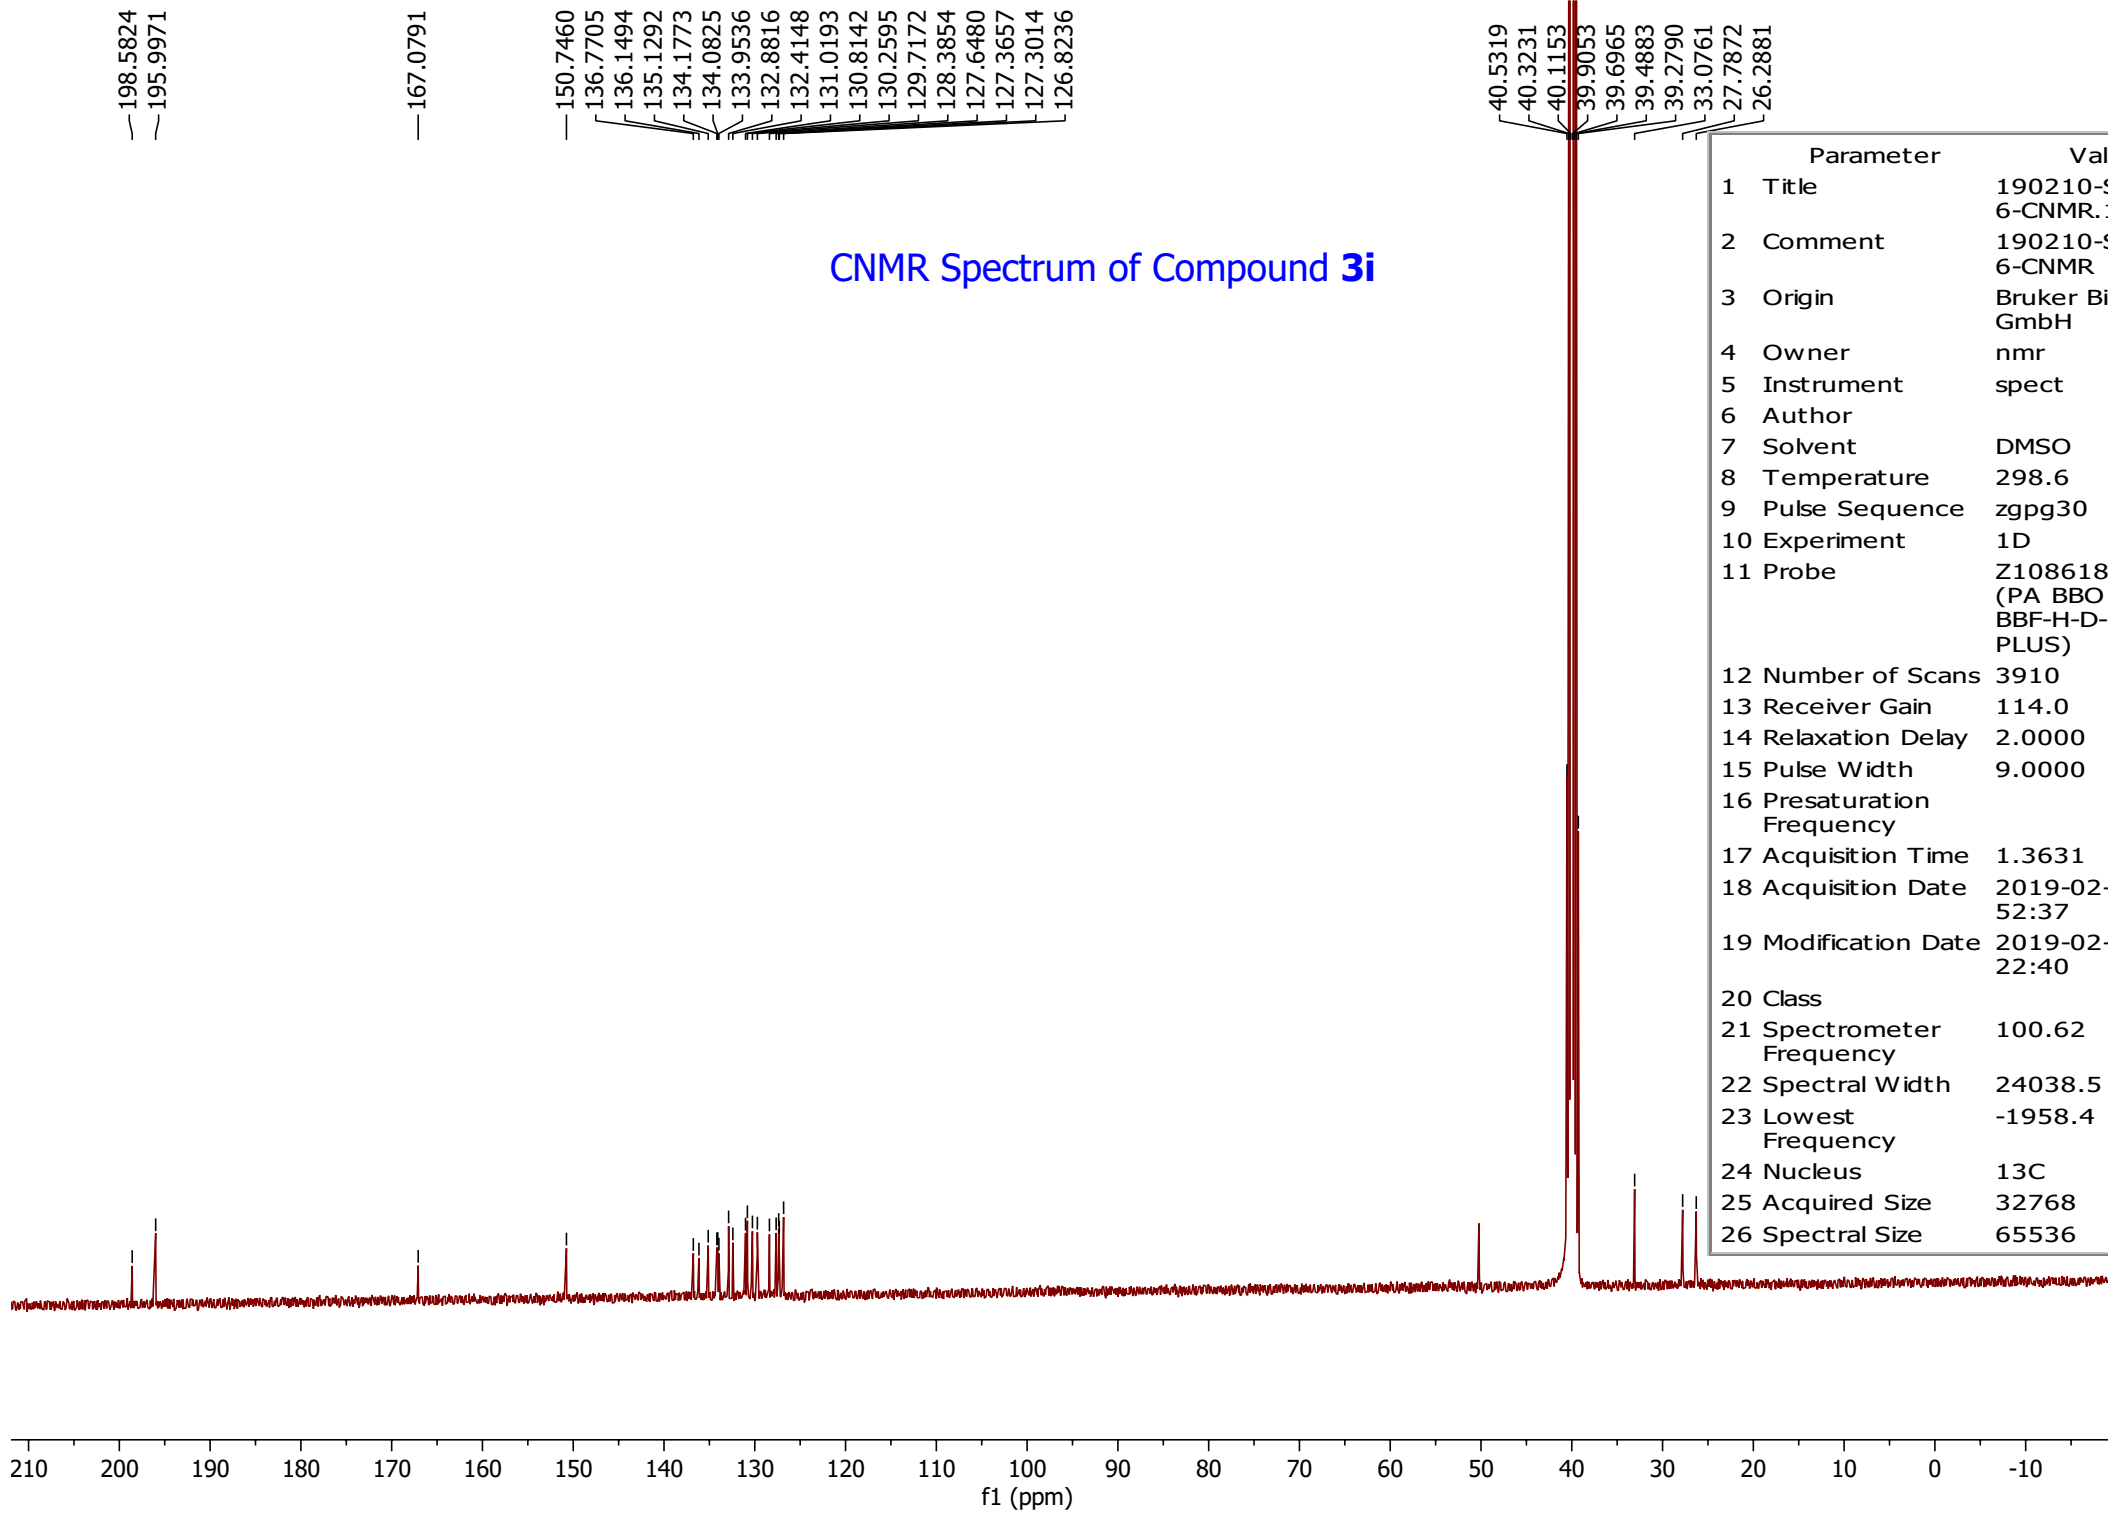

| Parameter                  | Value                                         |
|----------------------------|-----------------------------------------------|
| 1 Title                    | 190210-Sample 6-CNMR.10.fid                   |
| 2 Comment                  | 190210-Sample 6-CNMR                          |
| 3 Origin                   | Bruker BioSpin GmbH                           |
| 4 Owner                    | nmr                                           |
| 5 Instrument               | spect                                         |
| 6 Author                   |                                               |
| 7 Solvent                  | DMSO                                          |
| 8 Temperature              | 298.6                                         |
| 9 Pulse Sequence           | zgpg30                                        |
| 10 Experiment              | 1D                                            |
| 11 Probe                   | Z108618_0166 (PA BBO 400S1 BBF-H-D-05 Z PLUS) |
| 12 Number of Scans         | 3910                                          |
| 13 Receiver Gain           | 114.0                                         |
| 14 Relaxation Delay        | 2.0000                                        |
| 15 Pulse Width             | 9.0000                                        |
| 16 Presaturation Frequency |                                               |
| 17 Acquisition Time        | 1.3631                                        |
| 18 Acquisition Date        | 2019-02-10T10:52:37                           |
| 19 Modification Date       | 2019-02-10T16:22:40                           |
| 20 Class                   |                                               |
| 21 Spectrometer Frequency  | 100.62                                        |
| 22 Spectral Width          | 24038.5                                       |
| 23 Lowest Frequency        | -1958.4                                       |
| 24 Nucleus                 | 13C                                           |
| 25 Acquired Size           | 32768                                         |
| 26 Spectral Size           | 65536                                         |

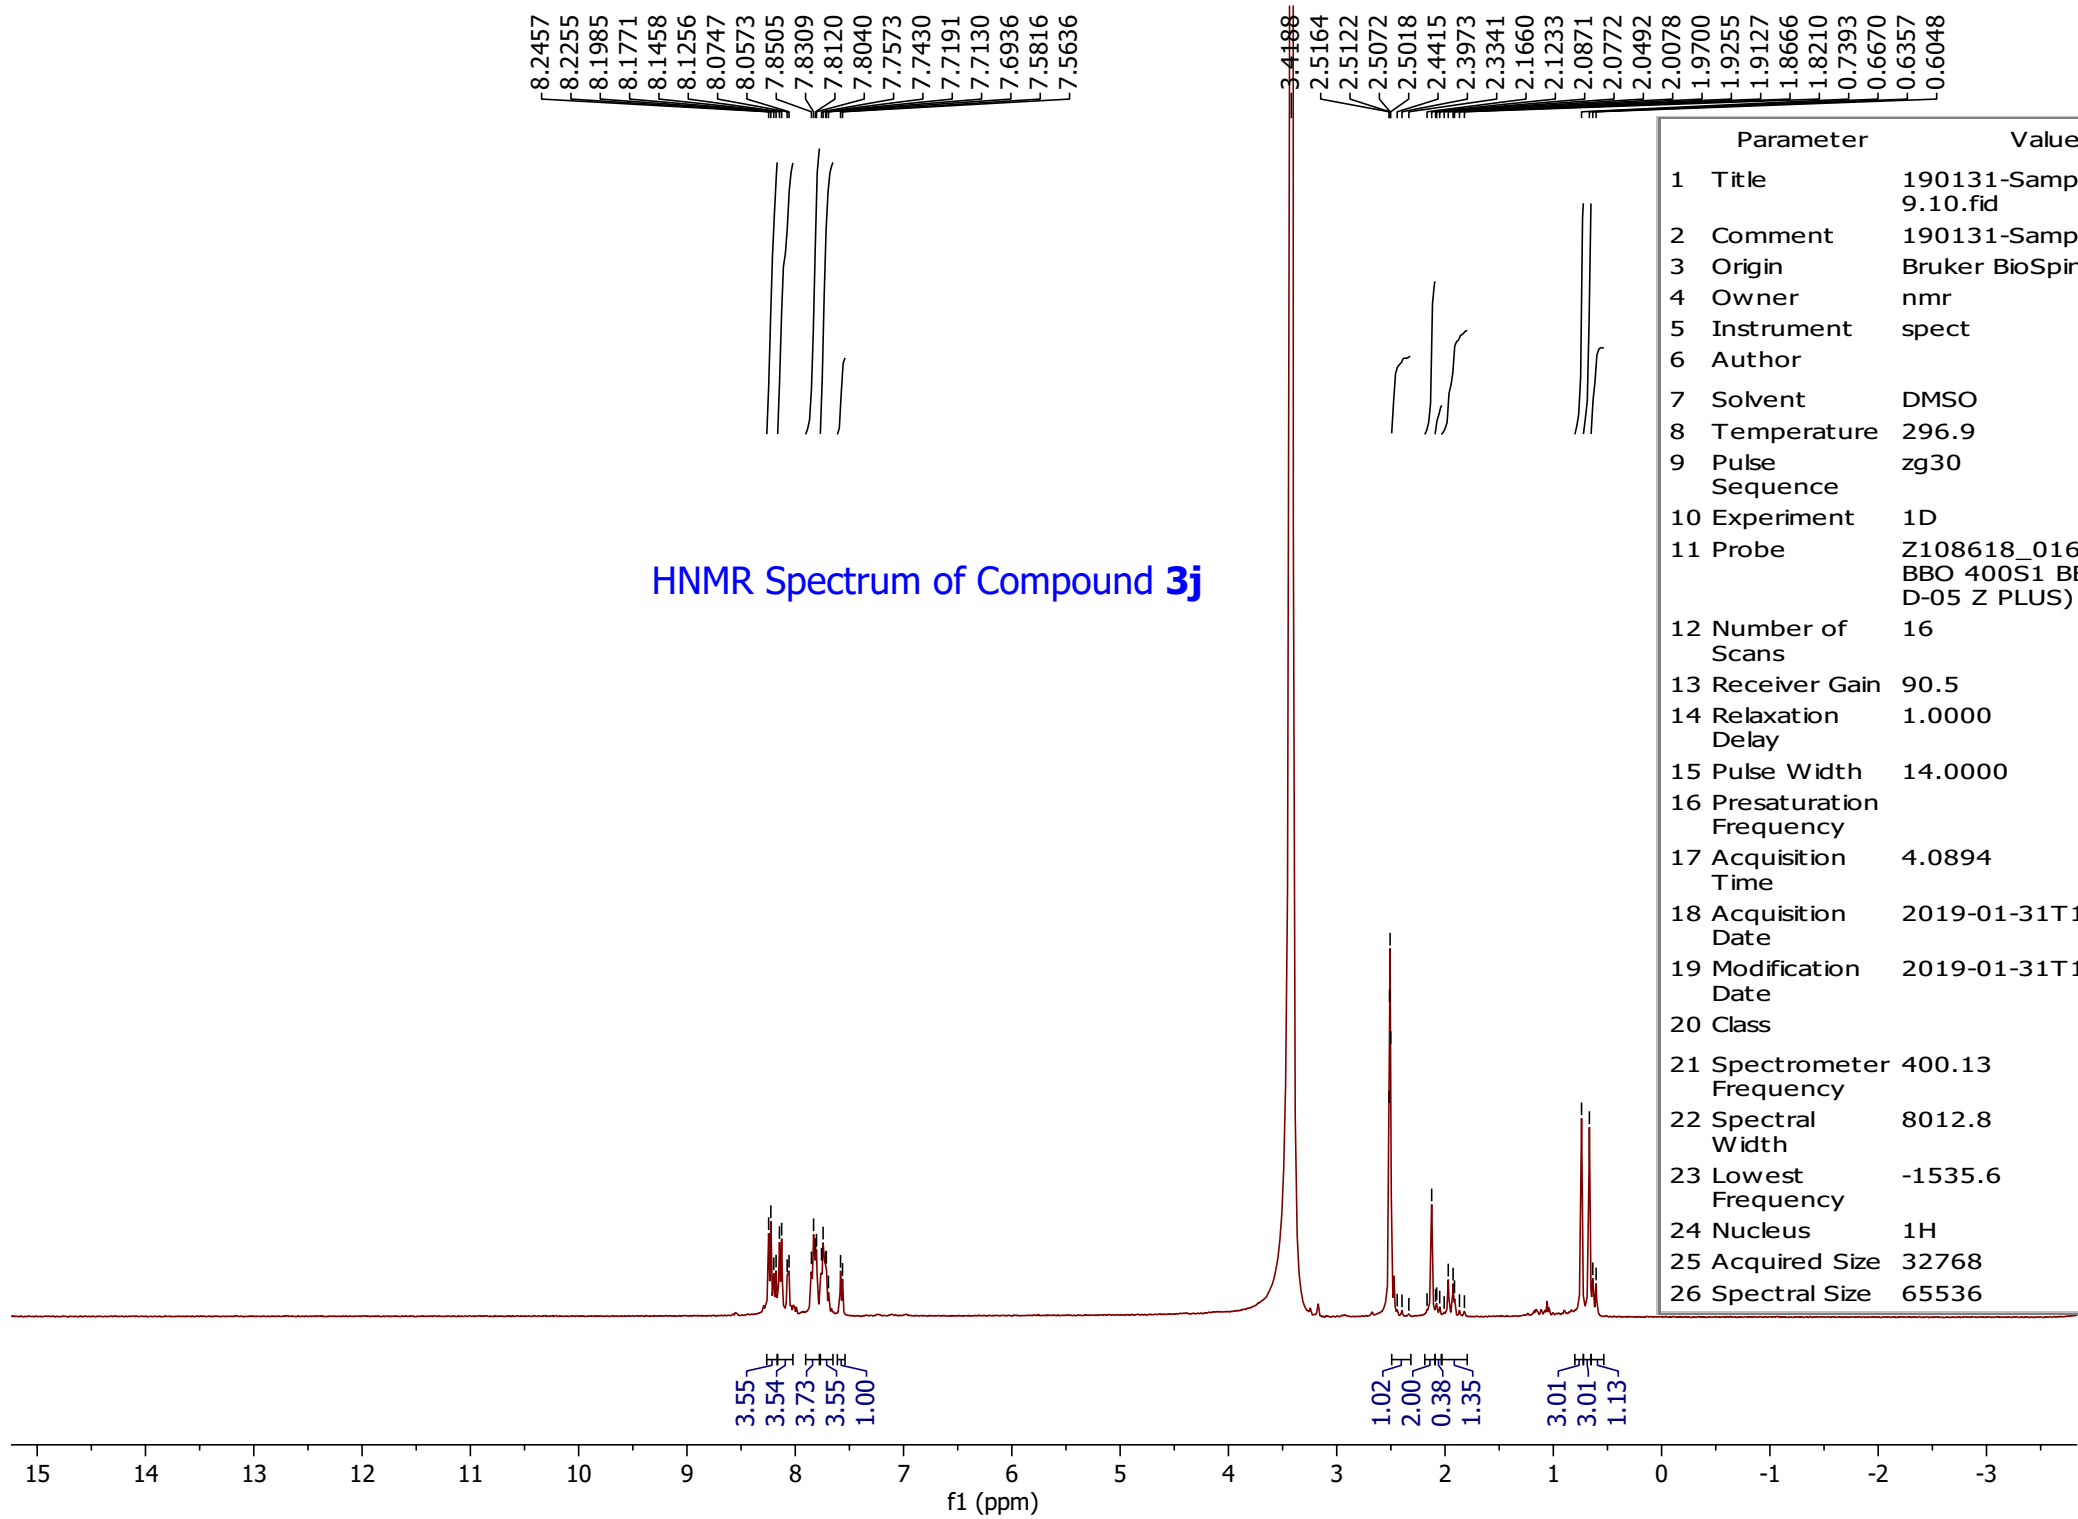

8.2457  
8.2255  
8.1985  
8.1771  
8.1458  
8.1256  
8.0747  
8.0573  
7.8505  
7.8309  
7.8120  
7.8040  
7.7573  
7.7430  
7.7191  
7.7130  
7.6936  
7.5816  
7.5636

3.4188  
2.5164  
2.5122  
2.5072  
2.5018  
2.4415  
2.3973  
2.3341  
2.1660  
2.1233  
2.0871  
2.0772  
2.0492  
2.0078  
1.9700  
1.9255  
1.9127  
1.8666  
1.8210  
0.7393  
0.6670  
0.6357  
0.6048

3.55  
3.54  
3.73  
3.55  
1.00

1.02  
2.00  
0.38  
1.35

3.01  
3.01  
1.13

f1 (ppm)

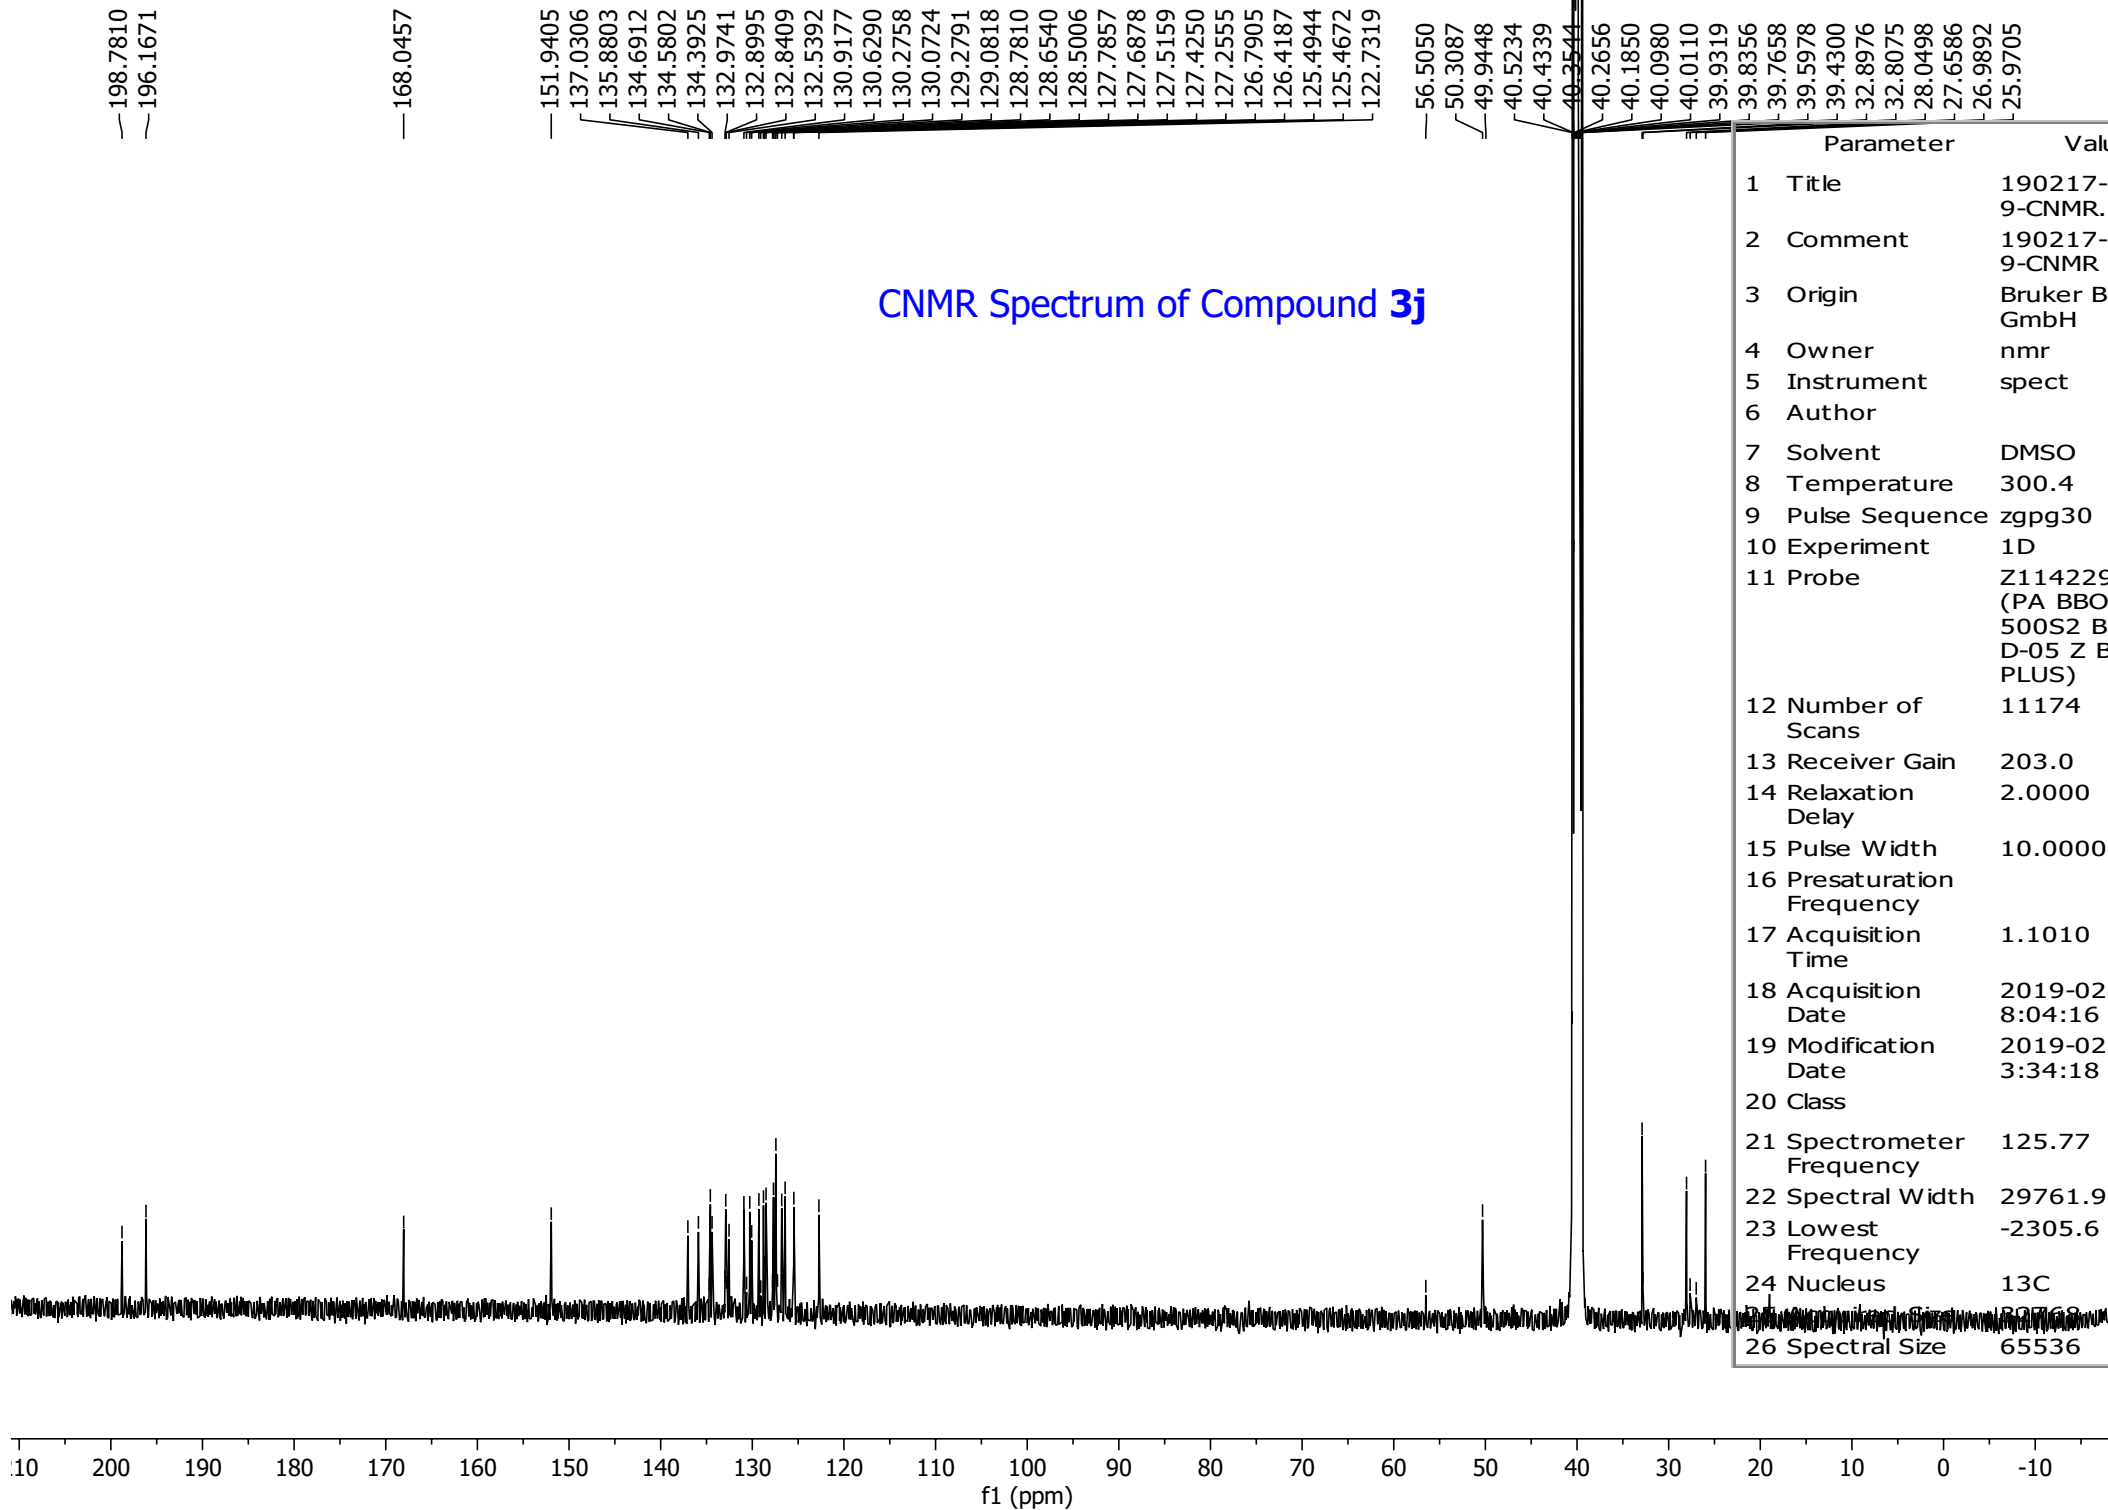

- 198.7810
- 196.1671
- 168.0457
- 151.9405
- 137.0306
- 135.8803
- 134.6912
- 134.5802
- 134.3925
- 132.9741
- 132.8995
- 132.8409
- 132.5392
- 130.9177
- 130.6290
- 130.2758
- 130.0724
- 129.2791
- 129.0818
- 128.7810
- 128.6540
- 128.5006
- 127.7857
- 127.6878
- 127.5159
- 127.4250
- 127.2555
- 126.7905
- 126.4187
- 125.4944
- 125.4672
- 122.7319
- 56.5050
- 50.3087
- 49.9448
- 40.5234
- 40.4339
- 40.3544
- 40.2656
- 40.1850
- 40.0980
- 40.0110
- 39.9319
- 39.8356
- 39.7658
- 39.5978
- 39.4300
- 32.8976
- 32.8075
- 28.0498
- 27.6586
- 26.9892
- 25.9705

| Parameter                  | Value                                             |
|----------------------------|---------------------------------------------------|
| 1 Title                    | 190217-Sample 9-CNMR.10.fid                       |
| 2 Comment                  | 190217-Sample 9-CNMR                              |
| 3 Origin                   | Bruker BioSpin GmbH                               |
| 4 Owner                    | nmr                                               |
| 5 Instrument               | spect                                             |
| 6 Author                   |                                                   |
| 7 Solvent                  | DMSO                                              |
| 8 Temperature              | 300.4                                             |
| 9 Pulse Sequence           | zgpg30                                            |
| 10 Experiment              | 1D                                                |
| 11 Probe                   | Z114229_0007 (PA BBO 500S2 BBF-H-D-05 Z BTO PLUS) |
| 12 Number of Scans         | 11174                                             |
| 13 Receiver Gain           | 203.0                                             |
| 14 Relaxation Delay        | 2.0000                                            |
| 15 Pulse Width             | 10.0000                                           |
| 16 Presaturation Frequency |                                                   |
| 17 Acquisition Time        | 1.1010                                            |
| 18 Acquisition Date        | 2019-02-17T18:04:16                               |
| 19 Modification Date       | 2019-02-17T23:34:18                               |
| 20 Class                   |                                                   |
| 21 Spectrometer Frequency  | 125.77                                            |
| 22 Spectral Width          | 29761.9                                           |
| 23 Lowest Frequency        | -2305.6                                           |
| 24 Nucleus                 | 13C                                               |
| 25 File Size               | 80768                                             |
| 26 Spectral Size           | 65536                                             |

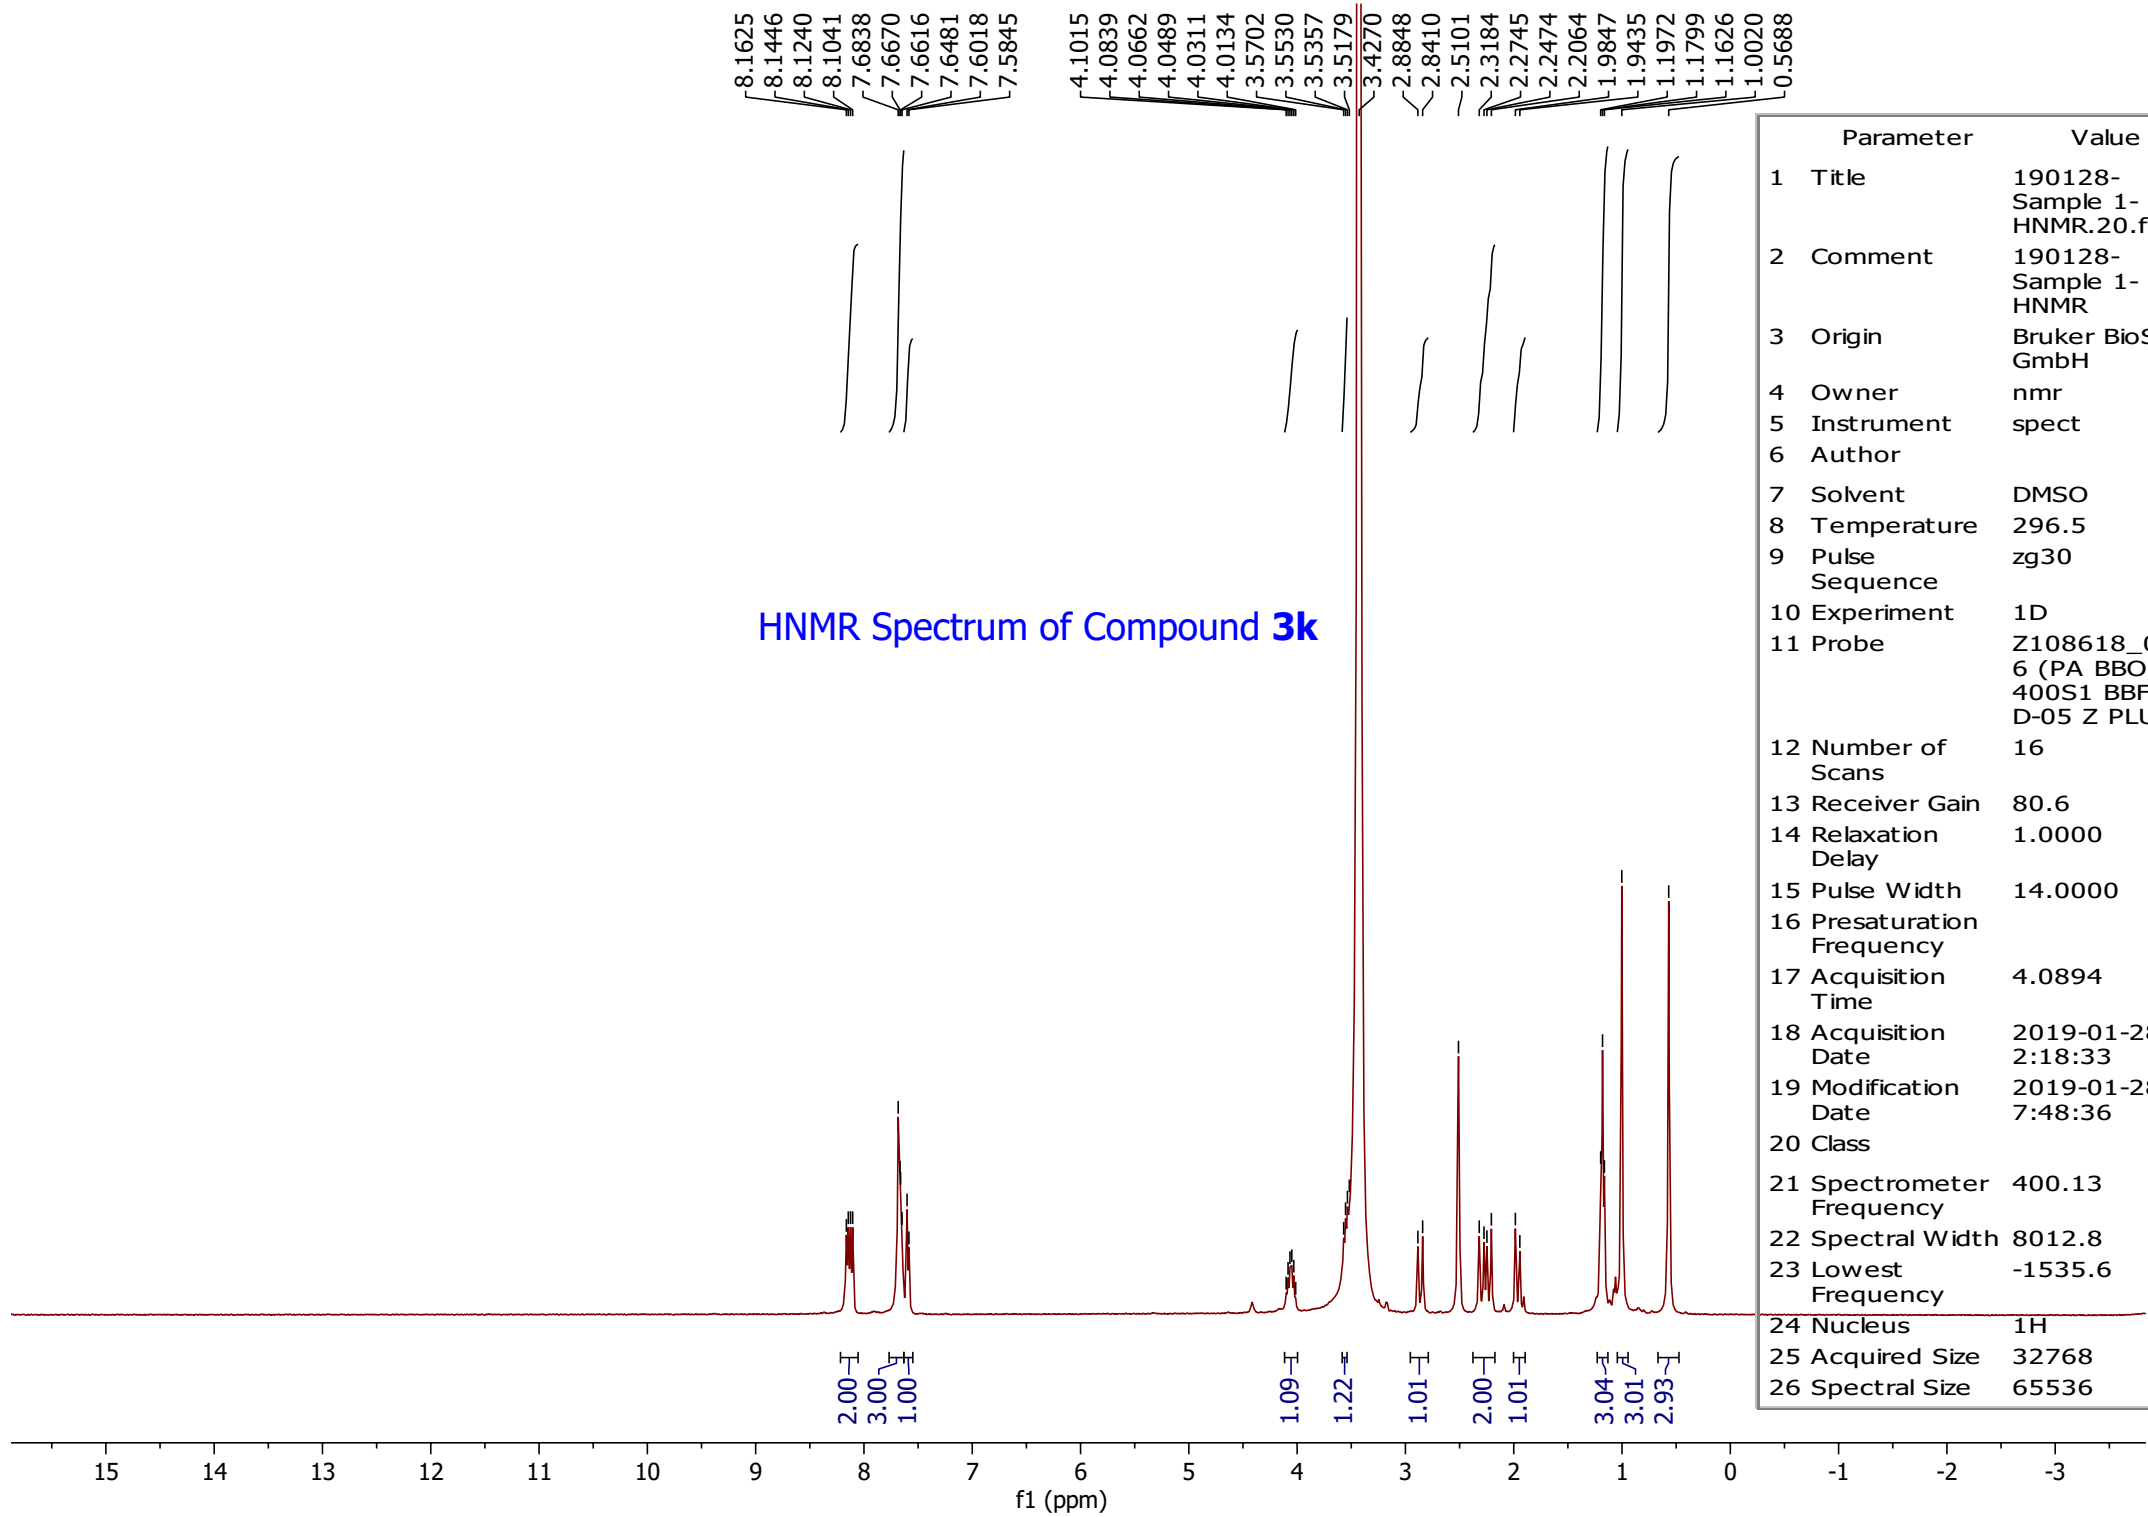

8.1625  
8.1446  
8.1240  
8.1041  
7.6838  
7.6670  
7.6616  
7.6481  
7.6018  
7.5845

4.1015  
4.0839  
4.0662  
4.0489  
4.0311  
4.0134  
3.5702  
3.5530  
3.5357  
3.5179  
3.4270  
2.8848  
2.8410  
2.5101  
2.3184  
2.2745  
2.2474  
2.2064  
1.9847  
1.9435  
1.1972  
1.1799  
1.1626  
1.0020  
0.5688

2.00  
3.00  
1.00

1.09  
1.22

1.01  
2.00  
1.01

3.04  
3.01  
2.93

f1 (ppm)

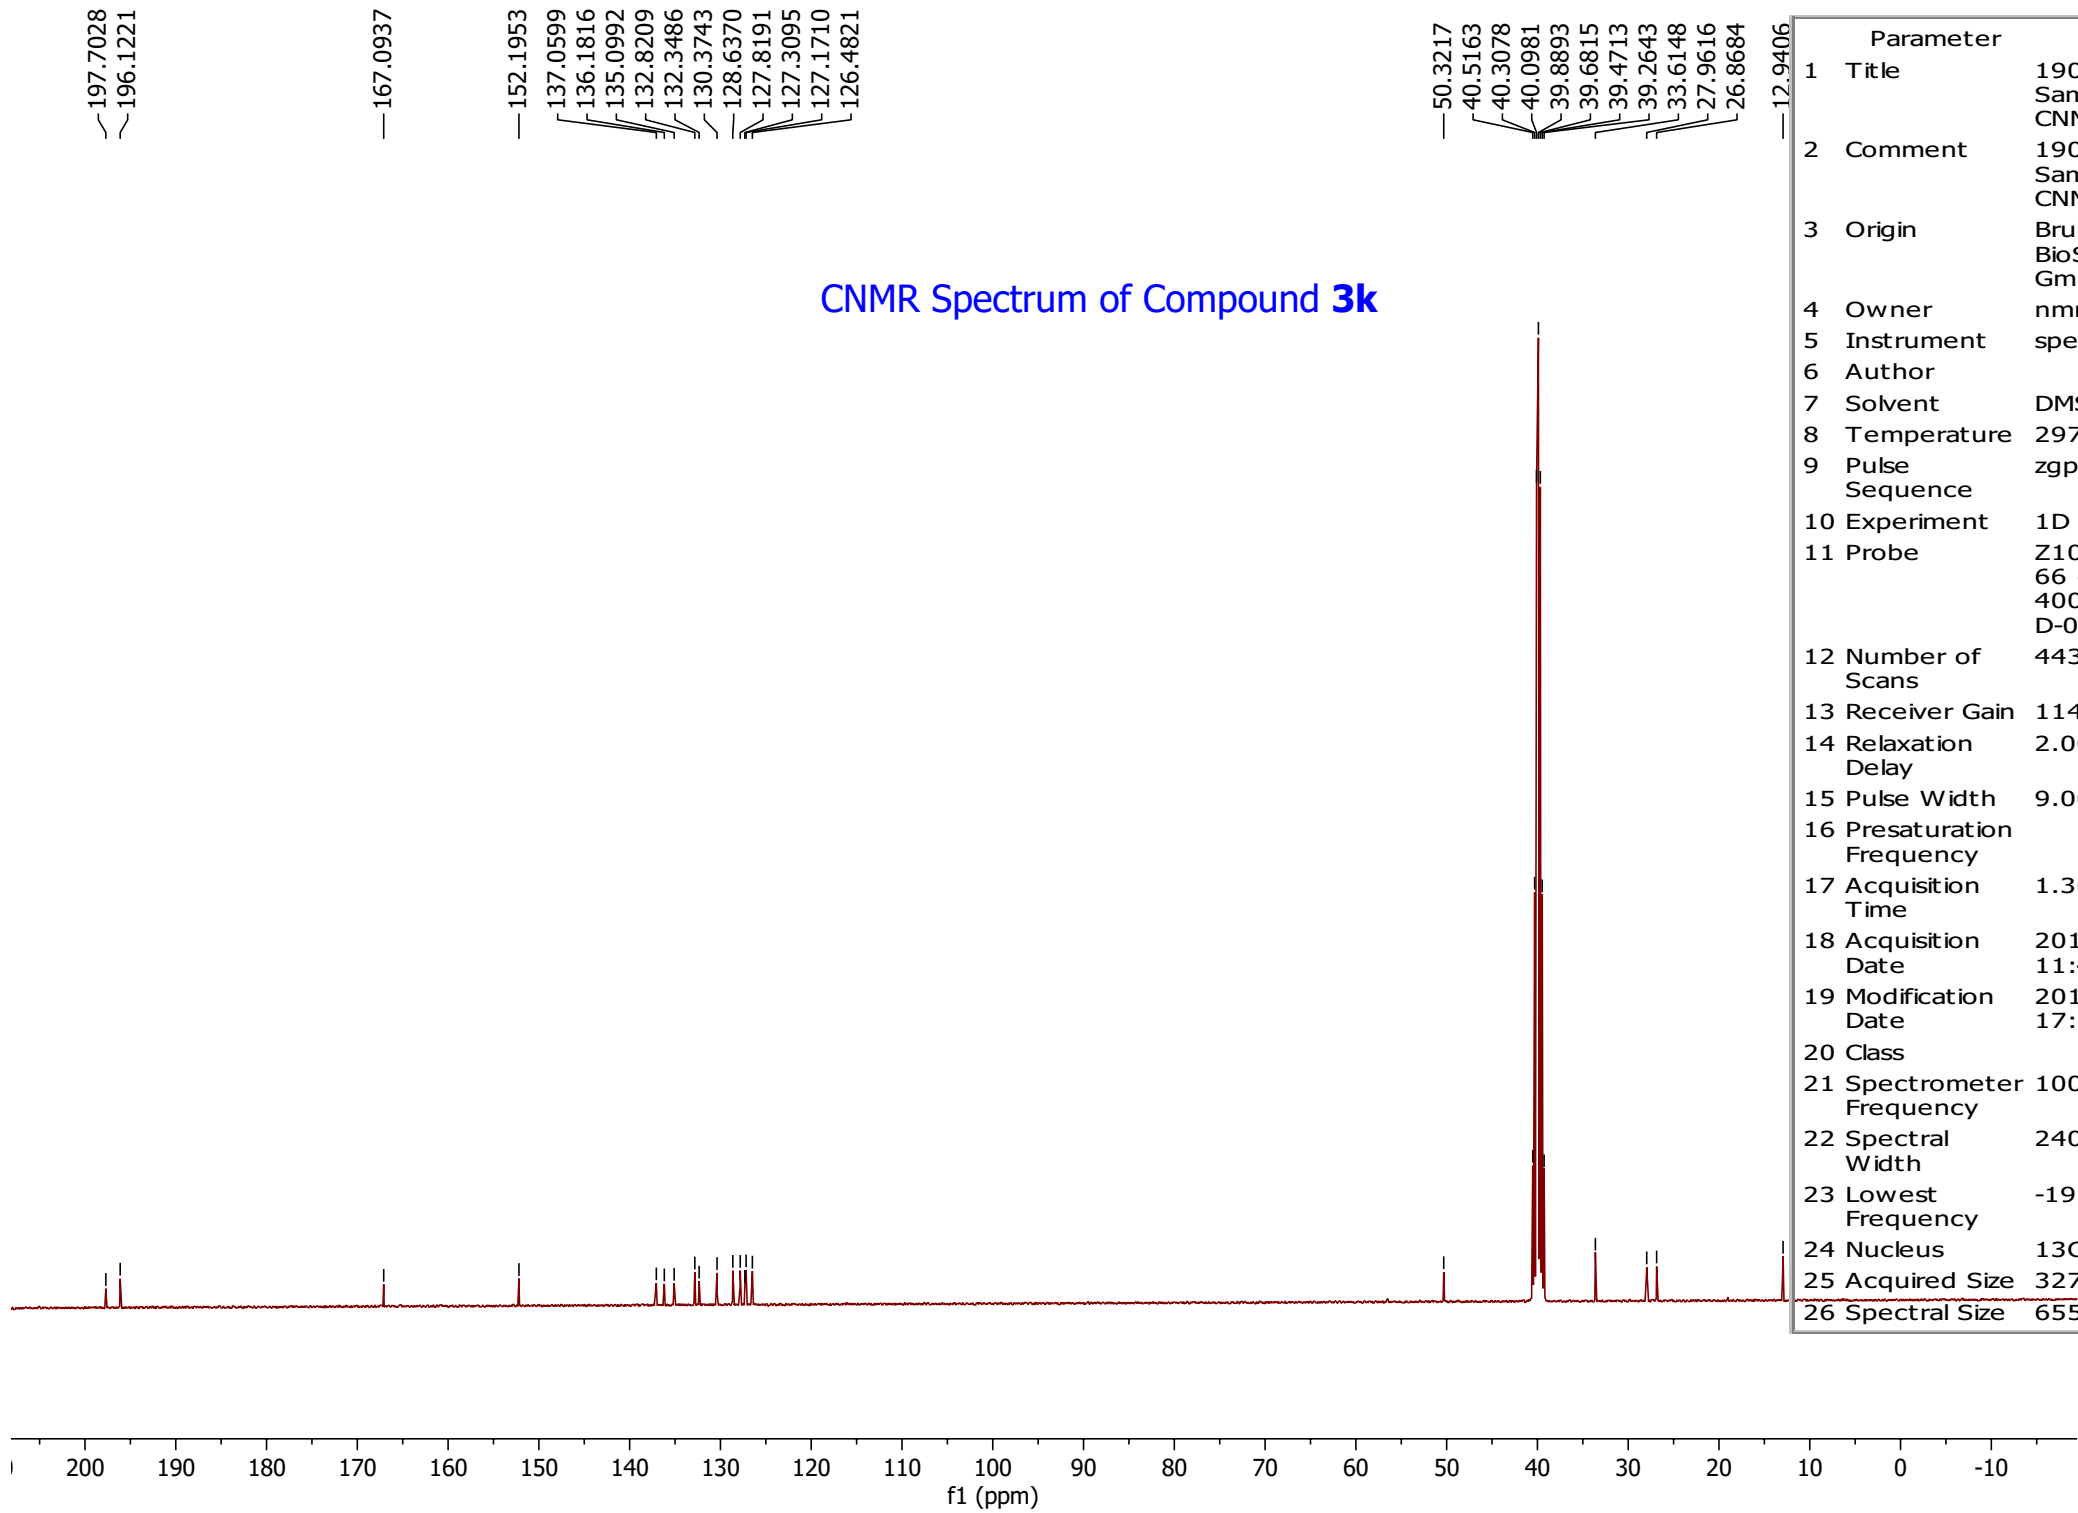

| Parameter                  | Value                                         |
|----------------------------|-----------------------------------------------|
| 1 Title                    | 190203-Sample 1-CNMR.10.fid                   |
| 2 Comment                  | 190203-Sample 1-CNMR                          |
| 3 Origin                   | Bruker BioSpin GmbH                           |
| 4 Owner                    | nmr                                           |
| 5 Instrument               | spect                                         |
| 6 Author                   |                                               |
| 7 Solvent                  | DMSO                                          |
| 8 Temperature              | 297.8                                         |
| 9 Pulse Sequence           | zgpg30                                        |
| 10 Experiment              | 1D                                            |
| 11 Probe                   | Z108618_0166 (PA BBO 400S1 BBF-H-D-05 Z PLUS) |
| 12 Number of Scans         | 4431                                          |
| 13 Receiver Gain           | 114.0                                         |
| 14 Relaxation Delay        | 2.0000                                        |
| 15 Pulse Width             | 9.0000                                        |
| 16 Presaturation Frequency |                                               |
| 17 Acquisition Time        | 1.3631                                        |
| 18 Acquisition Date        | 2019-02-03T 11:43:44                          |
| 19 Modification Date       | 2019-02-03T 17:13:46                          |
| 20 Class                   |                                               |
| 21 Spectrometer Frequency  | 100.62                                        |
| 22 Spectral Width          | 24038.5                                       |
| 23 Lowest Frequency        | -1958.4                                       |
| 24 Nucleus                 | 13C                                           |
| 25 Acquired Size           | 32768                                         |
| 26 Spectral Size           | 65536                                         |

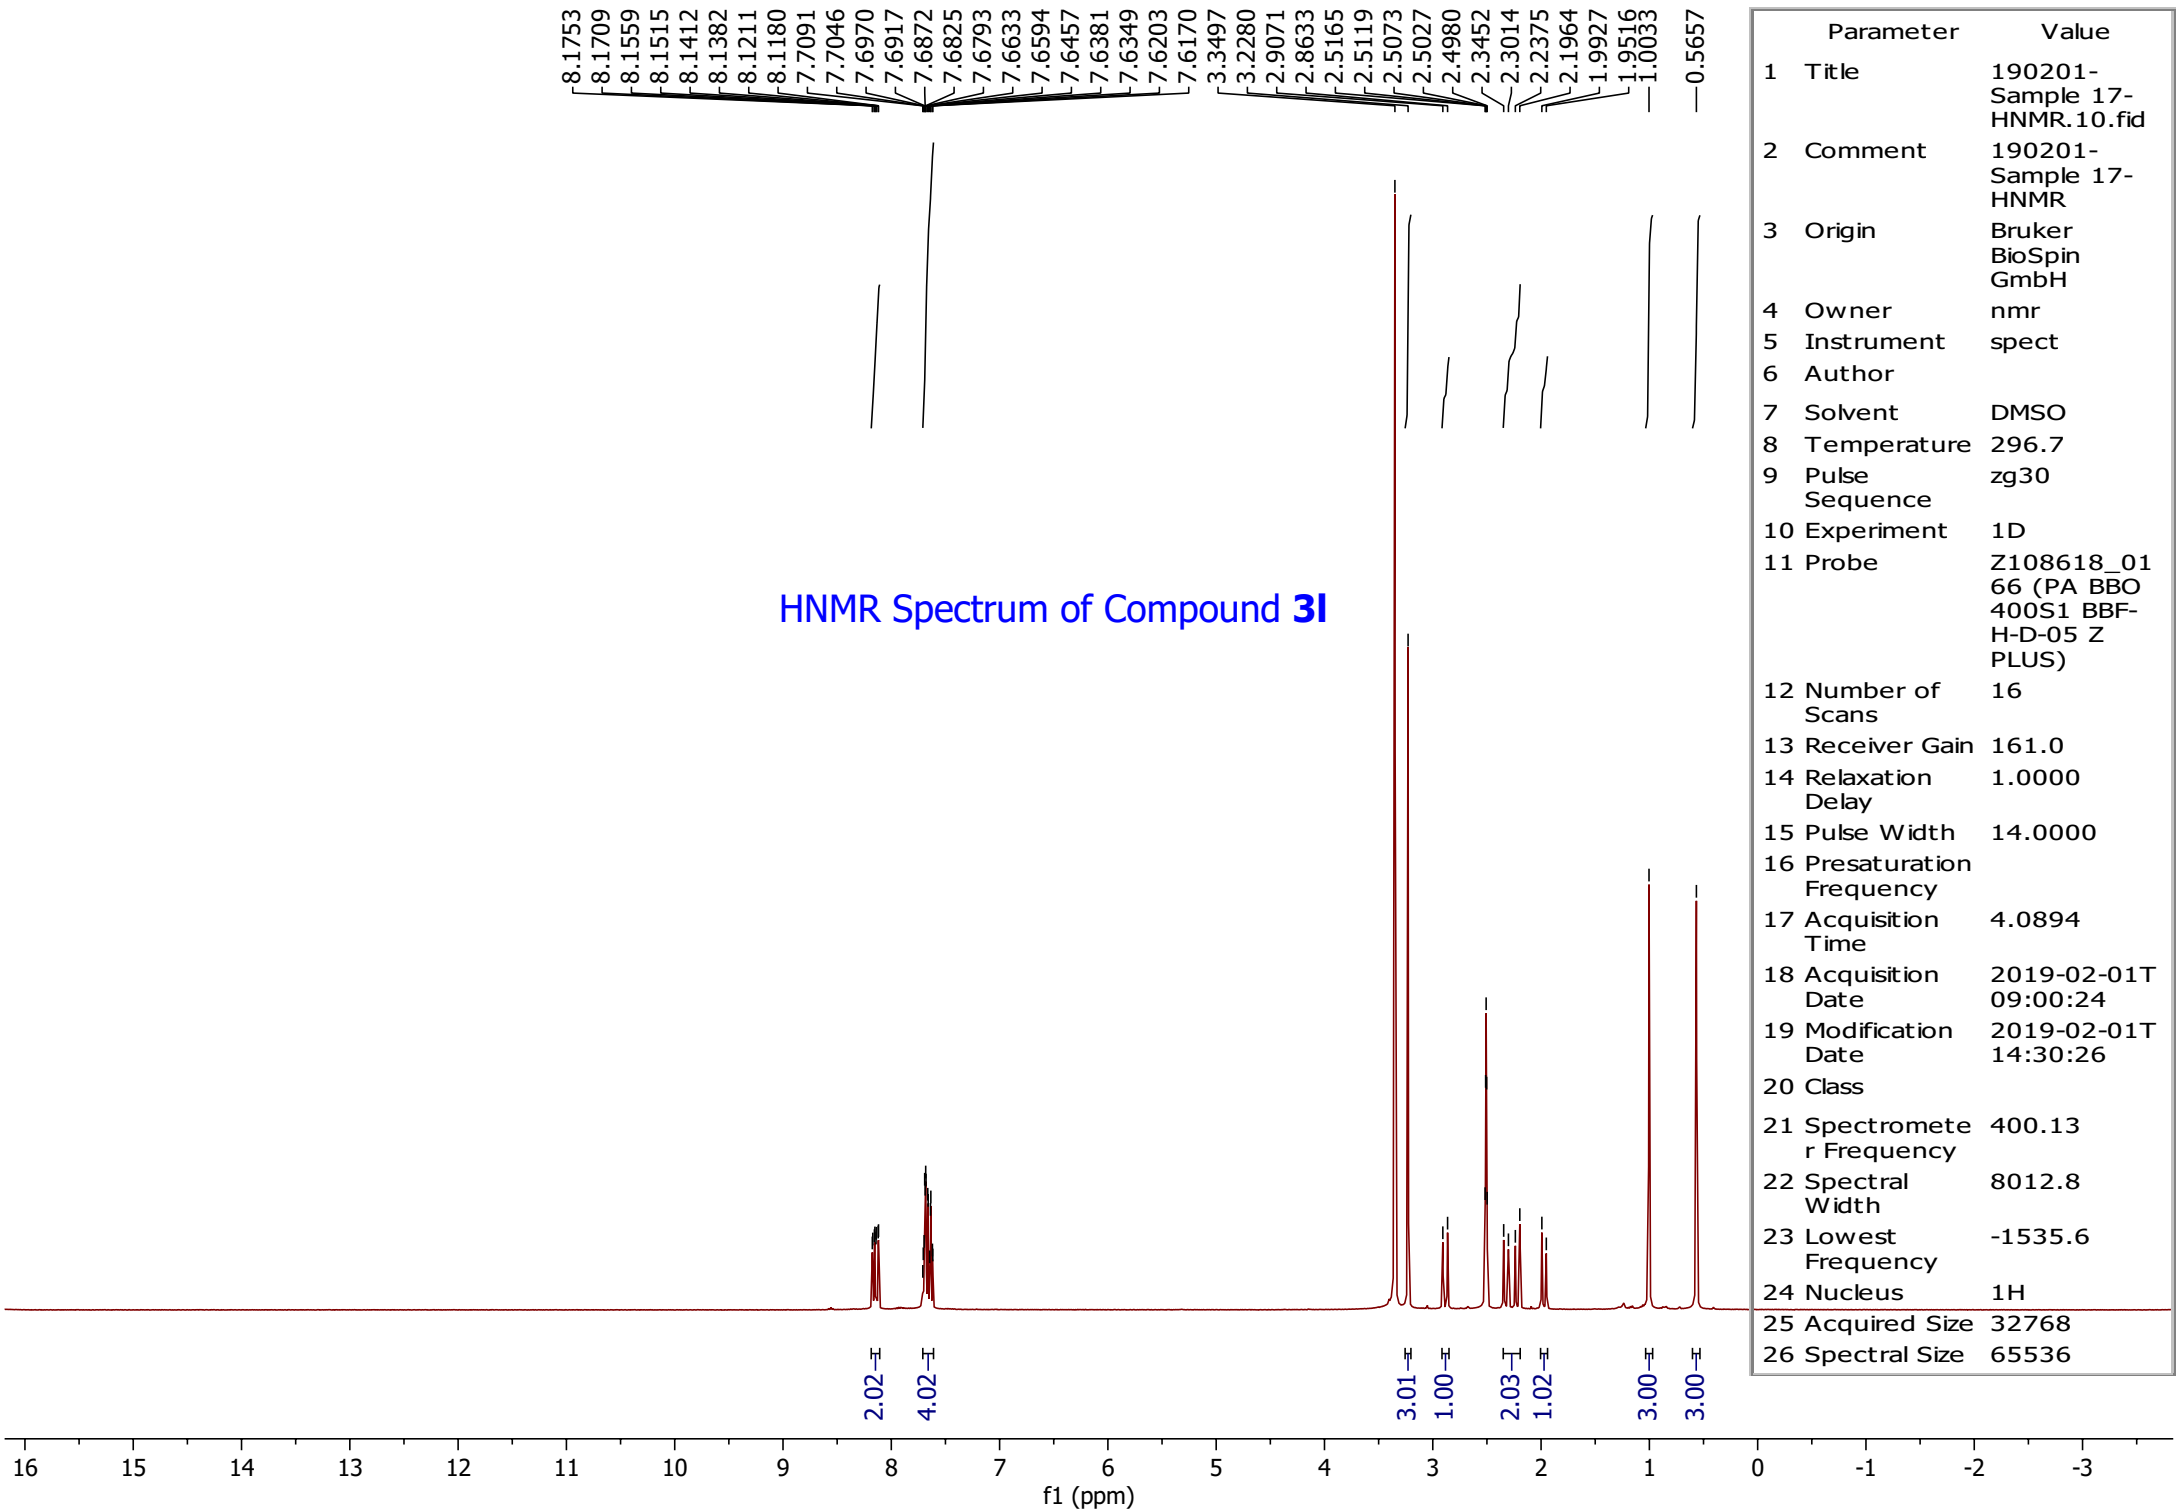

| Parameter                  | Value                                         |
|----------------------------|-----------------------------------------------|
| 1 Title                    | 190201-Sample 17-HNMR.10.fid                  |
| 2 Comment                  | 190201-Sample 17-HNMR                         |
| 3 Origin                   | Bruker BioSpin GmbH                           |
| 4 Owner                    | nmr                                           |
| 5 Instrument               | spect                                         |
| 6 Author                   |                                               |
| 7 Solvent                  | DMSO                                          |
| 8 Temperature              | 296.7                                         |
| 9 Pulse Sequence           | zg30                                          |
| 10 Experiment              | 1D                                            |
| 11 Probe                   | Z108618_0166 (PA BBO 400S1 BBF-H-D-05 Z PLUS) |
| 12 Number of Scans         | 16                                            |
| 13 Receiver Gain           | 161.0                                         |
| 14 Relaxation Delay        | 1.0000                                        |
| 15 Pulse Width             | 14.0000                                       |
| 16 Presaturation Frequency |                                               |
| 17 Acquisition Time        | 4.0894                                        |
| 18 Acquisition Date        | 2019-02-01T 09:00:24                          |
| 19 Modification Date       | 2019-02-01T 14:30:26                          |
| 20 Class                   |                                               |
| 21 Spectrometer Frequency  | 400.13                                        |
| 22 Spectral Width          | 8012.8                                        |
| 23 Lowest Frequency        | -1535.6                                       |
| 24 Nucleus                 | 1H                                            |
| 25 Acquired Size           | 32768                                         |
| 26 Spectral Size           | 65536                                         |

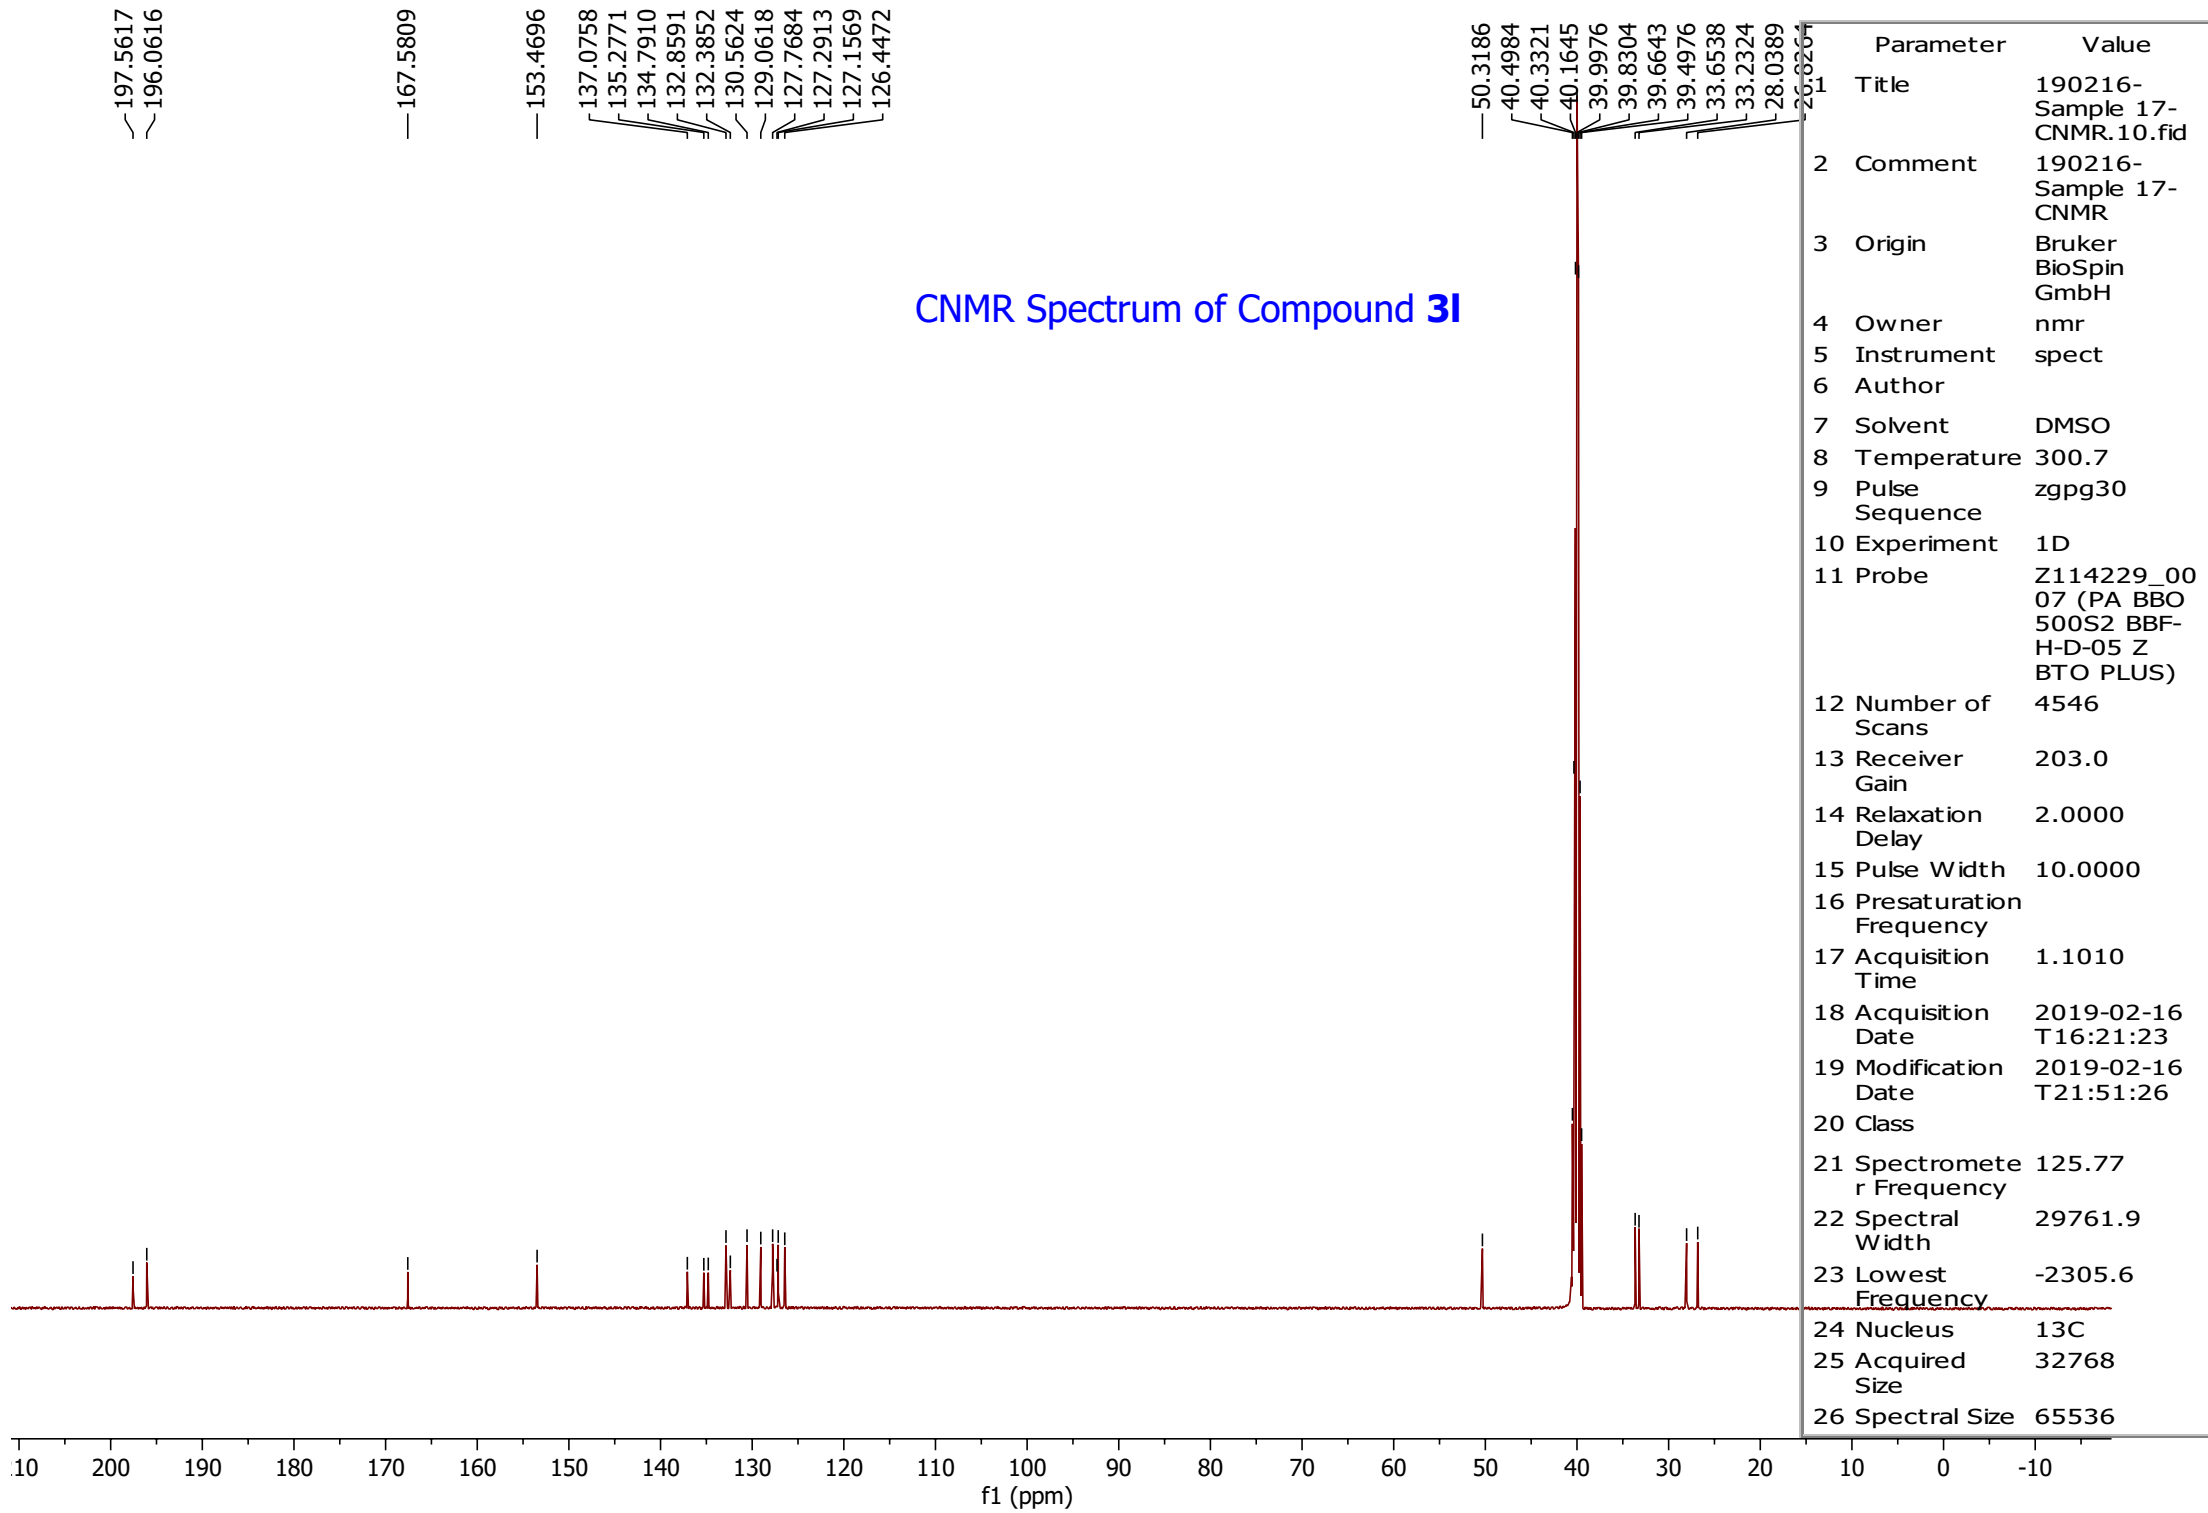

197.5617  
196.0616

167.5809

153.4696

137.0758  
135.2771  
134.7910  
132.8591  
132.3852  
130.5624  
129.0618  
127.7684  
127.2913  
127.1569  
126.4472

50.3186  
40.4984  
40.3321  
40.1645  
39.9976  
39.8304  
39.6643  
39.4976  
33.6538  
33.2324  
28.0389  
26.6204

f1 (ppm)

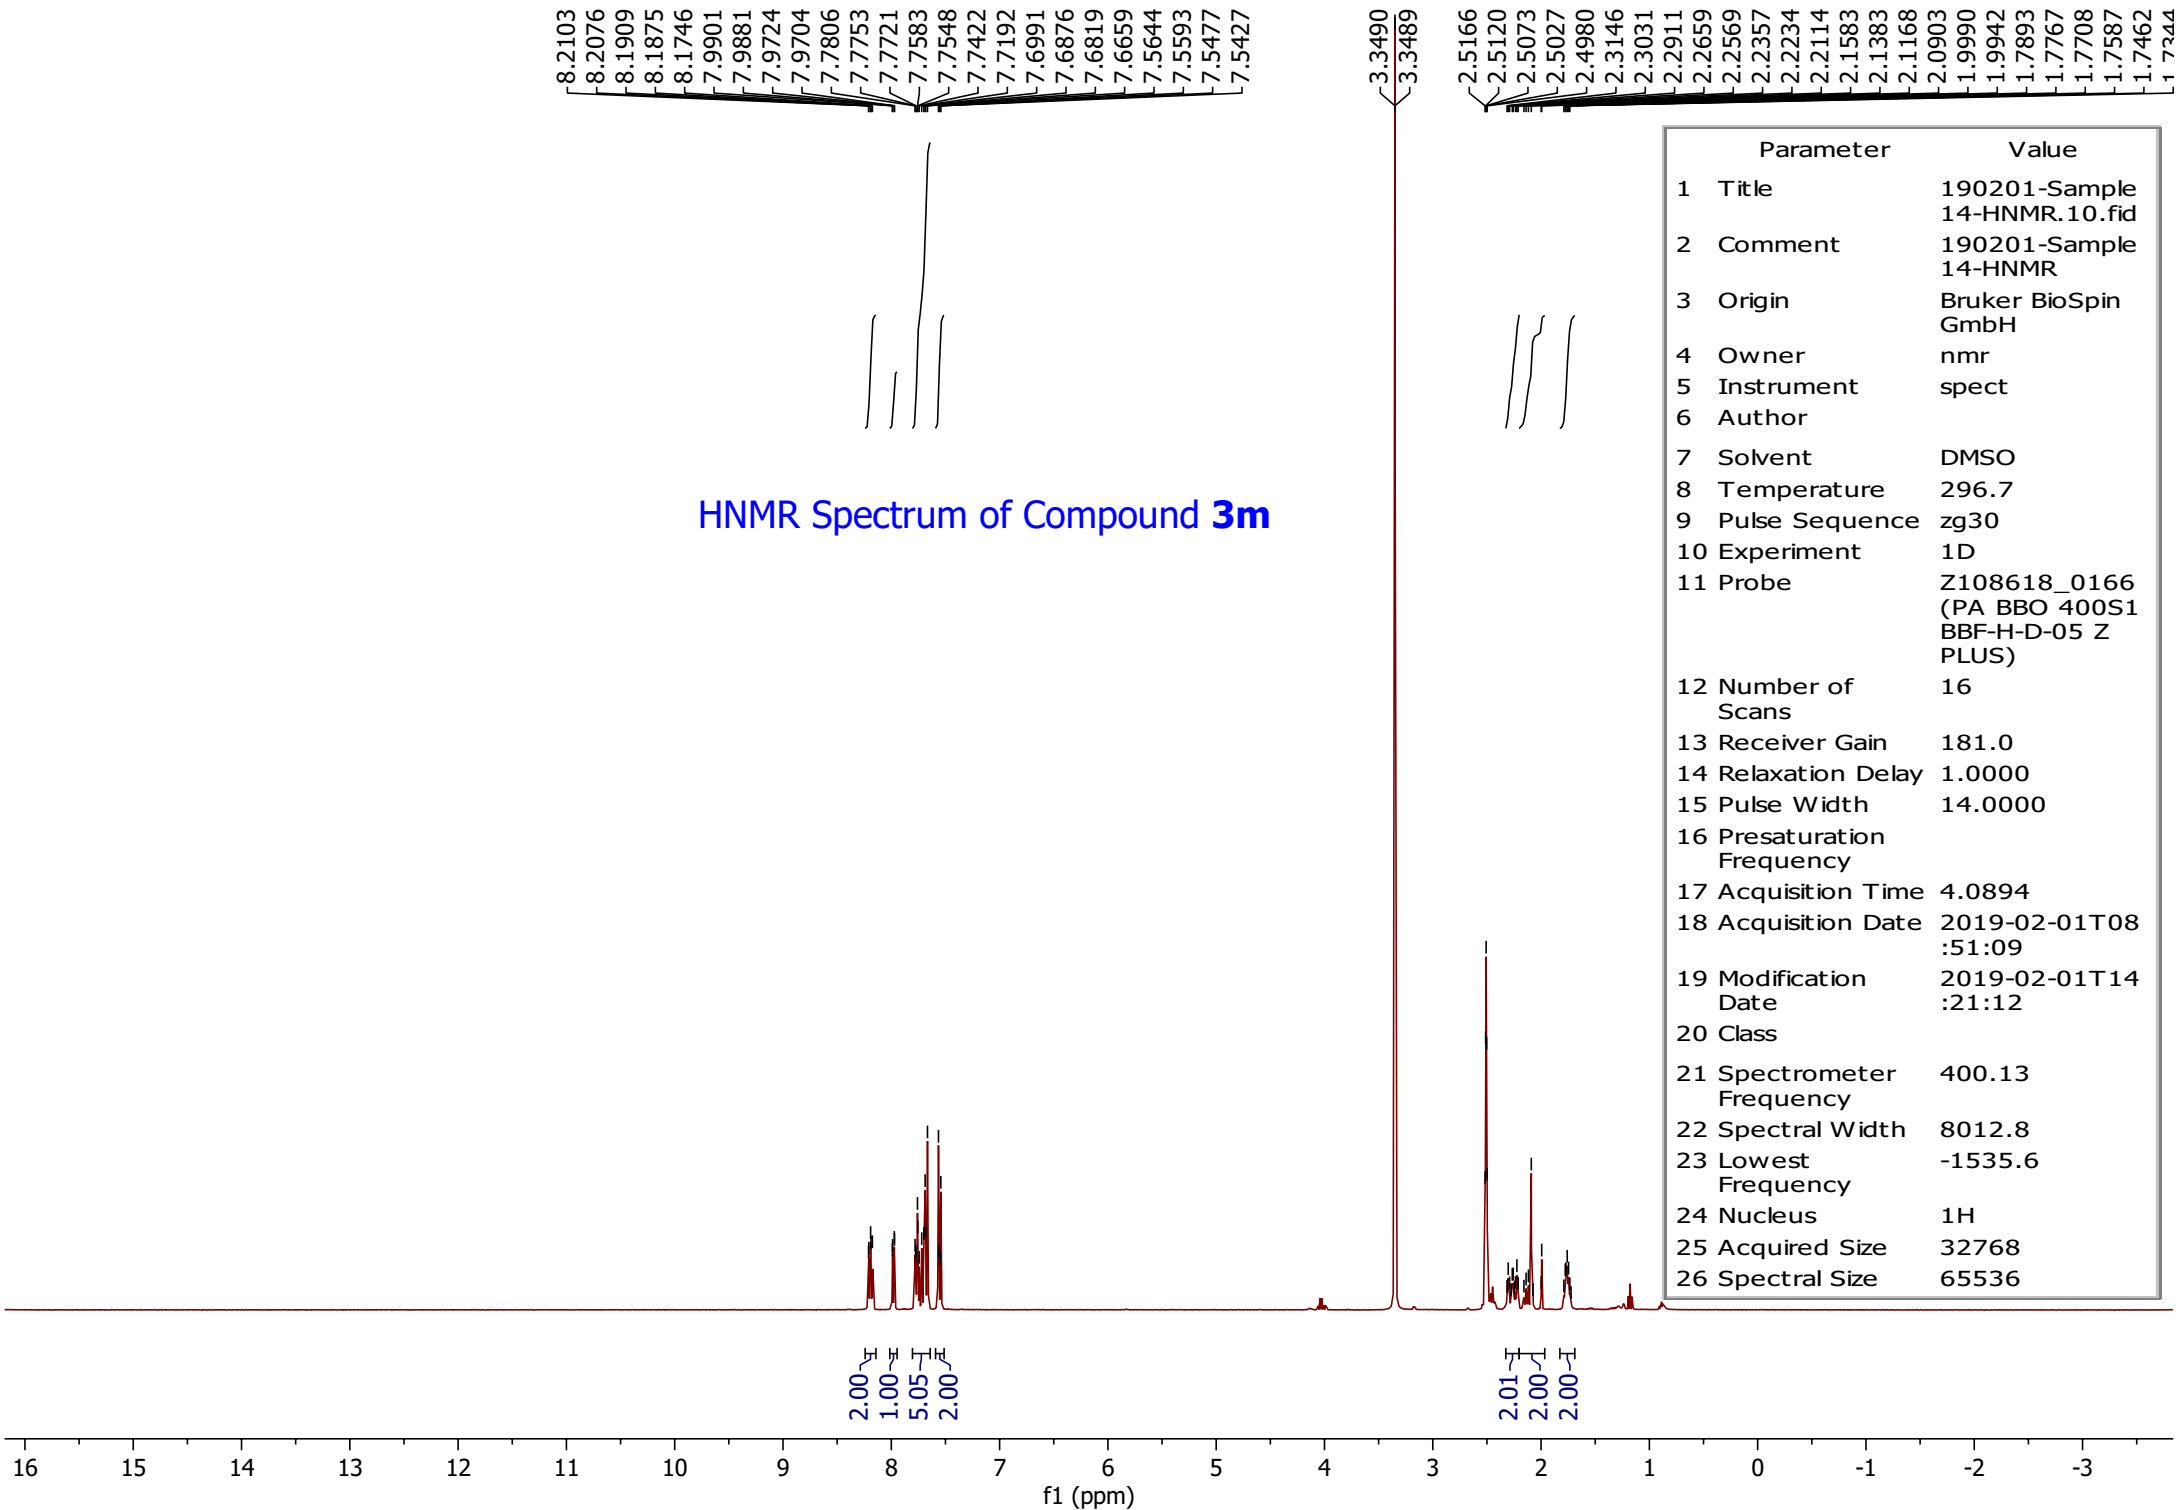

**HNMR Spectrum of Compound 3m**

| Parameter                  | Value                                         |
|----------------------------|-----------------------------------------------|
| 1 Title                    | 190201-Sample 14-HNMR.10.fid                  |
| 2 Comment                  | 190201-Sample 14-HNMR                         |
| 3 Origin                   | Bruker BioSpin GmbH                           |
| 4 Owner                    | nmr                                           |
| 5 Instrument               | spect                                         |
| 6 Author                   |                                               |
| 7 Solvent                  | DMSO                                          |
| 8 Temperature              | 296.7                                         |
| 9 Pulse Sequence           | zg30                                          |
| 10 Experiment              | 1D                                            |
| 11 Probe                   | Z108618_0166 (PA BBO 400S1 BBF-H-D-05 Z PLUS) |
| 12 Number of Scans         | 16                                            |
| 13 Receiver Gain           | 181.0                                         |
| 14 Relaxation Delay        | 1.0000                                        |
| 15 Pulse Width             | 14.0000                                       |
| 16 Presaturation Frequency |                                               |
| 17 Acquisition Time        | 4.0894                                        |
| 18 Acquisition Date        | 2019-02-01T08:51:09                           |
| 19 Modification Date       | 2019-02-01T14:21:12                           |
| 20 Class                   |                                               |
| 21 Spectrometer Frequency  | 400.13                                        |
| 22 Spectral Width          | 8012.8                                        |
| 23 Lowest Frequency        | -1535.6                                       |
| 24 Nucleus                 | 1H                                            |
| 25 Acquired Size           | 32768                                         |
| 26 Spectral Size           | 65536                                         |

8.2103  
8.2076  
8.1909  
8.1875  
8.1746  
7.9901  
7.9881  
7.9724  
7.9704  
7.7806  
7.7753  
7.7721  
7.7583  
7.7548  
7.7422  
7.7192  
7.6991  
7.6876  
7.6819  
7.6659  
7.5644  
7.5593  
7.5477  
7.5427

3.3490  
3.3489  
2.5166  
2.5120  
2.5073  
2.5027  
2.4980  
2.3146  
2.3031  
2.2911  
2.2659  
2.2569  
2.2357  
2.2234  
2.2114  
2.1583  
2.1383  
2.1168  
2.0903  
1.9990  
1.9942  
1.7893  
1.7767  
1.7708  
1.7587  
1.7462  
1.7344

2.00  
1.00  
5.05  
2.00

2.01  
2.00  
2.00

16 15 14 13 12 11 10 9 8 7 6 5 4 3 2 1 0 -1 -2 -3

f1 (ppm)



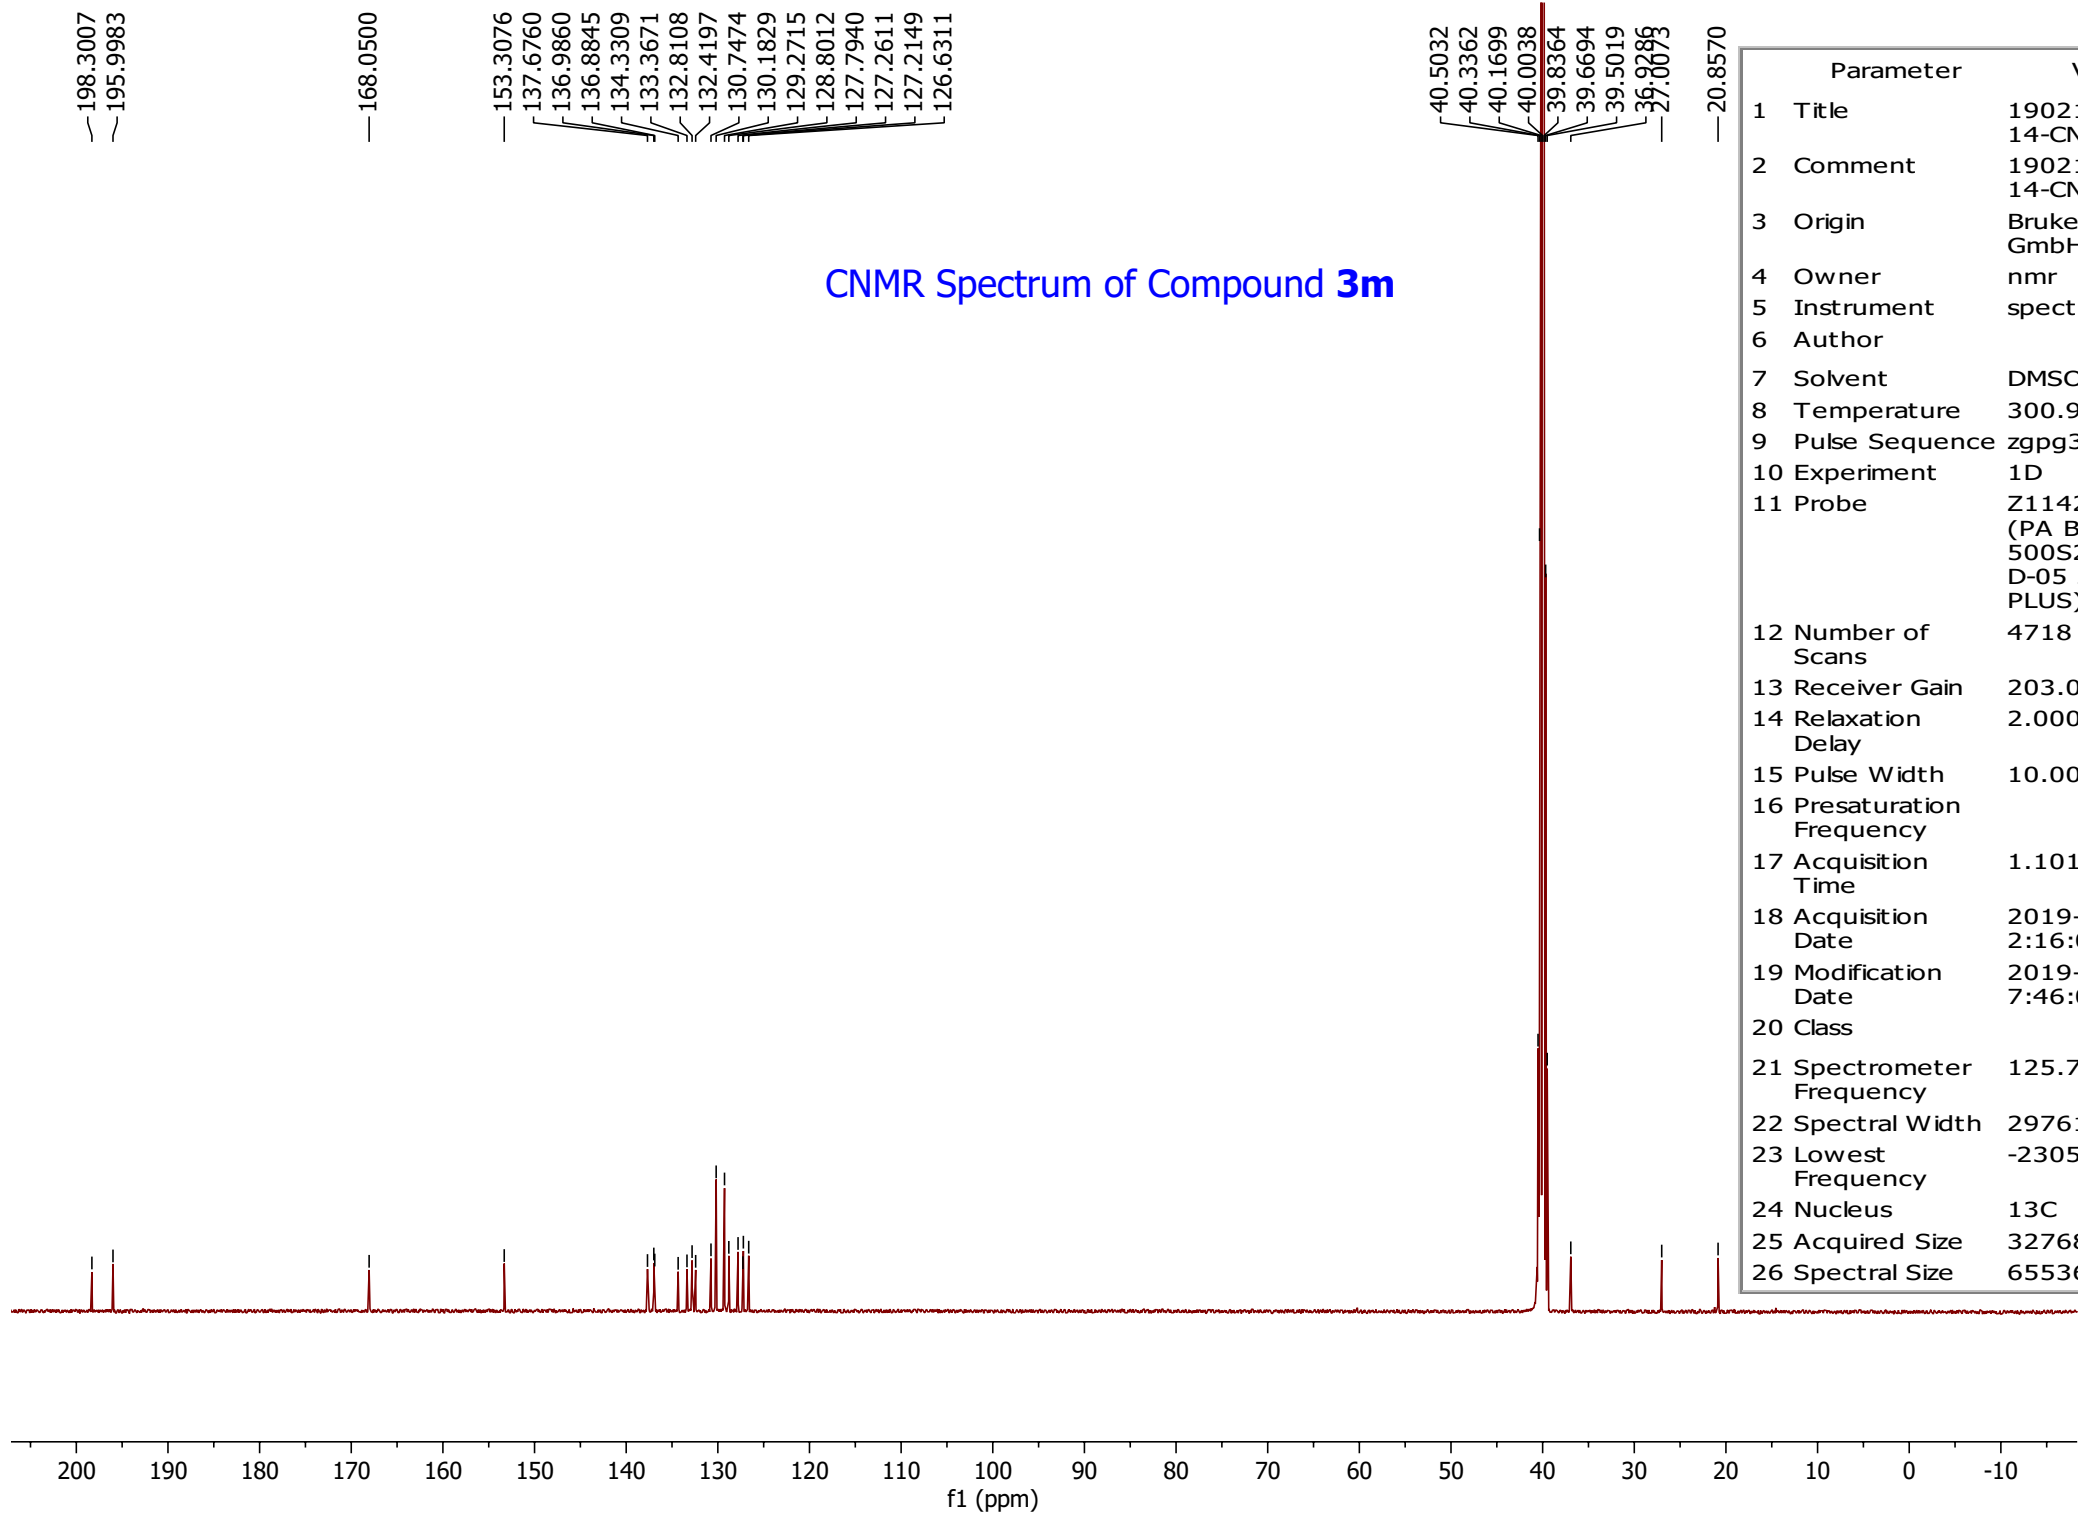

198.3007  
195.9983

168.0500

153.3076  
137.6760  
136.9860  
136.8845  
134.3309  
133.3671  
132.8108  
132.4197  
130.7474  
130.1829  
129.2715  
128.8012  
127.7940  
127.2611  
127.2149  
126.6311

40.5032  
40.3362  
40.1699  
40.0038  
39.8364  
39.6694  
39.5019  
36.9286  
27.0073

20.8570

f1 (ppm)

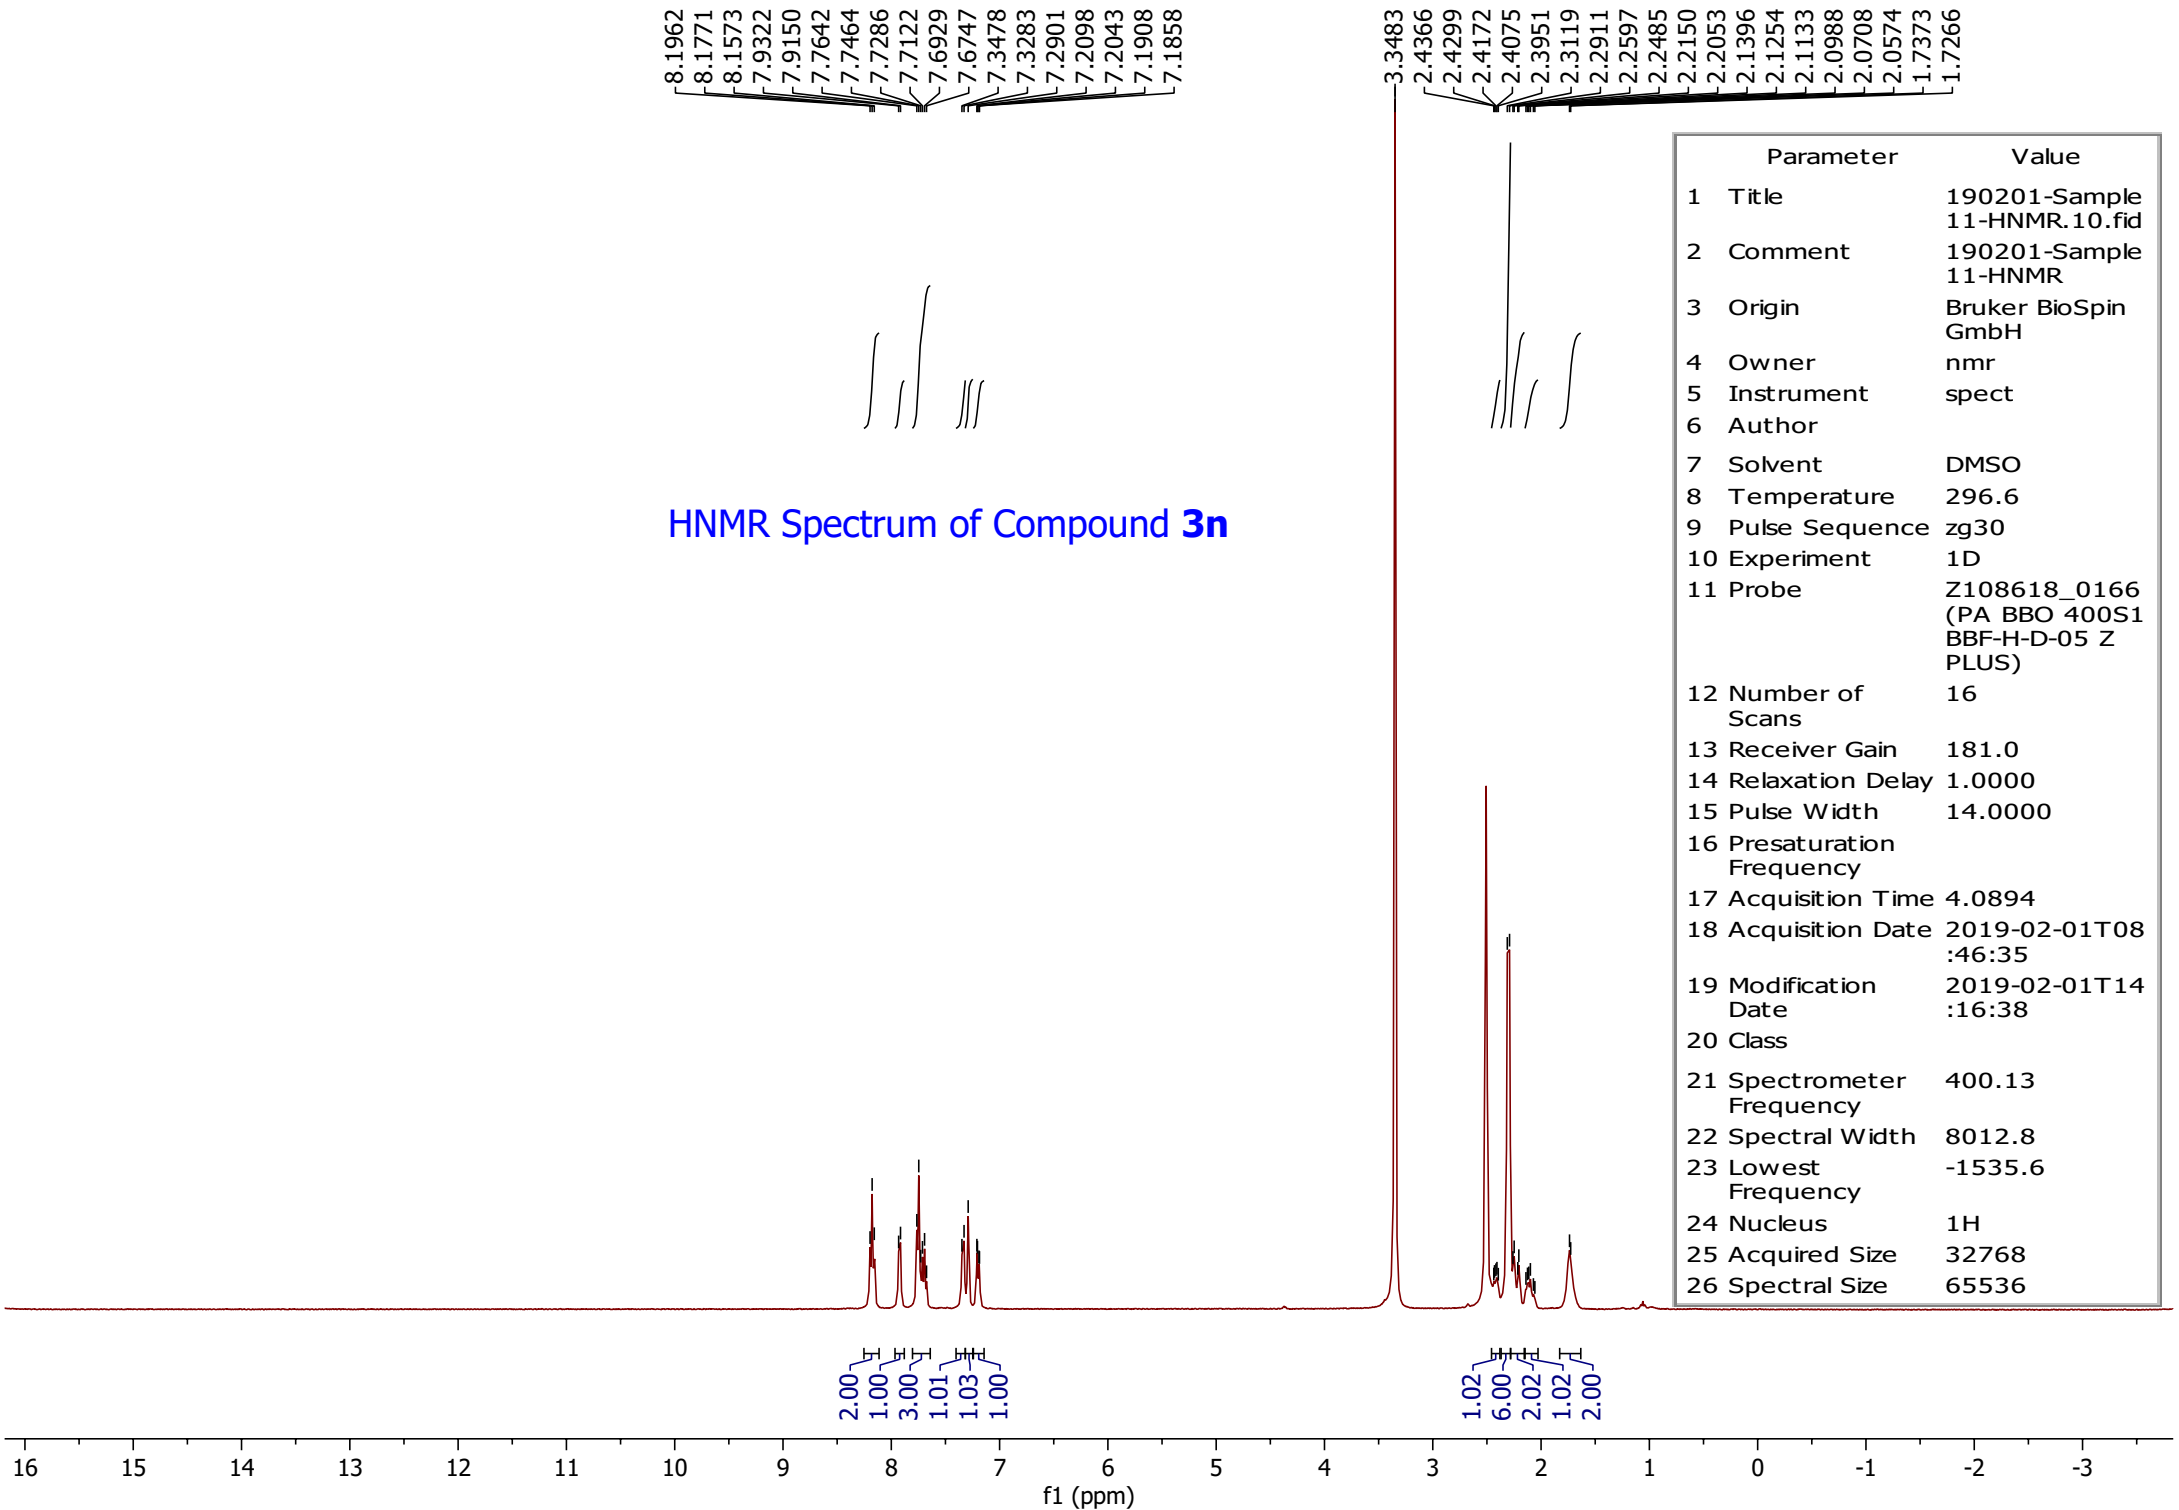

8.1962  
8.1771  
8.1573  
7.9322  
7.9150  
7.7642  
7.7464  
7.7286  
7.7122  
7.6929  
7.6747  
7.3478  
7.3283  
7.2901  
7.2098  
7.2043  
7.1908  
7.1858

3.3483  
2.4366  
2.4299  
2.4172  
2.4075  
2.3951  
2.3119  
2.2911  
2.2597  
2.2485  
2.2150  
2.2053  
2.1396  
2.1254  
2.1133  
2.0988  
2.0708  
2.0574  
1.7373  
1.7266

2.00  
1.00  
3.00  
1.01  
1.03  
1.00

1.02  
6.00  
2.02  
1.02  
2.00

16 15 14 13 12 11 10 9 8 7 6 5 4 3 2 1 0 -1 -2 -3

f1 (ppm)

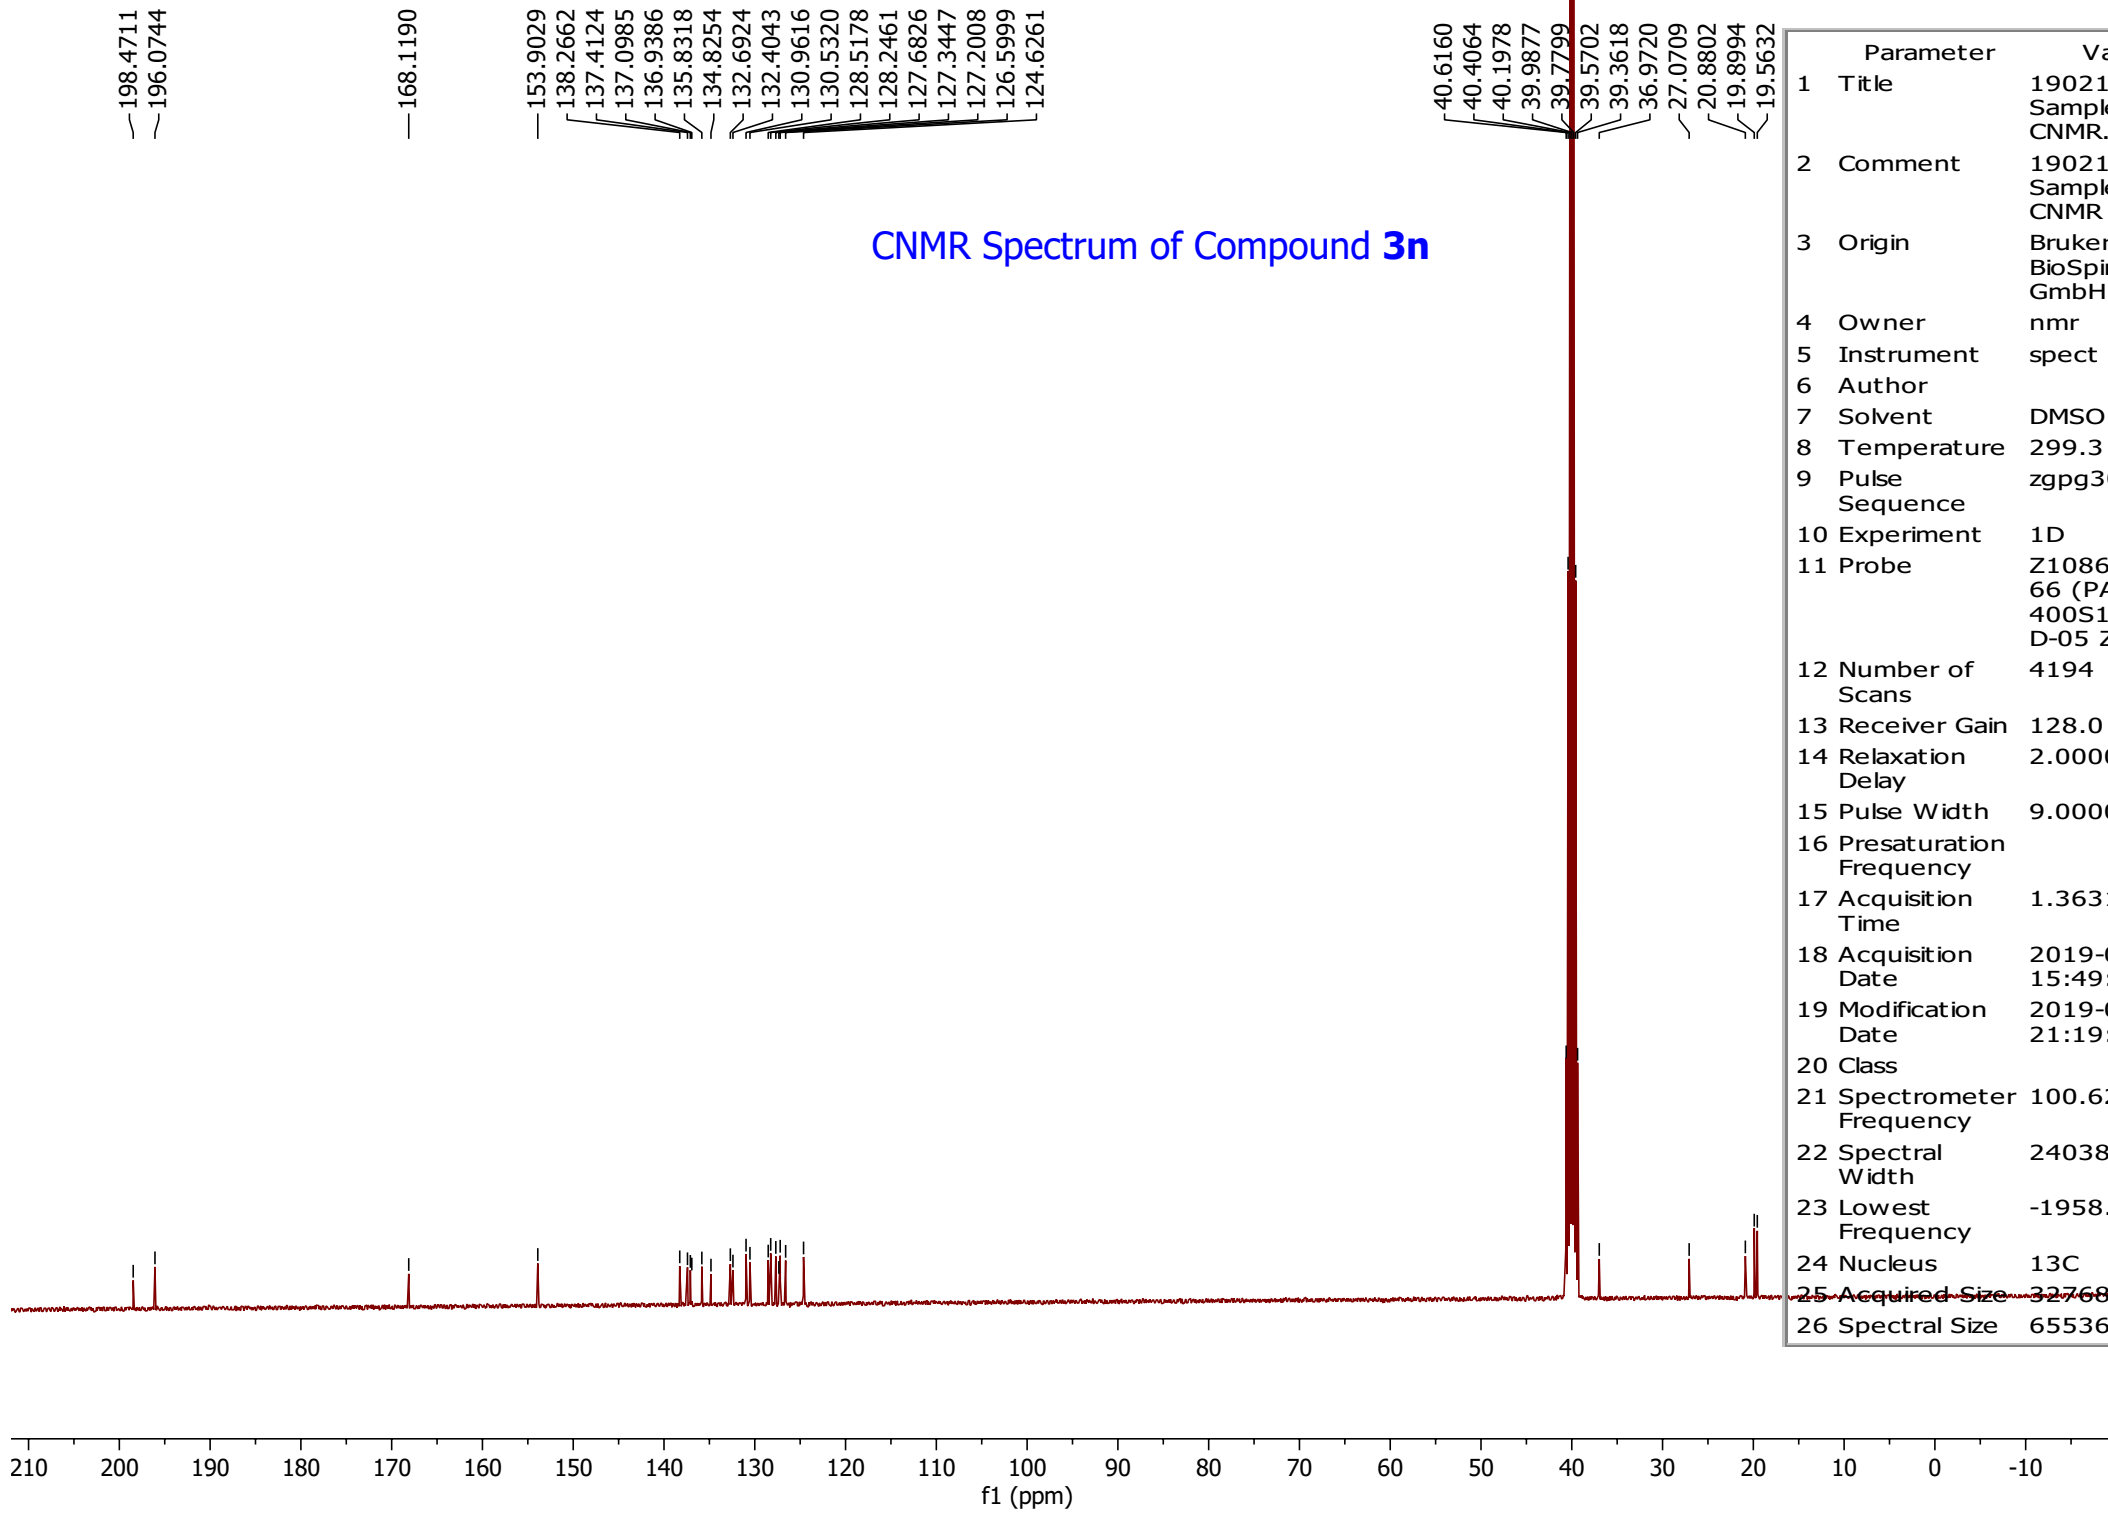

| Parameter                  | Value                                         |
|----------------------------|-----------------------------------------------|
| 1 Title                    | 190215-Sample 11-CNMR.10.fid                  |
| 2 Comment                  | 190215-Sample 11-CNMR                         |
| 3 Origin                   | Bruker BioSpin GmbH                           |
| 4 Owner                    | nmr                                           |
| 5 Instrument               | spect                                         |
| 6 Author                   |                                               |
| 7 Solvent                  | DMSO                                          |
| 8 Temperature              | 299.3                                         |
| 9 Pulse Sequence           | zgpg30                                        |
| 10 Experiment              | 1D                                            |
| 11 Probe                   | Z108618_0166 (PA BBO 400S1 BBF-H-D-05 Z PLUS) |
| 12 Number of Scans         | 4194                                          |
| 13 Receiver Gain           | 128.0                                         |
| 14 Relaxation Delay        | 2.0000                                        |
| 15 Pulse Width             | 9.0000                                        |
| 16 Presaturation Frequency |                                               |
| 17 Acquisition Time        | 1.3631                                        |
| 18 Acquisition Date        | 2019-02-15T15:49:17                           |
| 19 Modification Date       | 2019-02-15T21:19:20                           |
| 20 Class                   |                                               |
| 21 Spectrometer Frequency  | 100.62                                        |
| 22 Spectral Width          | 24038.5                                       |
| 23 Lowest Frequency        | -1958.4                                       |
| 24 Nucleus                 | 13C                                           |
| 25 Acquired Size           | 32768                                         |
| 26 Spectral Size           | 65536                                         |

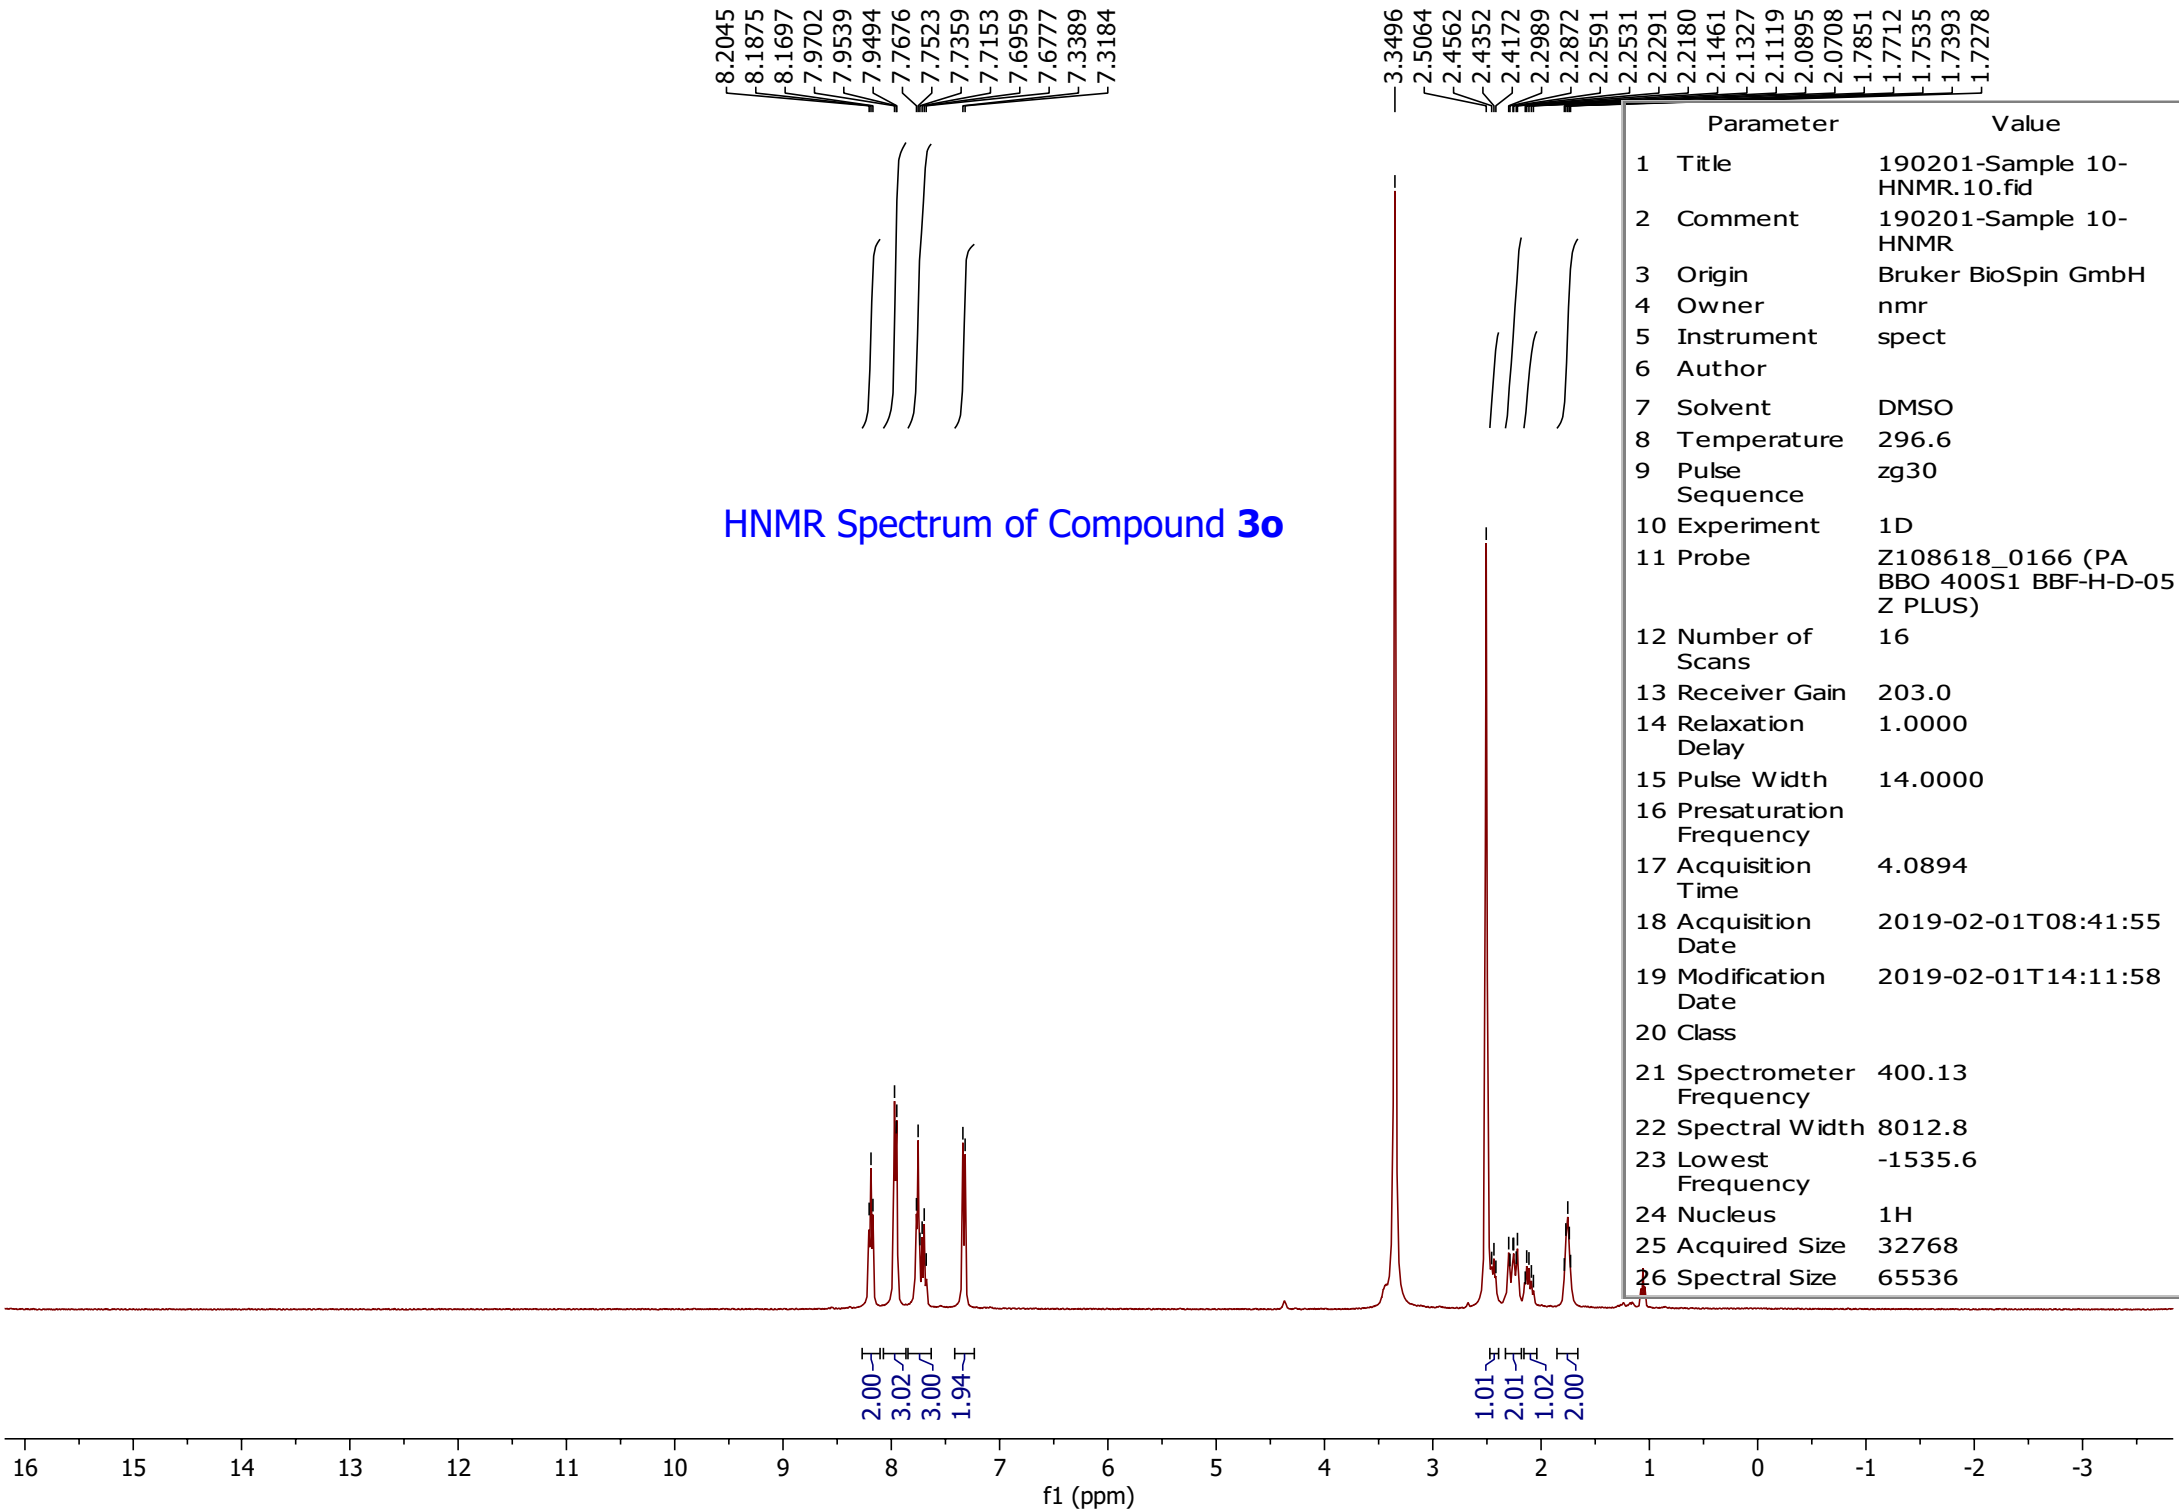

| Parameter                  | Value                                         |
|----------------------------|-----------------------------------------------|
| 1 Title                    | 190201-Sample 10-HNMR.10.fid                  |
| 2 Comment                  | 190201-Sample 10-HNMR                         |
| 3 Origin                   | Bruker BioSpin GmbH                           |
| 4 Owner                    | nmr                                           |
| 5 Instrument               | spect                                         |
| 6 Author                   |                                               |
| 7 Solvent                  | DMSO                                          |
| 8 Temperature              | 296.6                                         |
| 9 Pulse Sequence           | zg30                                          |
| 10 Experiment              | 1D                                            |
| 11 Probe                   | Z108618_0166 (PA BBO 400S1 BBF-H-D-05 Z PLUS) |
| 12 Number of Scans         | 16                                            |
| 13 Receiver Gain           | 203.0                                         |
| 14 Relaxation Delay        | 1.0000                                        |
| 15 Pulse Width             | 14.0000                                       |
| 16 Presaturation Frequency |                                               |
| 17 Acquisition Time        | 4.0894                                        |
| 18 Acquisition Date        | 2019-02-01T08:41:55                           |
| 19 Modification Date       | 2019-02-01T14:11:58                           |
| 20 Class                   |                                               |
| 21 Spectrometer Frequency  | 400.13                                        |
| 22 Spectral Width          | 8012.8                                        |
| 23 Lowest Frequency        | -1535.6                                       |
| 24 Nucleus                 | 1H                                            |
| 25 Acquired Size           | 32768                                         |
| 26 Spectral Size           | 65536                                         |

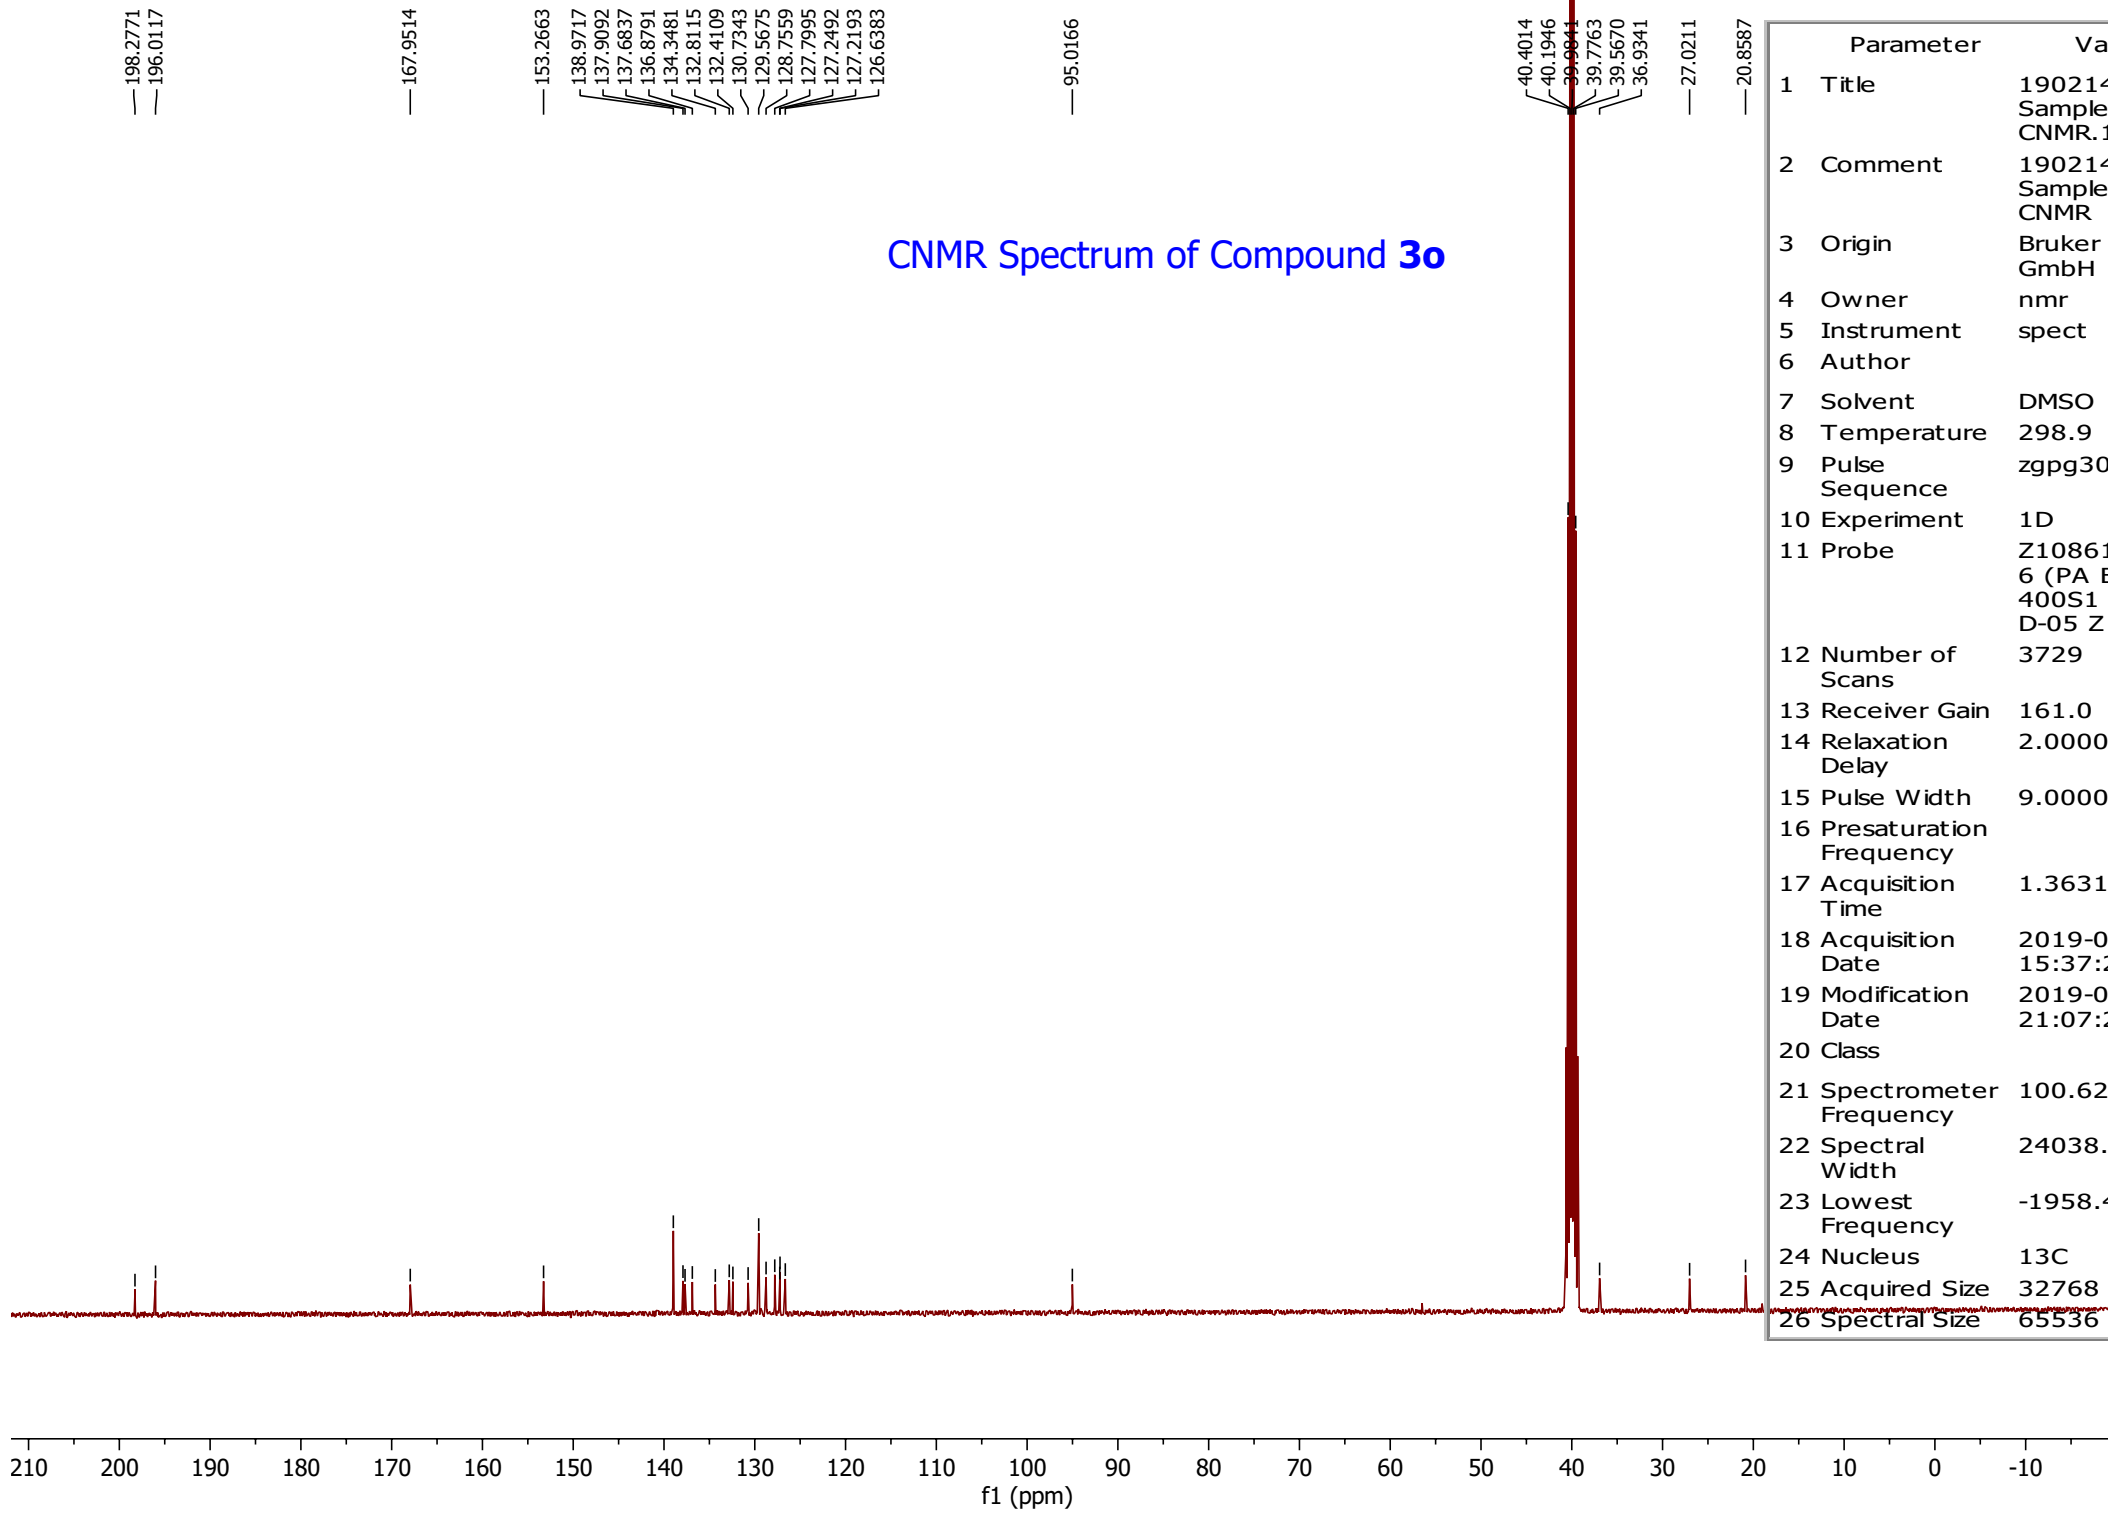

— 198.2771  
— 196.0117

— 167.9514

— 153.2663

138.9717  
137.9092  
137.6837  
136.8791  
134.3481  
132.8115  
132.4109  
130.7343  
129.5675  
128.7559  
127.7995  
127.2492  
127.2193  
126.6383

— 95.0166

40.4014  
40.1946  
39.9641  
39.7763  
39.5670  
36.9341

— 27.0211

— 20.8587

| Parameter                  | Value                                         |
|----------------------------|-----------------------------------------------|
| 1 Title                    | 190214-Sample 10-CNMR.10.fid                  |
| 2 Comment                  | 190214-Sample 10-CNMR                         |
| 3 Origin                   | Bruker BioSpin GmbH                           |
| 4 Owner                    | nmr                                           |
| 5 Instrument               | spect                                         |
| 6 Author                   |                                               |
| 7 Solvent                  | DMSO                                          |
| 8 Temperature              | 298.9                                         |
| 9 Pulse Sequence           | zgpg30                                        |
| 10 Experiment              | 1D                                            |
| 11 Probe                   | Z108618_0166 (PA BBO 400S1 BBF-H-D-05 Z PLUS) |
| 12 Number of Scans         | 3729                                          |
| 13 Receiver Gain           | 161.0                                         |
| 14 Relaxation Delay        | 2.0000                                        |
| 15 Pulse Width             | 9.0000                                        |
| 16 Presaturation Frequency |                                               |
| 17 Acquisition Time        | 1.3631                                        |
| 18 Acquisition Date        | 2019-02-14T 15:37:26                          |
| 19 Modification Date       | 2019-02-14T 21:07:28                          |
| 20 Class                   |                                               |
| 21 Spectrometer Frequency  | 100.62                                        |
| 22 Spectral Width          | 24038.5                                       |
| 23 Lowest Frequency        | -1958.4                                       |
| 24 Nucleus                 | <sup>13</sup> C                               |
| 25 Acquired Size           | 32768                                         |
| 26 Spectral Size           | 65536                                         |

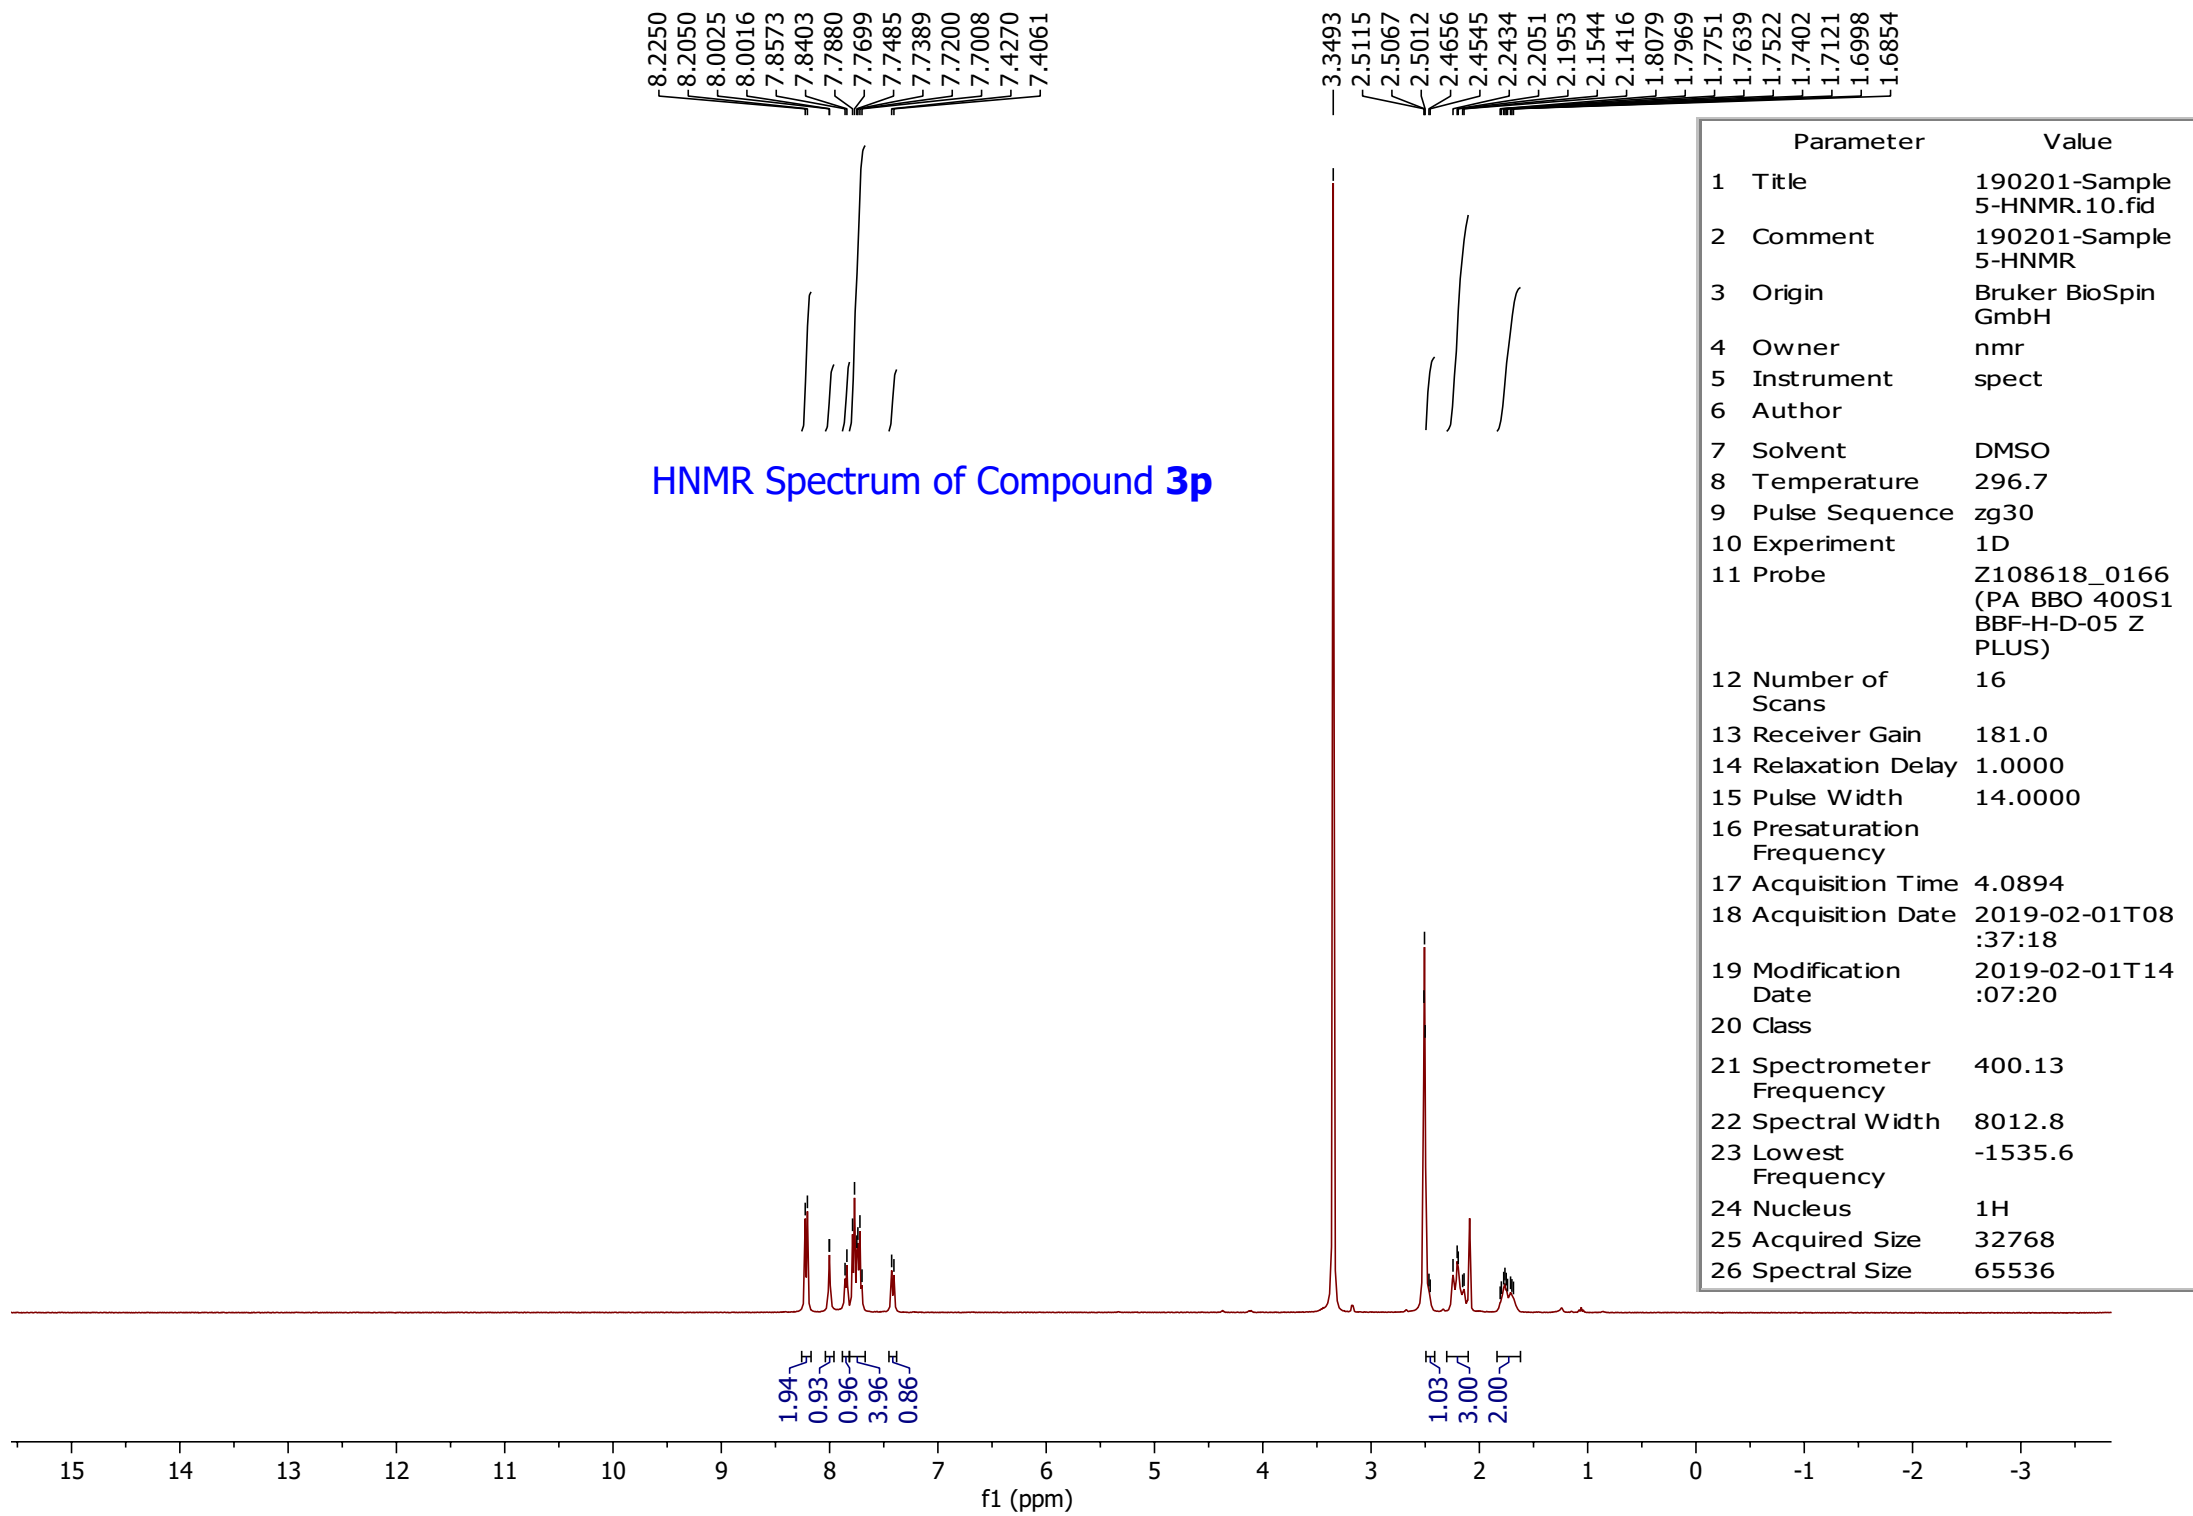

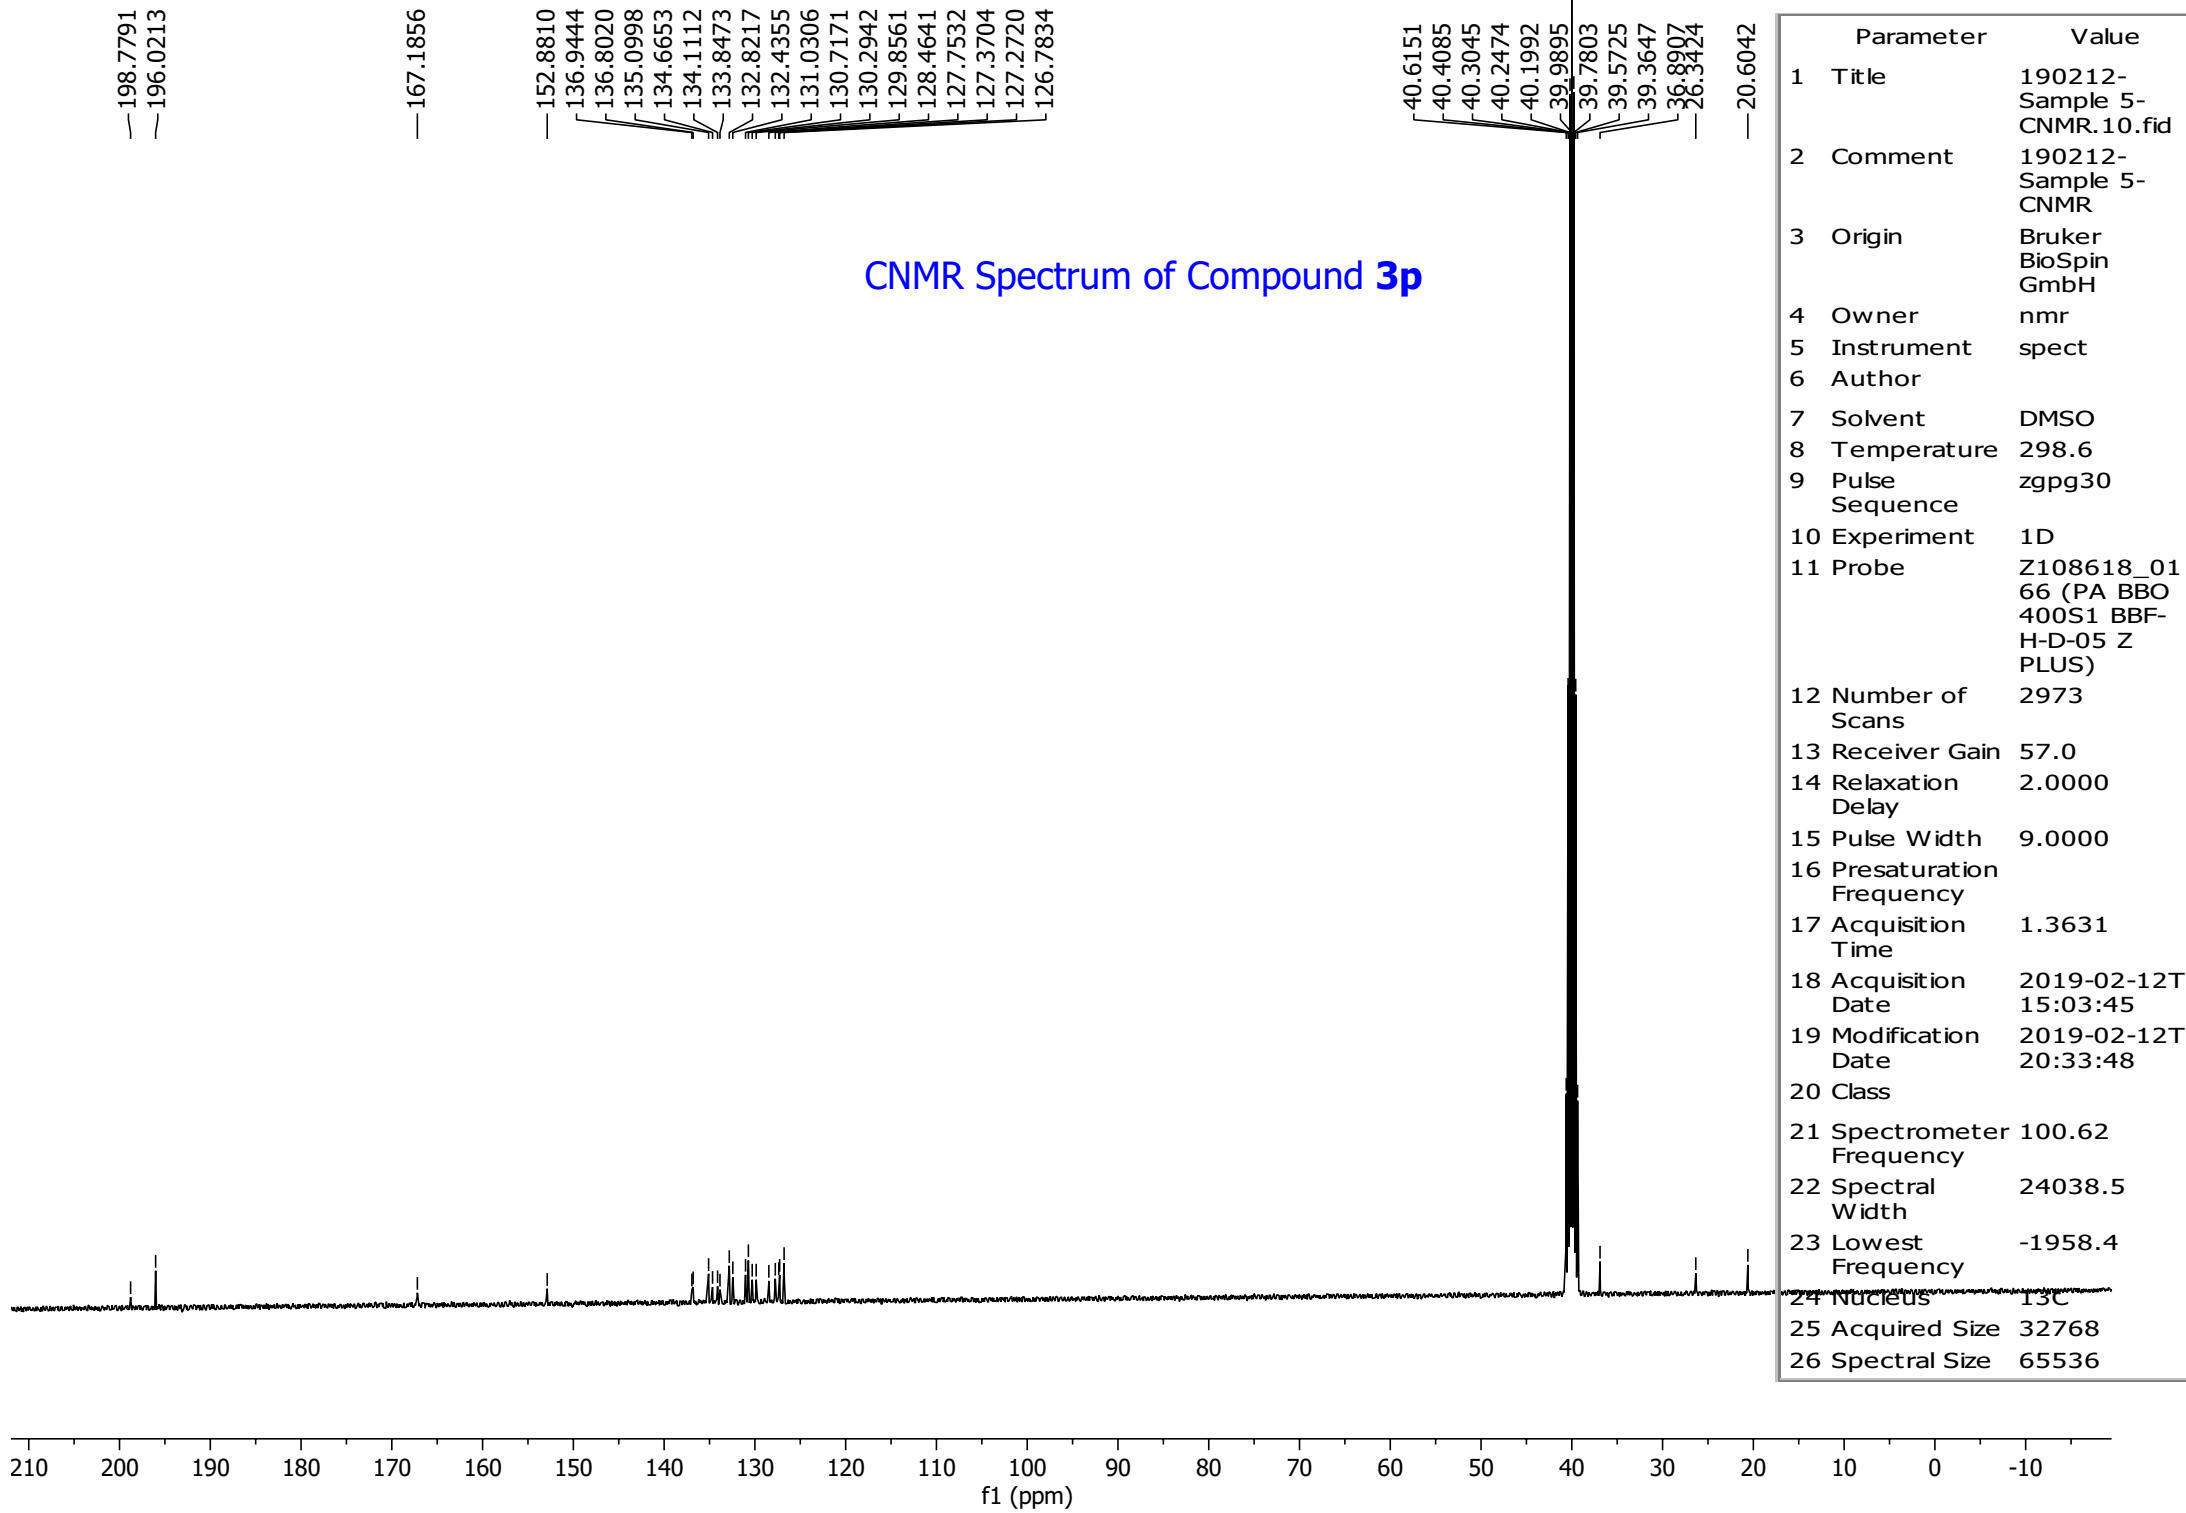

—198.7791  
—196.0213

—167.1856

—152.8810  
—136.9444  
—136.8020  
—135.0998  
—134.6653  
—134.1112  
—133.8473  
—132.8217  
—132.4355  
—131.0306  
—130.7171  
—130.2942  
—129.8561  
—128.4641  
—127.7532  
—127.3704  
—127.2720  
—126.7834

—40.6151  
—40.4085  
—40.3045  
—40.2474  
—40.1992  
—39.9895  
—39.7803  
—39.5725  
—39.3647  
—36.8907  
—26.3424  
—20.6042

f1 (ppm)

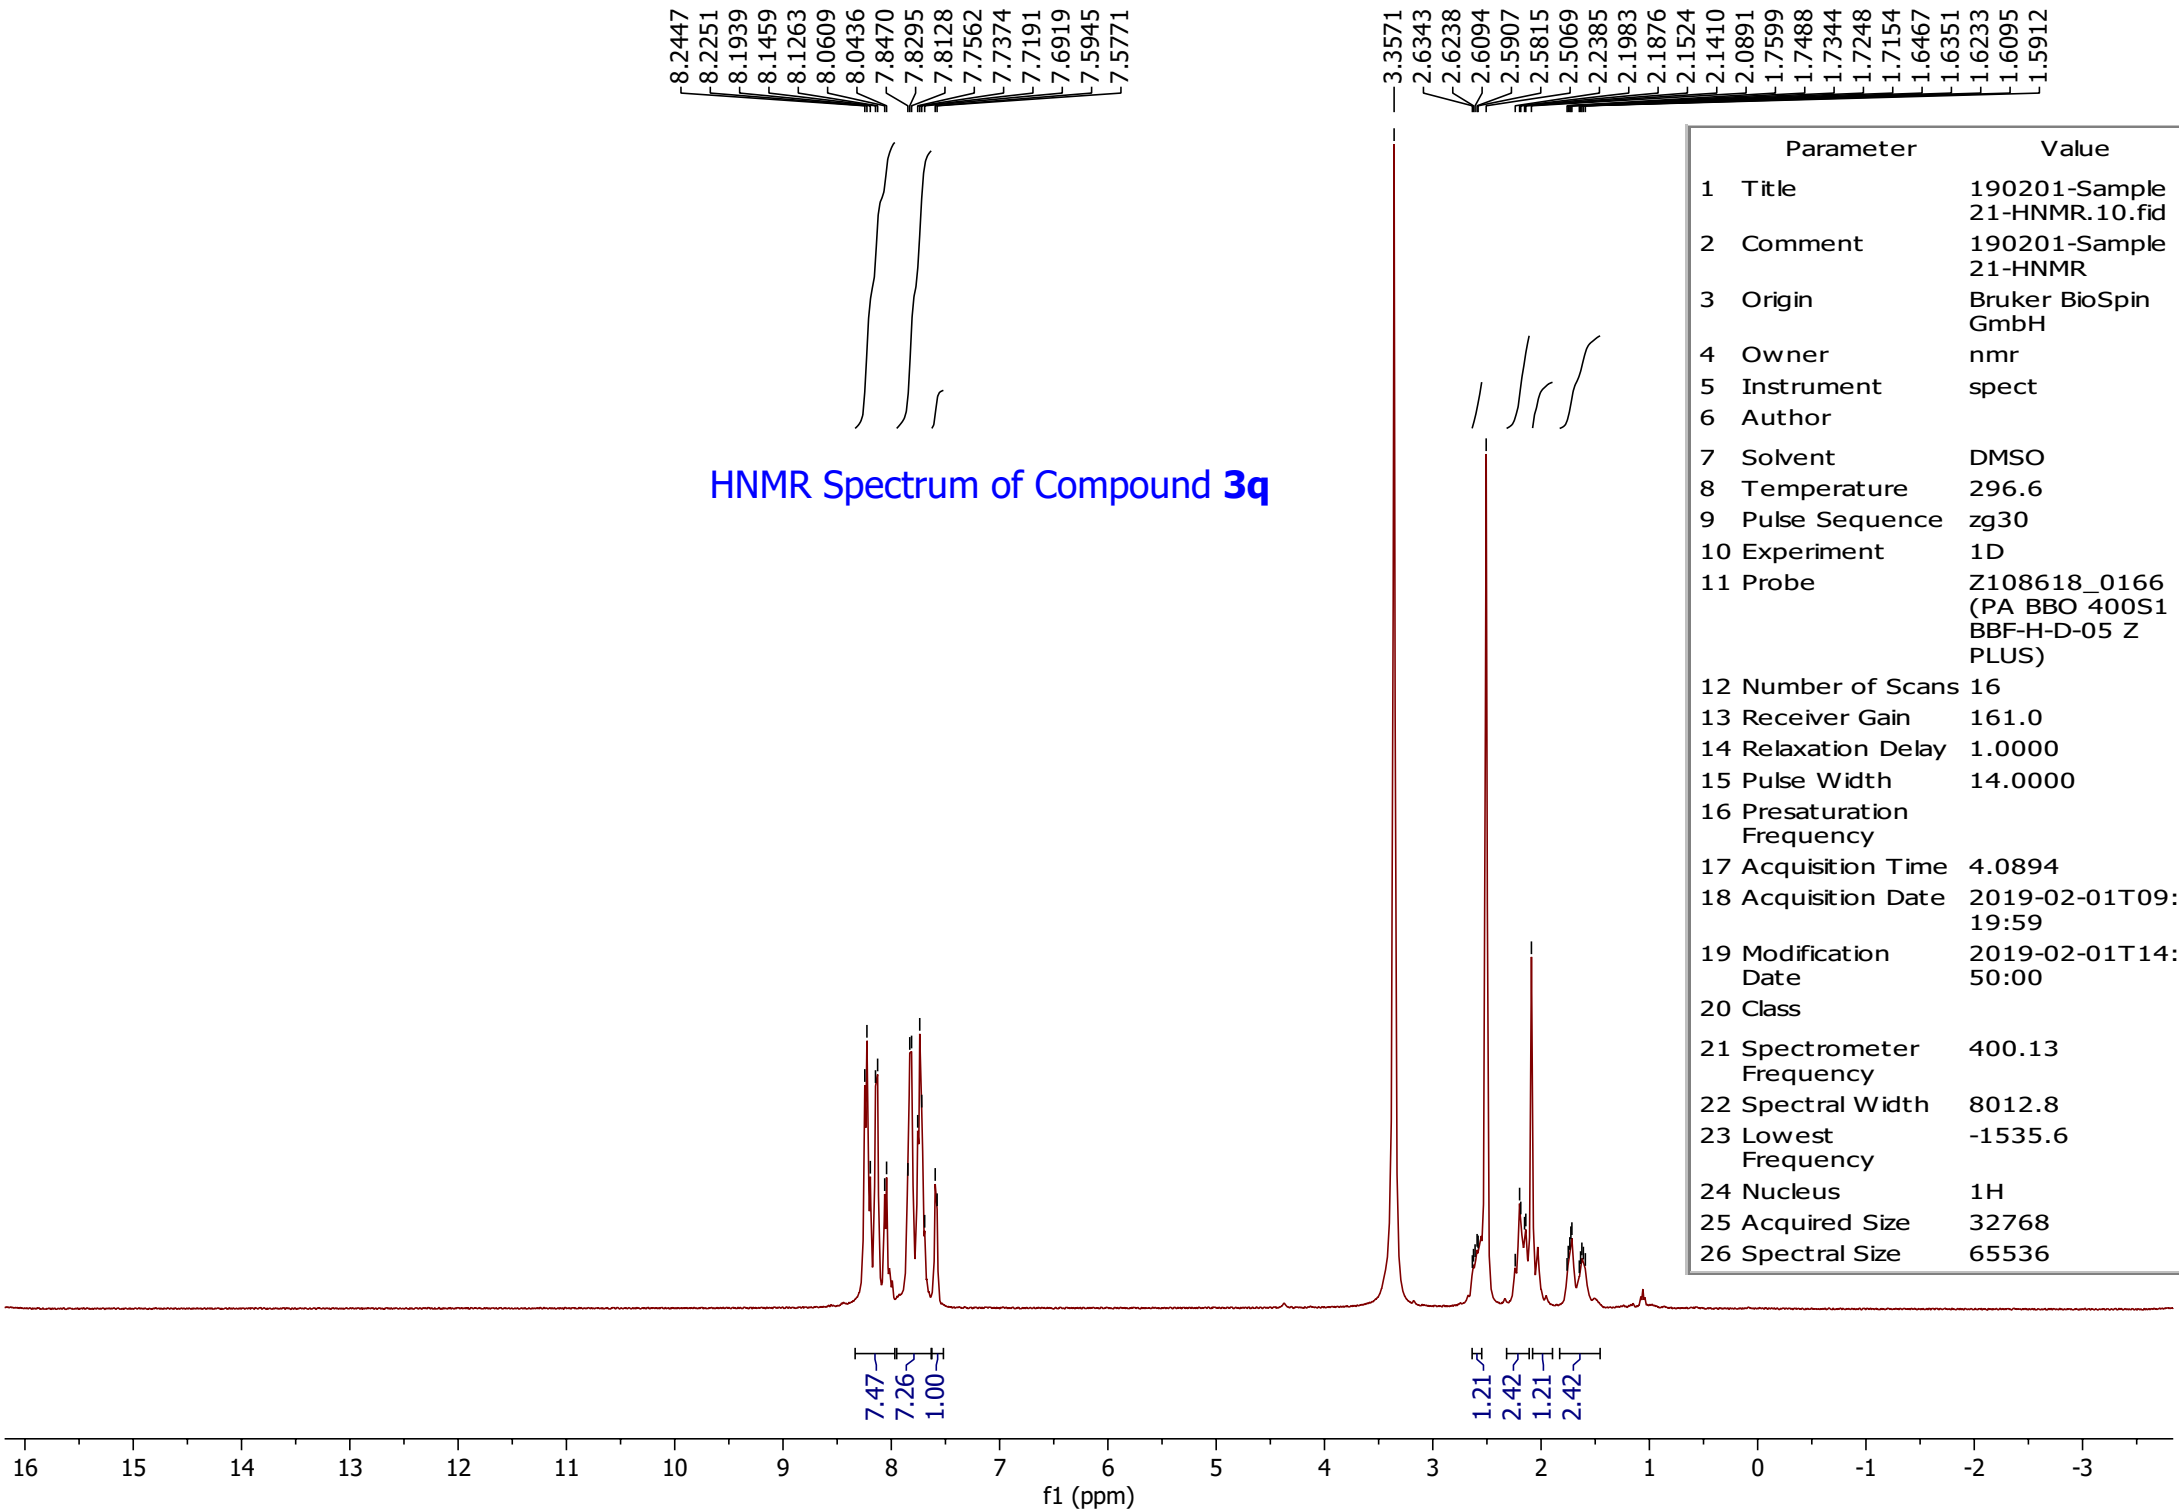

HNMR Spectrum of Compound **3q**

| Parameter                  | Value                                         |
|----------------------------|-----------------------------------------------|
| 1 Title                    | 190201-Sample 21-HNMR.10.fid                  |
| 2 Comment                  | 190201-Sample 21-HNMR                         |
| 3 Origin                   | Bruker BioSpin GmbH                           |
| 4 Owner                    | nmr                                           |
| 5 Instrument               | spect                                         |
| 6 Author                   |                                               |
| 7 Solvent                  | DMSO                                          |
| 8 Temperature              | 296.6                                         |
| 9 Pulse Sequence           | zg30                                          |
| 10 Experiment              | 1D                                            |
| 11 Probe                   | Z108618_0166 (PA BBO 400S1 BBF-H-D-05 Z PLUS) |
| 12 Number of Scans         | 16                                            |
| 13 Receiver Gain           | 161.0                                         |
| 14 Relaxation Delay        | 1.0000                                        |
| 15 Pulse Width             | 14.0000                                       |
| 16 Presaturation Frequency |                                               |
| 17 Acquisition Time        | 4.0894                                        |
| 18 Acquisition Date        | 2019-02-01T09:19:59                           |
| 19 Modification Date       | 2019-02-01T14:50:00                           |
| 20 Class                   |                                               |
| 21 Spectrometer Frequency  | 400.13                                        |
| 22 Spectral Width          | 8012.8                                        |
| 23 Lowest Frequency        | -1535.6                                       |
| 24 Nucleus                 | 1H                                            |
| 25 Acquired Size           | 32768                                         |
| 26 Spectral Size           | 65536                                         |

8.2447  
8.2251  
8.1939  
8.1459  
8.1263  
8.0609  
8.0436  
7.8470  
7.8295  
7.8128  
7.7562  
7.7374  
7.7191  
7.6919  
7.5945  
7.5771

3.3571  
2.6343  
2.6238  
2.6094  
2.5907  
2.5815  
2.5069  
2.2385  
2.1983  
2.1876  
2.1524  
2.1410  
2.0891  
1.7599  
1.7488  
1.7344  
1.7248  
1.7154  
1.6467  
1.6351  
1.6233  
1.6095  
1.5912

7.47  
7.26  
1.00

1.21  
2.42  
1.21  
2.42

16 15 14 13 12 11 10 9 8 7 6 5 4 3 2 1 0 -1 -2 -3

f1 (ppm)



— 198.986  
— 196.176

— 170.962  
— 168.076

154.307  
154.223  
137.445  
137.028  
136.528  
135.211  
135.103  
134.959  
134.691  
134.543  
134.450  
132.829  
132.768  
132.520  
132.261  
131.754  
130.918  
130.593  
130.266  
130.203  
130.137  
129.231  
129.134  
128.890  
128.702  
128.454  
128.072  
127.831  
127.786  
127.444  
127.408  
127.386  
127.237  
126.770  
126.731  
126.577  
126.461  
125.478  
122.676  
122.248  
40.6038  
40.4451  
40.3955  
40.1876  
-39.9772  
-39.7690  
-39.5612  
-39.3513  
-36.9436  
-27.0365  
-26.7383  
-20.7751  
-20.4950

### CNMR Spectrum of Compound 3q

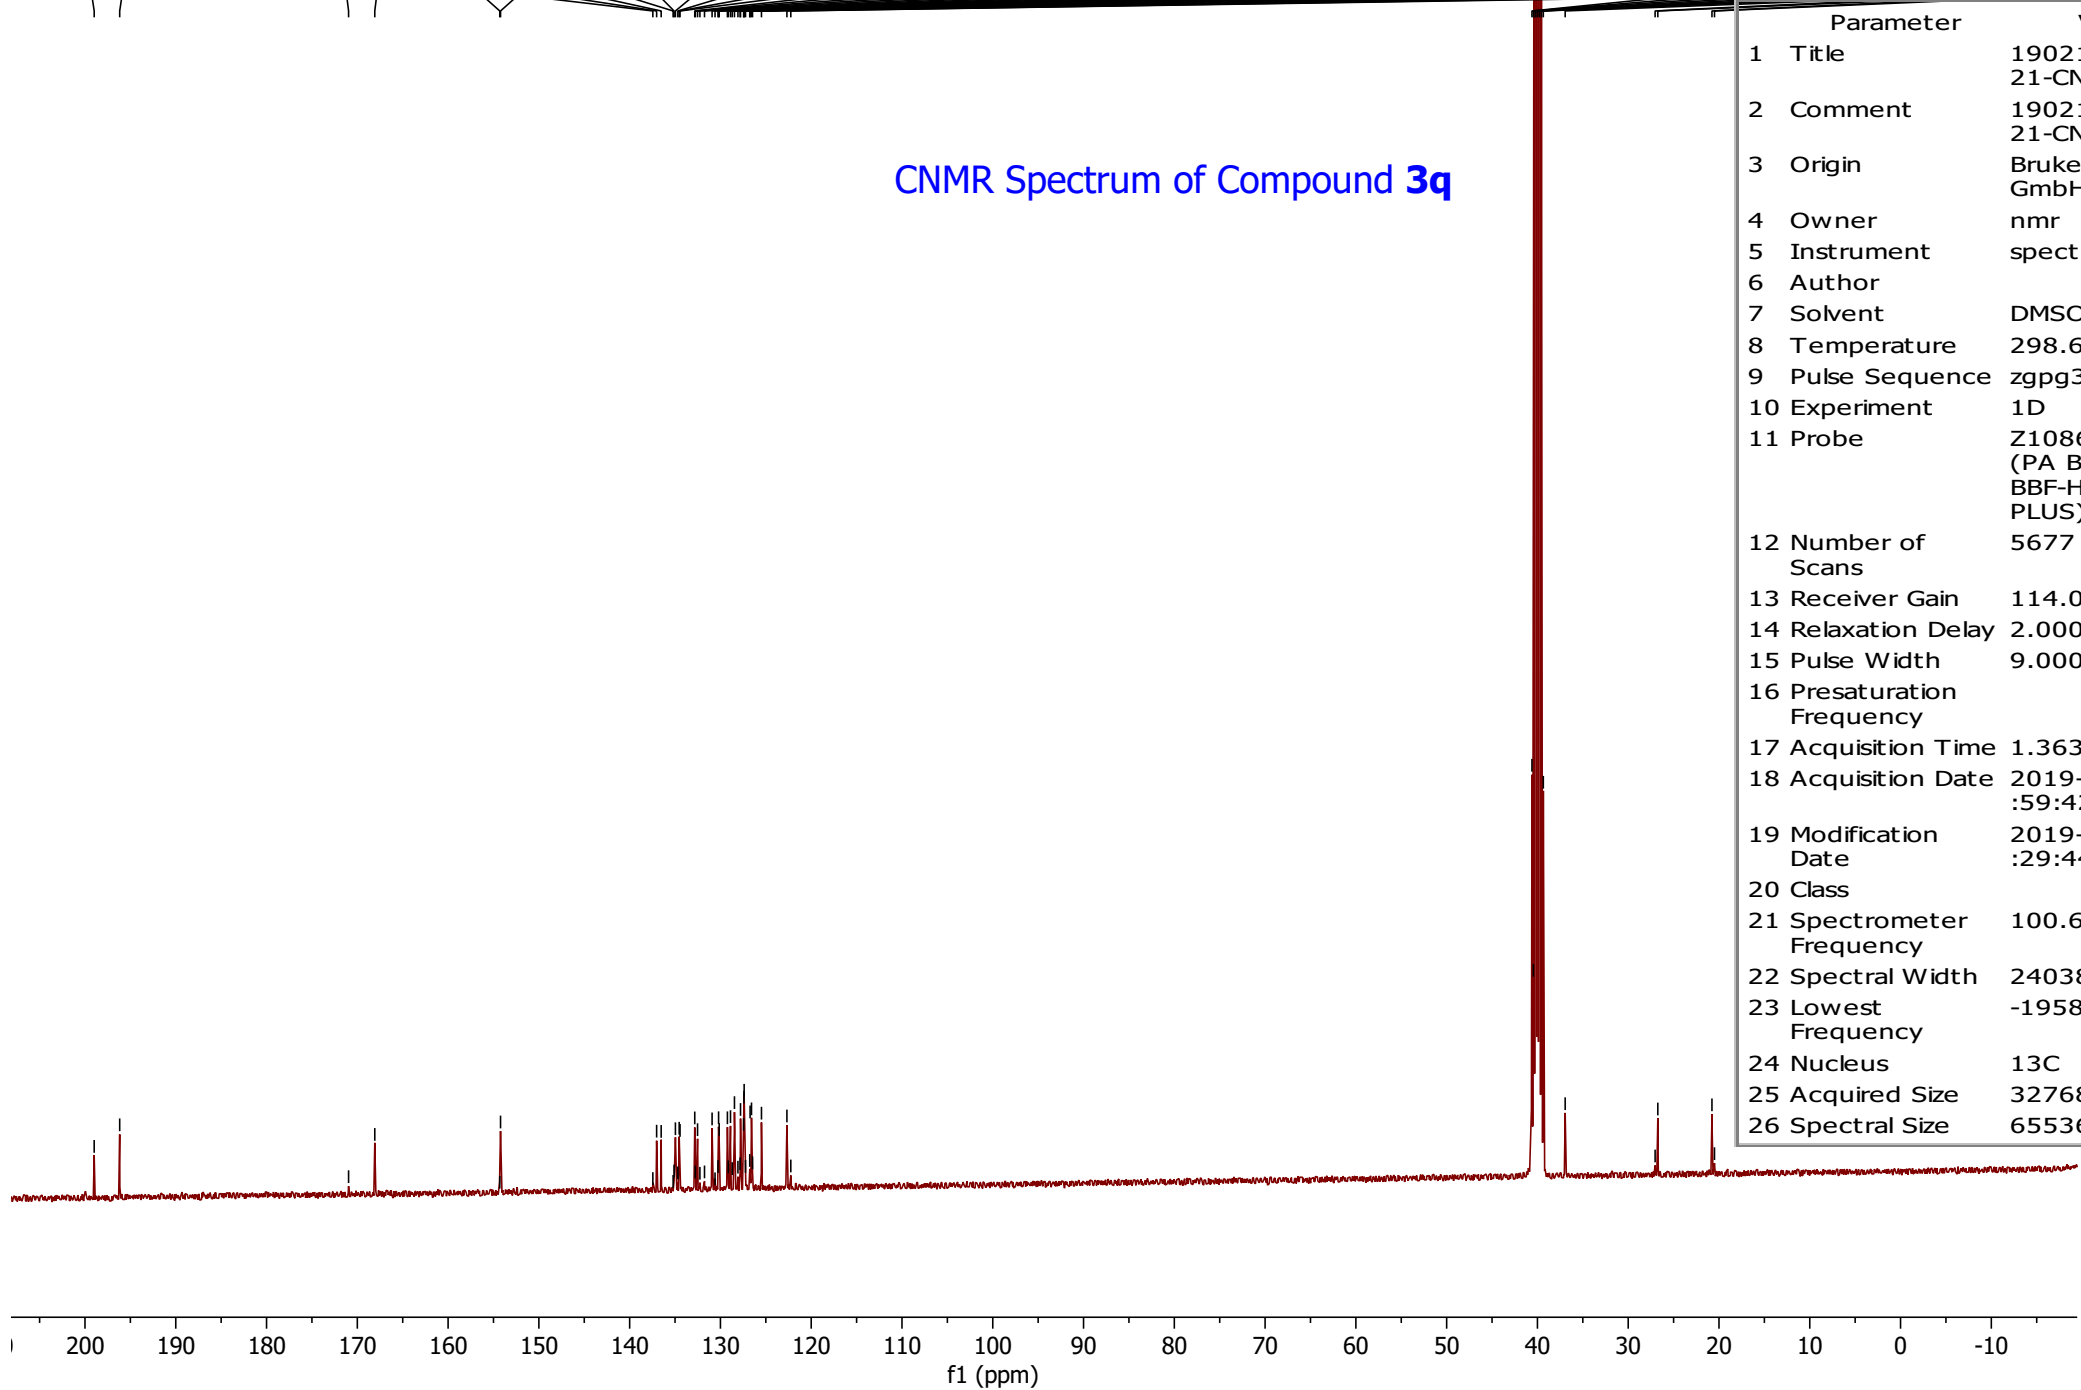

| Parameter                  | Value                                         |
|----------------------------|-----------------------------------------------|
| 1 Title                    | 190217-Sample 21-CNMR. 10.fid                 |
| 2 Comment                  | 190217-Sample 21-CNMR                         |
| 3 Origin                   | Bruker BioSpin GmbH                           |
| 4 Owner                    | nmr                                           |
| 5 Instrument               | spect                                         |
| 6 Author                   |                                               |
| 7 Solvent                  | DMSO                                          |
| 8 Temperature              | 298.6                                         |
| 9 Pulse Sequence           | zgpg30                                        |
| 10 Experiment              | 1D                                            |
| 11 Probe                   | Z108618_0166 (PA BBO 400S1 BBF-H-D-05 Z PLUS) |
| 12 Number of Scans         | 5677                                          |
| 13 Receiver Gain           | 114.0                                         |
| 14 Relaxation Delay        | 2.0000                                        |
| 15 Pulse Width             | 9.0000                                        |
| 16 Presaturation Frequency |                                               |
| 17 Acquisition Time        | 1.3631                                        |
| 18 Acquisition Date        | 2019-02-17T17:59:42                           |
| 19 Modification Date       | 2019-02-17T23:29:44                           |
| 20 Class                   |                                               |
| 21 Spectrometer Frequency  | 100.62                                        |
| 22 Spectral Width          | 24038.5                                       |
| 23 Lowest Frequency        | -1958.4                                       |
| 24 Nucleus                 | 13C                                           |
| 25 Acquired Size           | 32768                                         |
| 26 Spectral Size           | 65536                                         |

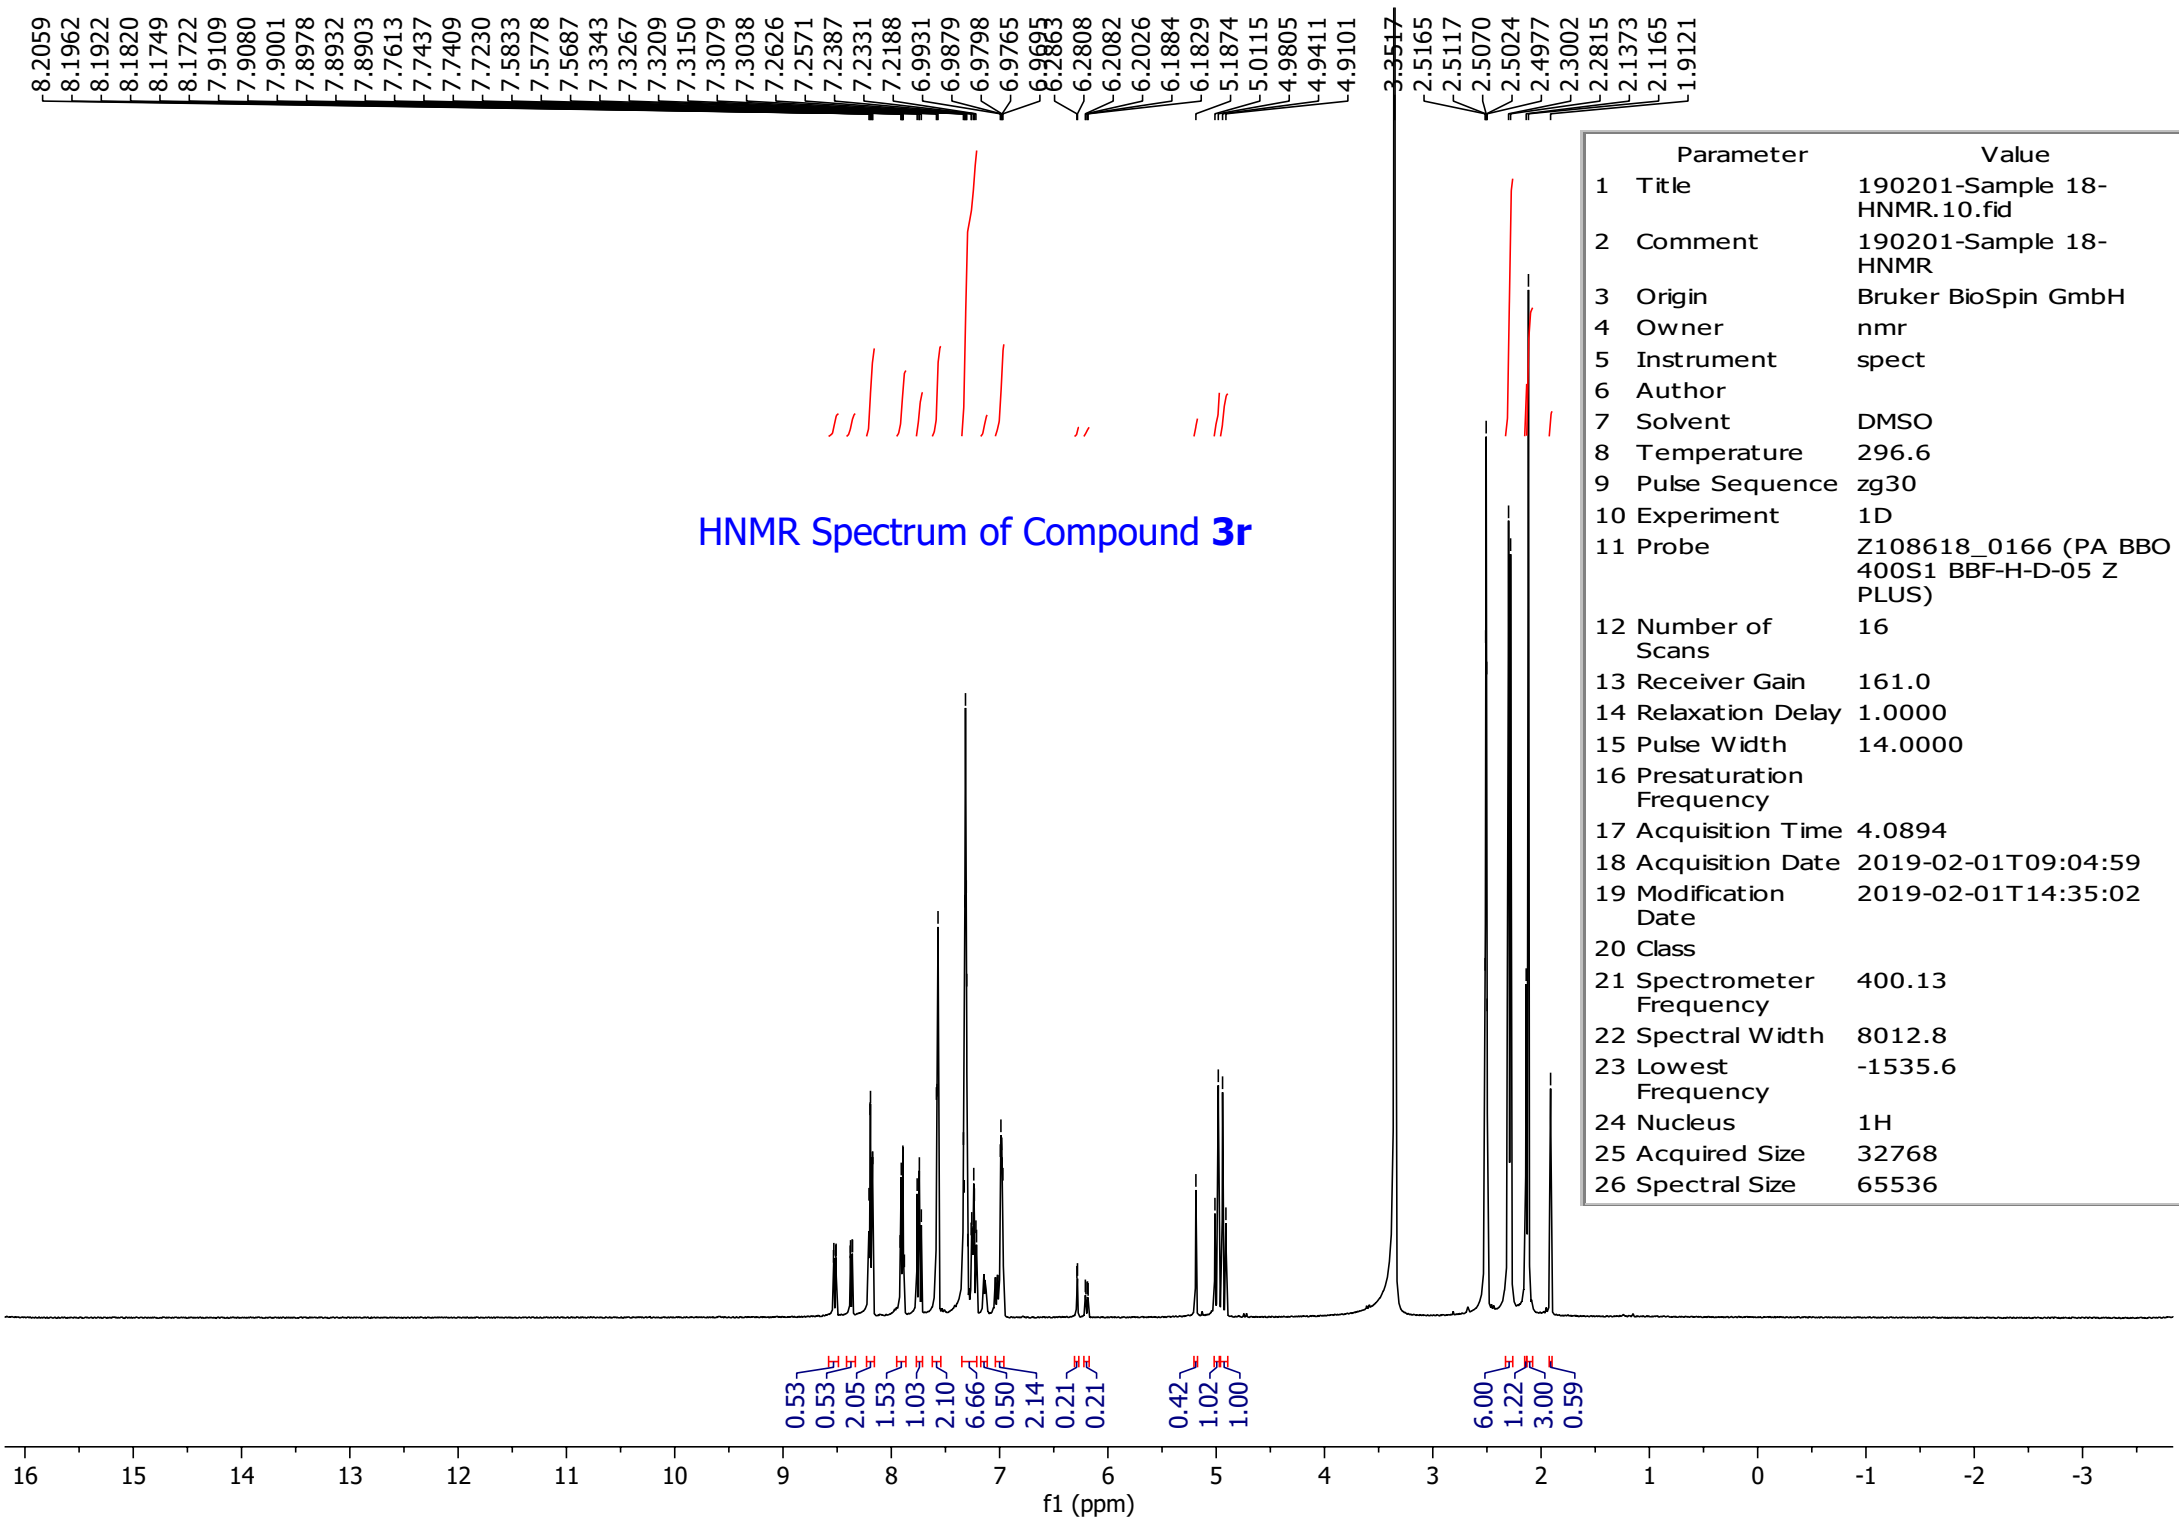

8.2059  
8.1962  
8.1922  
8.1820  
8.1749  
8.1722  
7.9109  
7.9080  
7.9001  
7.8978  
7.8932  
7.8903  
7.7613  
7.7437  
7.7409  
7.7230  
7.5833  
7.5778  
7.5687  
7.3343  
7.3267  
7.3209  
7.3150  
7.3079  
7.3038  
7.2626  
7.2571  
7.2387  
7.2331  
7.2188  
6.9931  
6.9879  
6.9798  
6.9765  
6.9695  
6.9663  
6.2808  
6.2082  
6.2026  
6.1884  
6.1829  
5.1874  
5.0115  
4.9805  
4.9411  
4.9101

3.5517  
2.5165  
2.5117  
2.5070  
2.5024  
2.4977  
2.3002  
2.2815  
2.1373  
2.1165  
1.9121

Red integration lines and values for the aromatic region peaks.

HNMR Spectrum of Compound 3r

Integration values for the aromatic region peaks: 0.53, 0.53, 2.05, 1.53, 1.03, 2.10, 6.66, 0.50, 2.14, 0.21, 0.21, 0.42, 1.02, 1.00

Integration values for the aliphatic region peaks: 6.00, 1.22, 3.00, 0.59

16 15 14 13 12 11 10 9 8 7 6 5 4 3 2 1 0 -1 -2 -3

f1 (ppm)

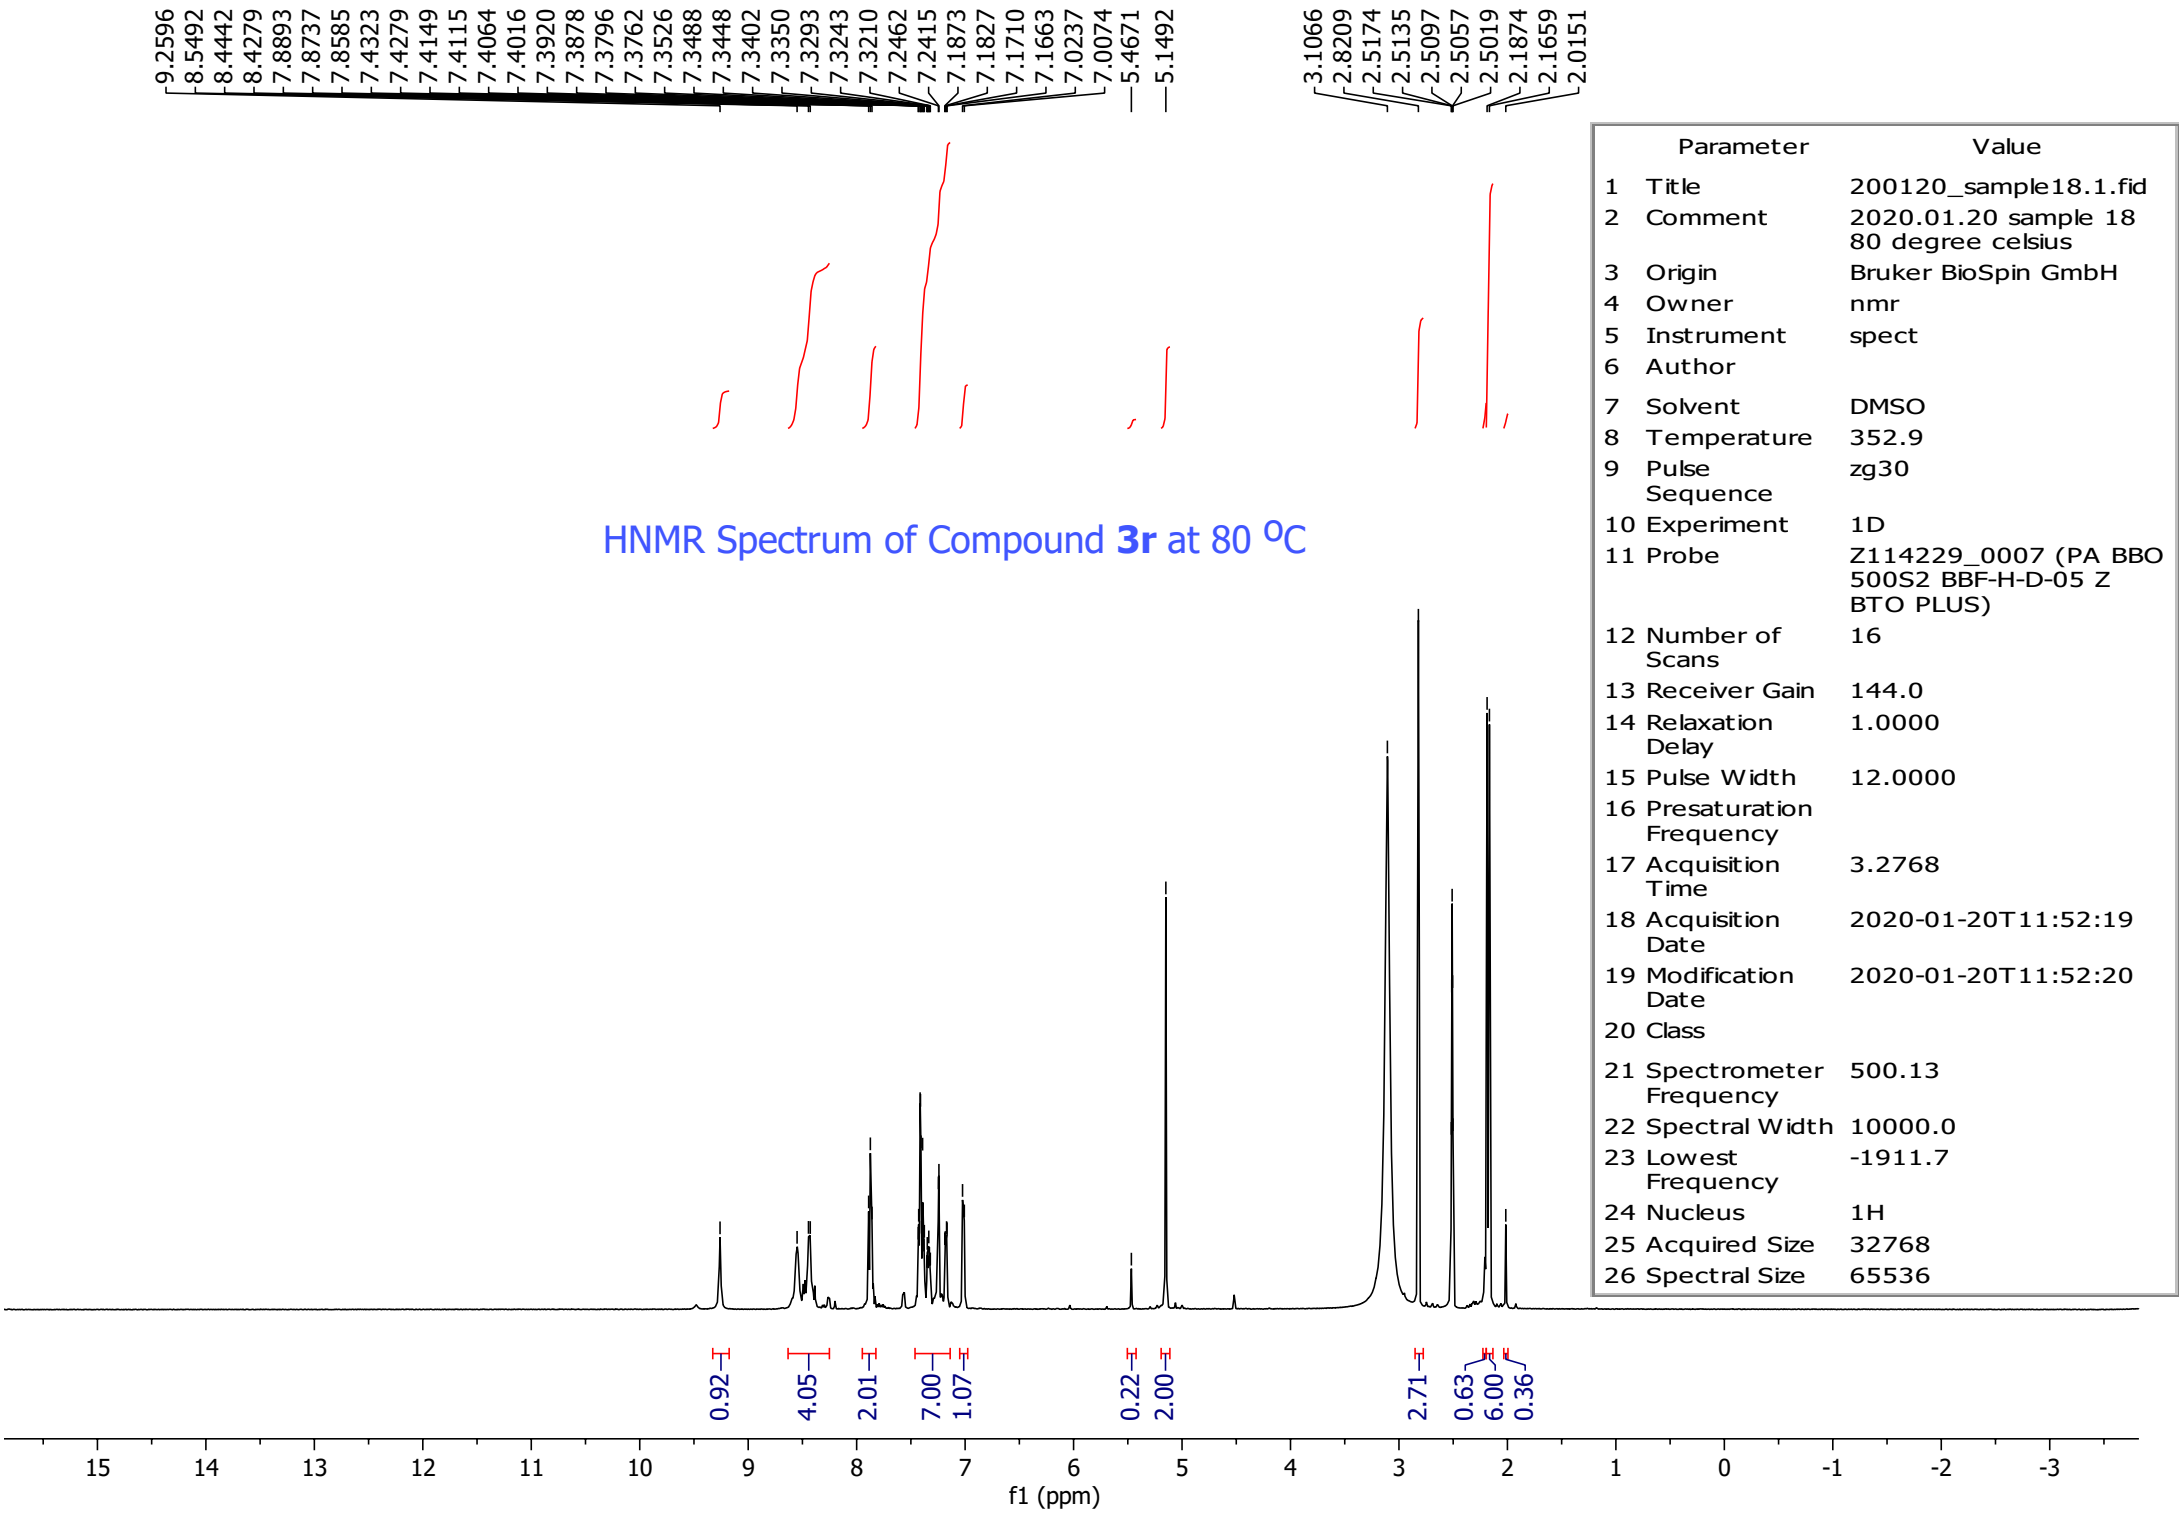

9.2596  
8.5492  
8.4442  
8.4279  
7.8893  
7.8737  
7.8585  
7.4323  
7.4279  
7.4149  
7.4115  
7.4064  
7.4016  
7.3920  
7.3878  
7.3796  
7.3762  
7.3526  
7.3488  
7.3448  
7.3402  
7.3350  
7.3293  
7.3243  
7.3210  
7.2462  
7.2415  
7.1873  
7.1827  
7.1710  
7.1663  
7.0237  
7.0074  
—5.4671  
—5.1492

3.1066  
2.8209  
2.5174  
2.5135  
2.5097  
2.5057  
2.5019  
2.1874  
2.1659  
2.0151

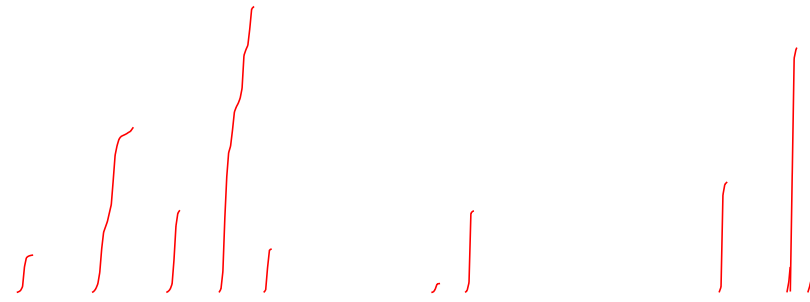

0.92  
4.05  
2.01  
7.00  
1.07  
0.22  
2.00  
2.71  
0.63  
6.00  
0.36

15 14 13 12 11 10 9 8 7 6 5 4 3 2 1 0 -1 -2 -3

f1 (ppm)

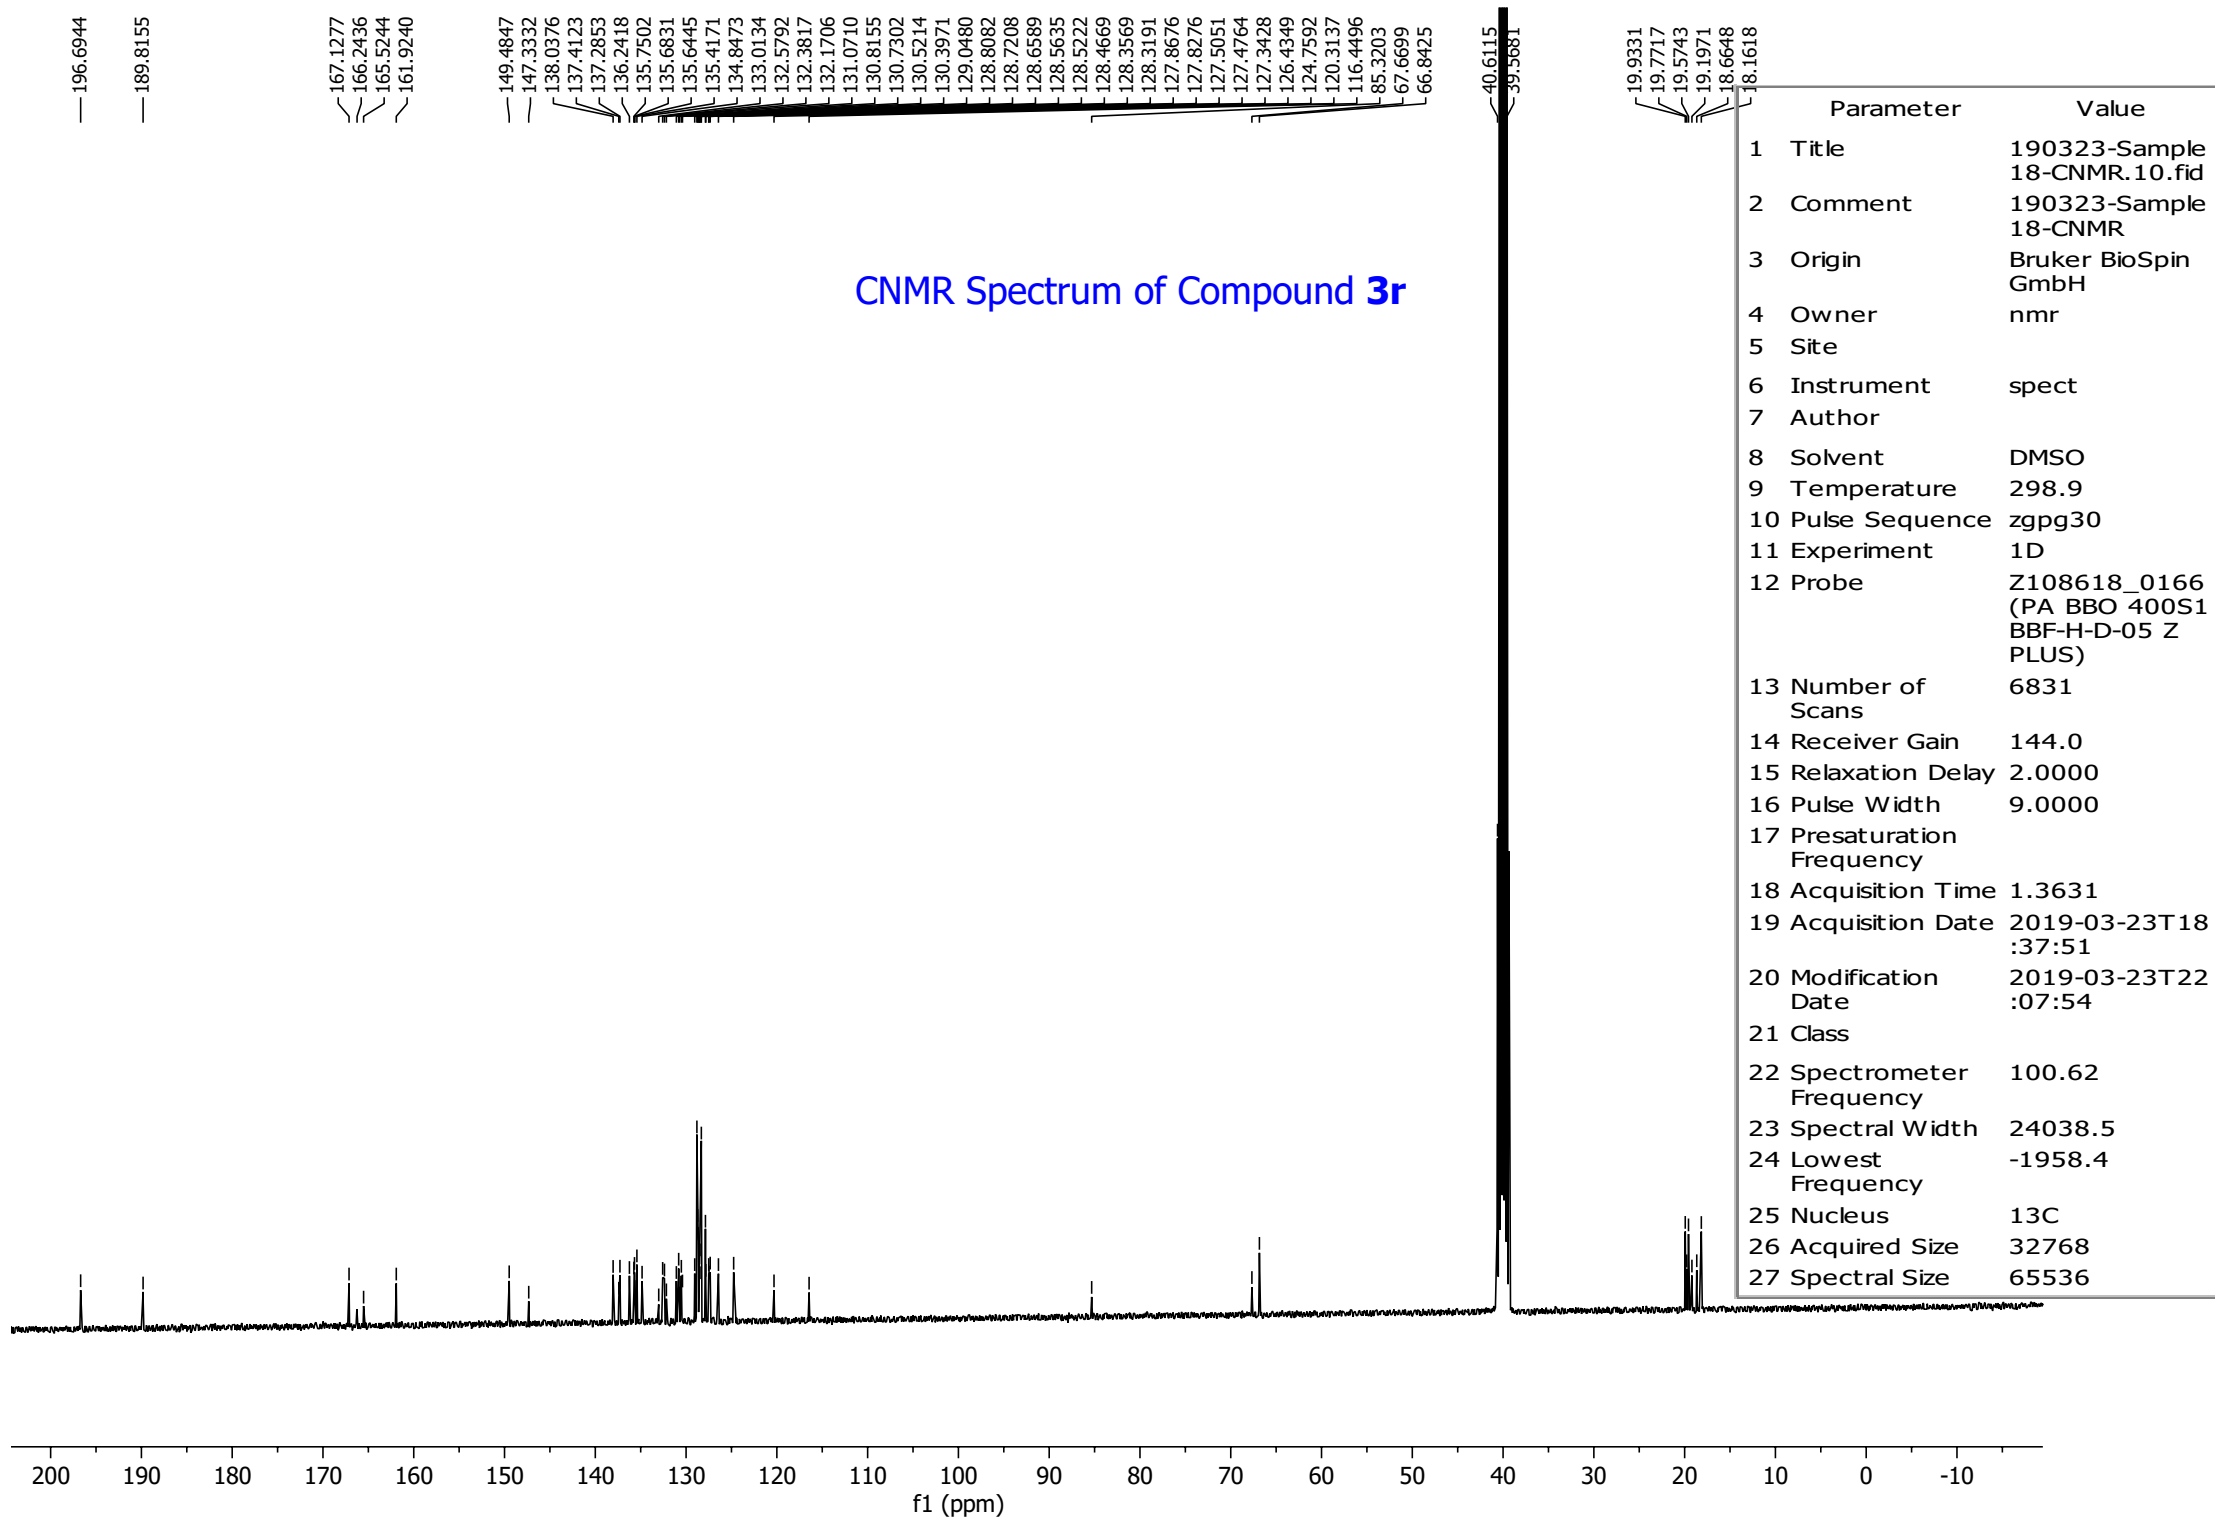

196.6944  
189.8155  
167.1277  
166.2436  
165.5244  
161.9240  
149.4847  
147.3332  
138.0376  
137.4123  
137.2853  
136.2418  
135.7502  
135.6831  
135.6445  
135.4171  
134.8473  
133.0134  
132.5792  
132.3817  
132.1706  
131.0710  
130.8155  
130.7302  
130.5214  
130.3971  
129.0480  
128.8082  
128.7208  
128.6589  
128.5635  
128.5222  
128.4669  
128.3569  
128.3191  
127.8676  
127.8276  
127.5051  
127.4764  
127.3428  
126.4349  
124.7592  
120.3137  
116.4496  
85.3203  
67.6699  
66.8425

40.6115  
39.5681

19.9331  
19.7717  
19.5743  
19.1971  
18.6648  
18.1618

200 190 180 170 160 150 140 130 120 110 100 90 80 70 60 50 40 30 20 10 0 -10

f1 (ppm)

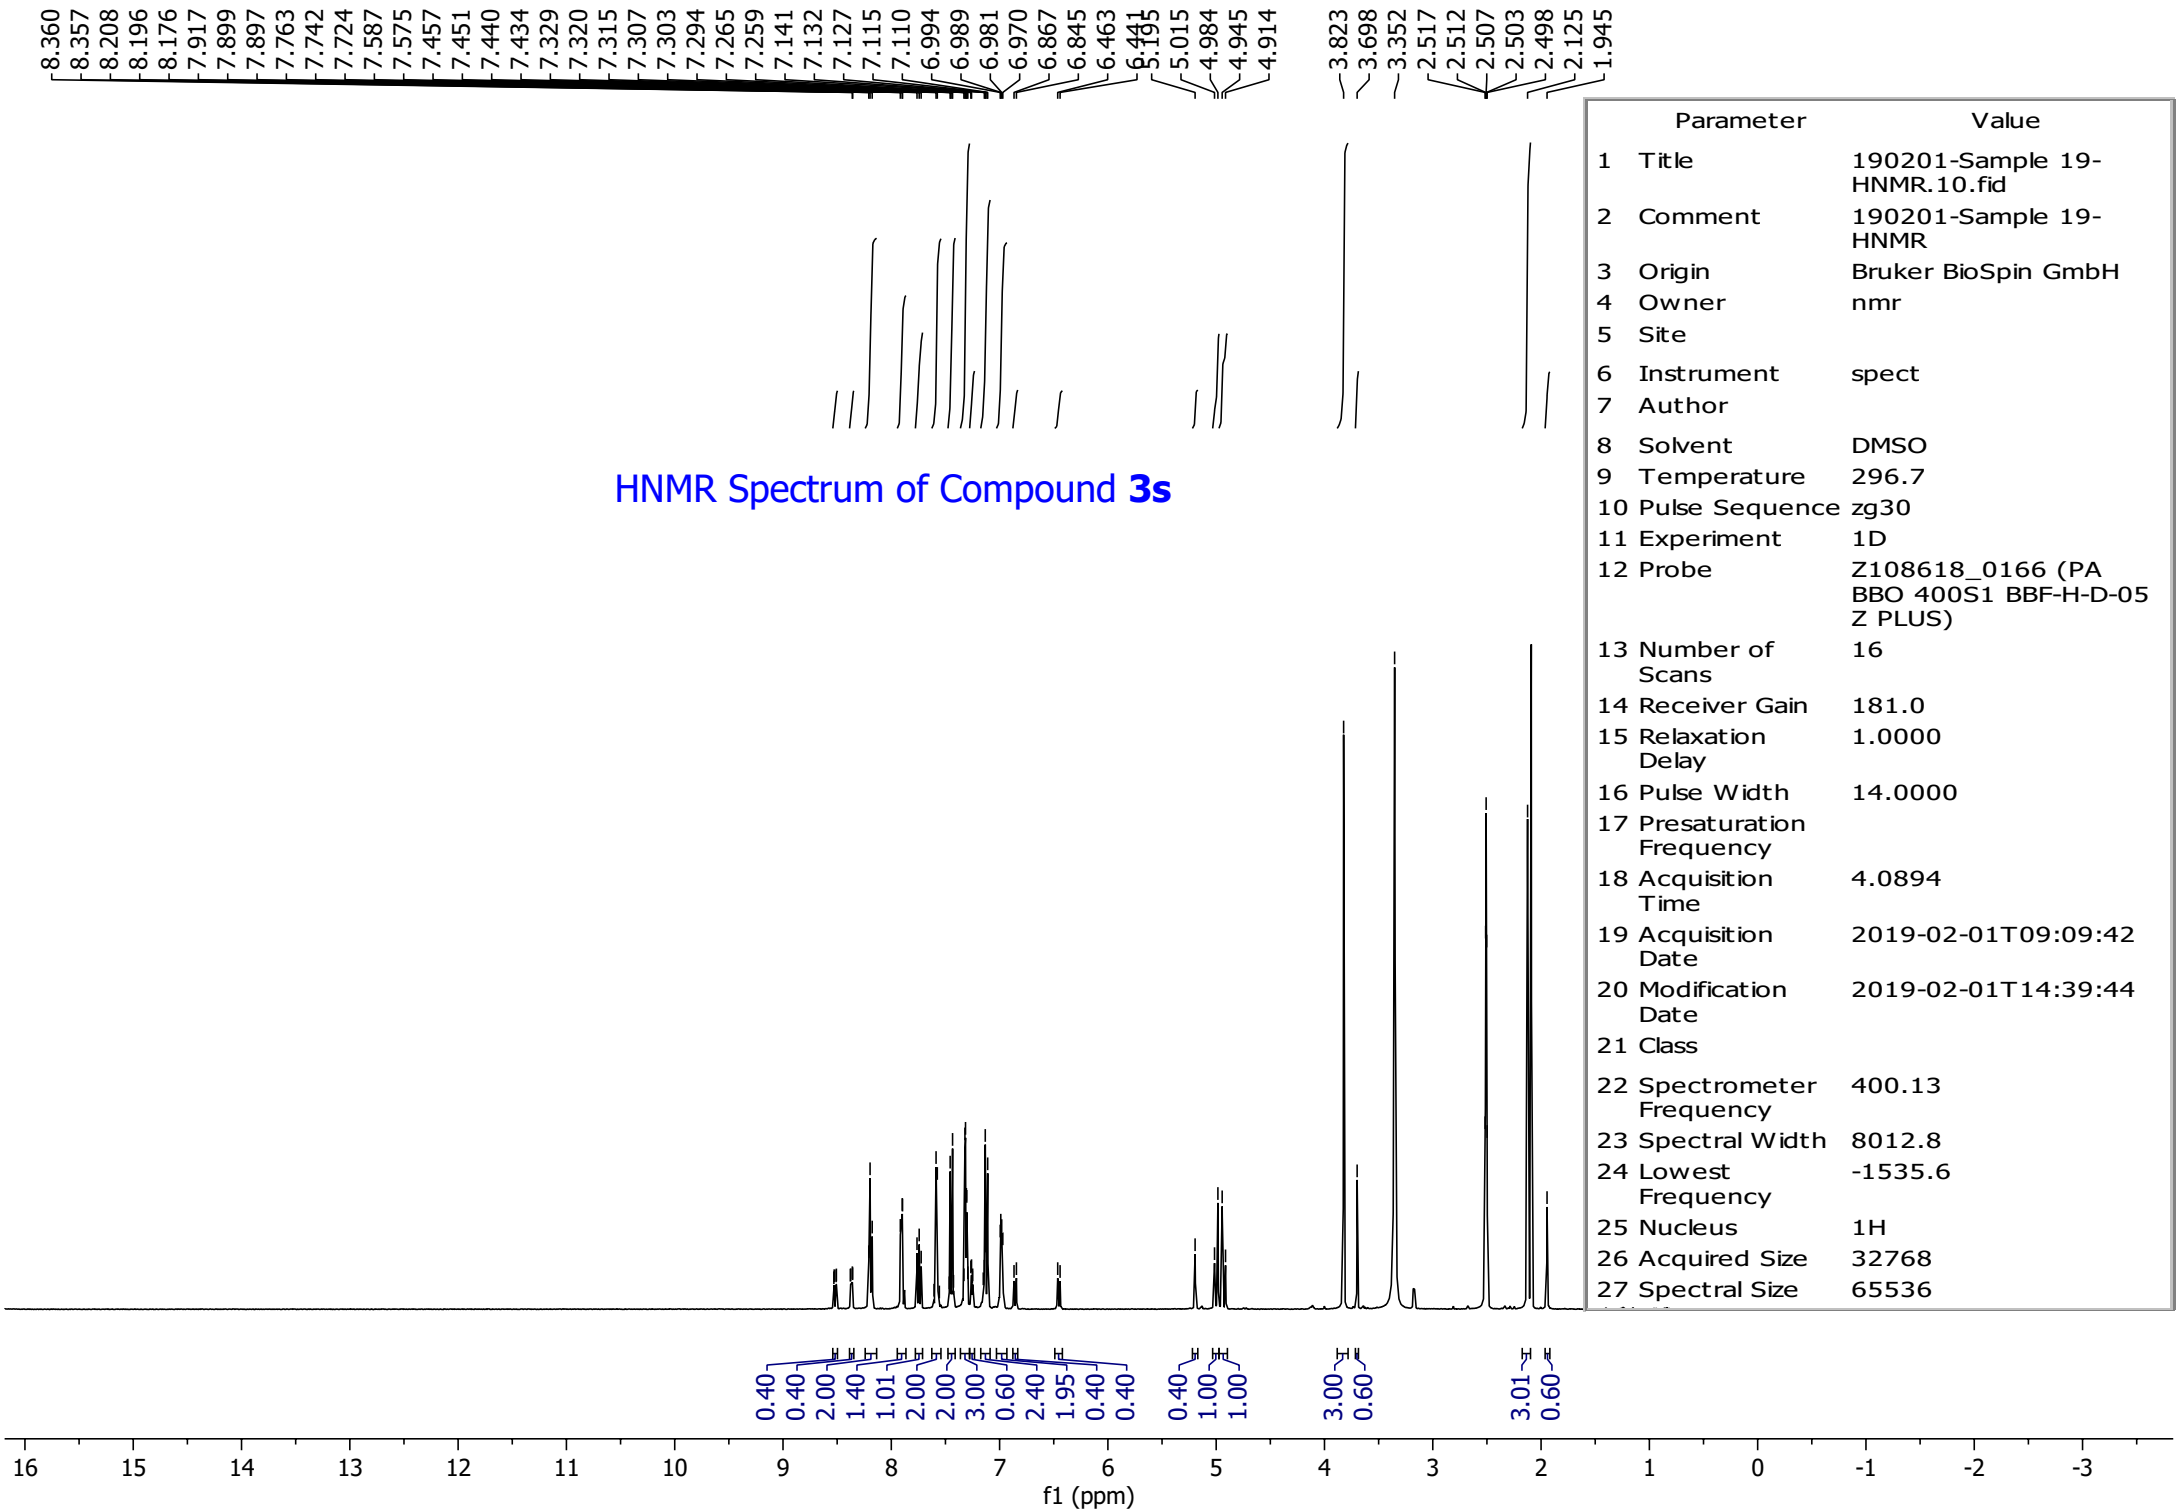

8.360  
8.357  
8.208  
8.196  
8.176  
7.917  
7.899  
7.897  
7.763  
7.742  
7.724  
7.587  
7.575  
7.457  
7.451  
7.440  
7.434  
7.329  
7.320  
7.315  
7.307  
7.303  
7.294  
7.265  
7.259  
7.141  
7.132  
7.127  
7.115  
7.110  
6.994  
6.989  
6.981  
6.970  
6.867  
6.845  
6.463  
6.441  
5.195  
5.015  
4.984  
4.945  
4.914  
  
3.823  
3.698  
3.352  
2.517  
2.512  
2.507  
2.503  
2.498  
2.125  
1.945

0.40  
0.40  
2.00  
1.40  
1.01  
2.00  
2.00  
3.00  
0.60  
2.40  
1.95  
0.40  
0.40  
  
0.40  
1.00  
1.00  
  
3.00  
0.60  
  
3.01  
0.60

16 15 14 13 12 11 10 9 8 7 6 5 4 3 2 1 0 -1 -2 -3

f1 (ppm)

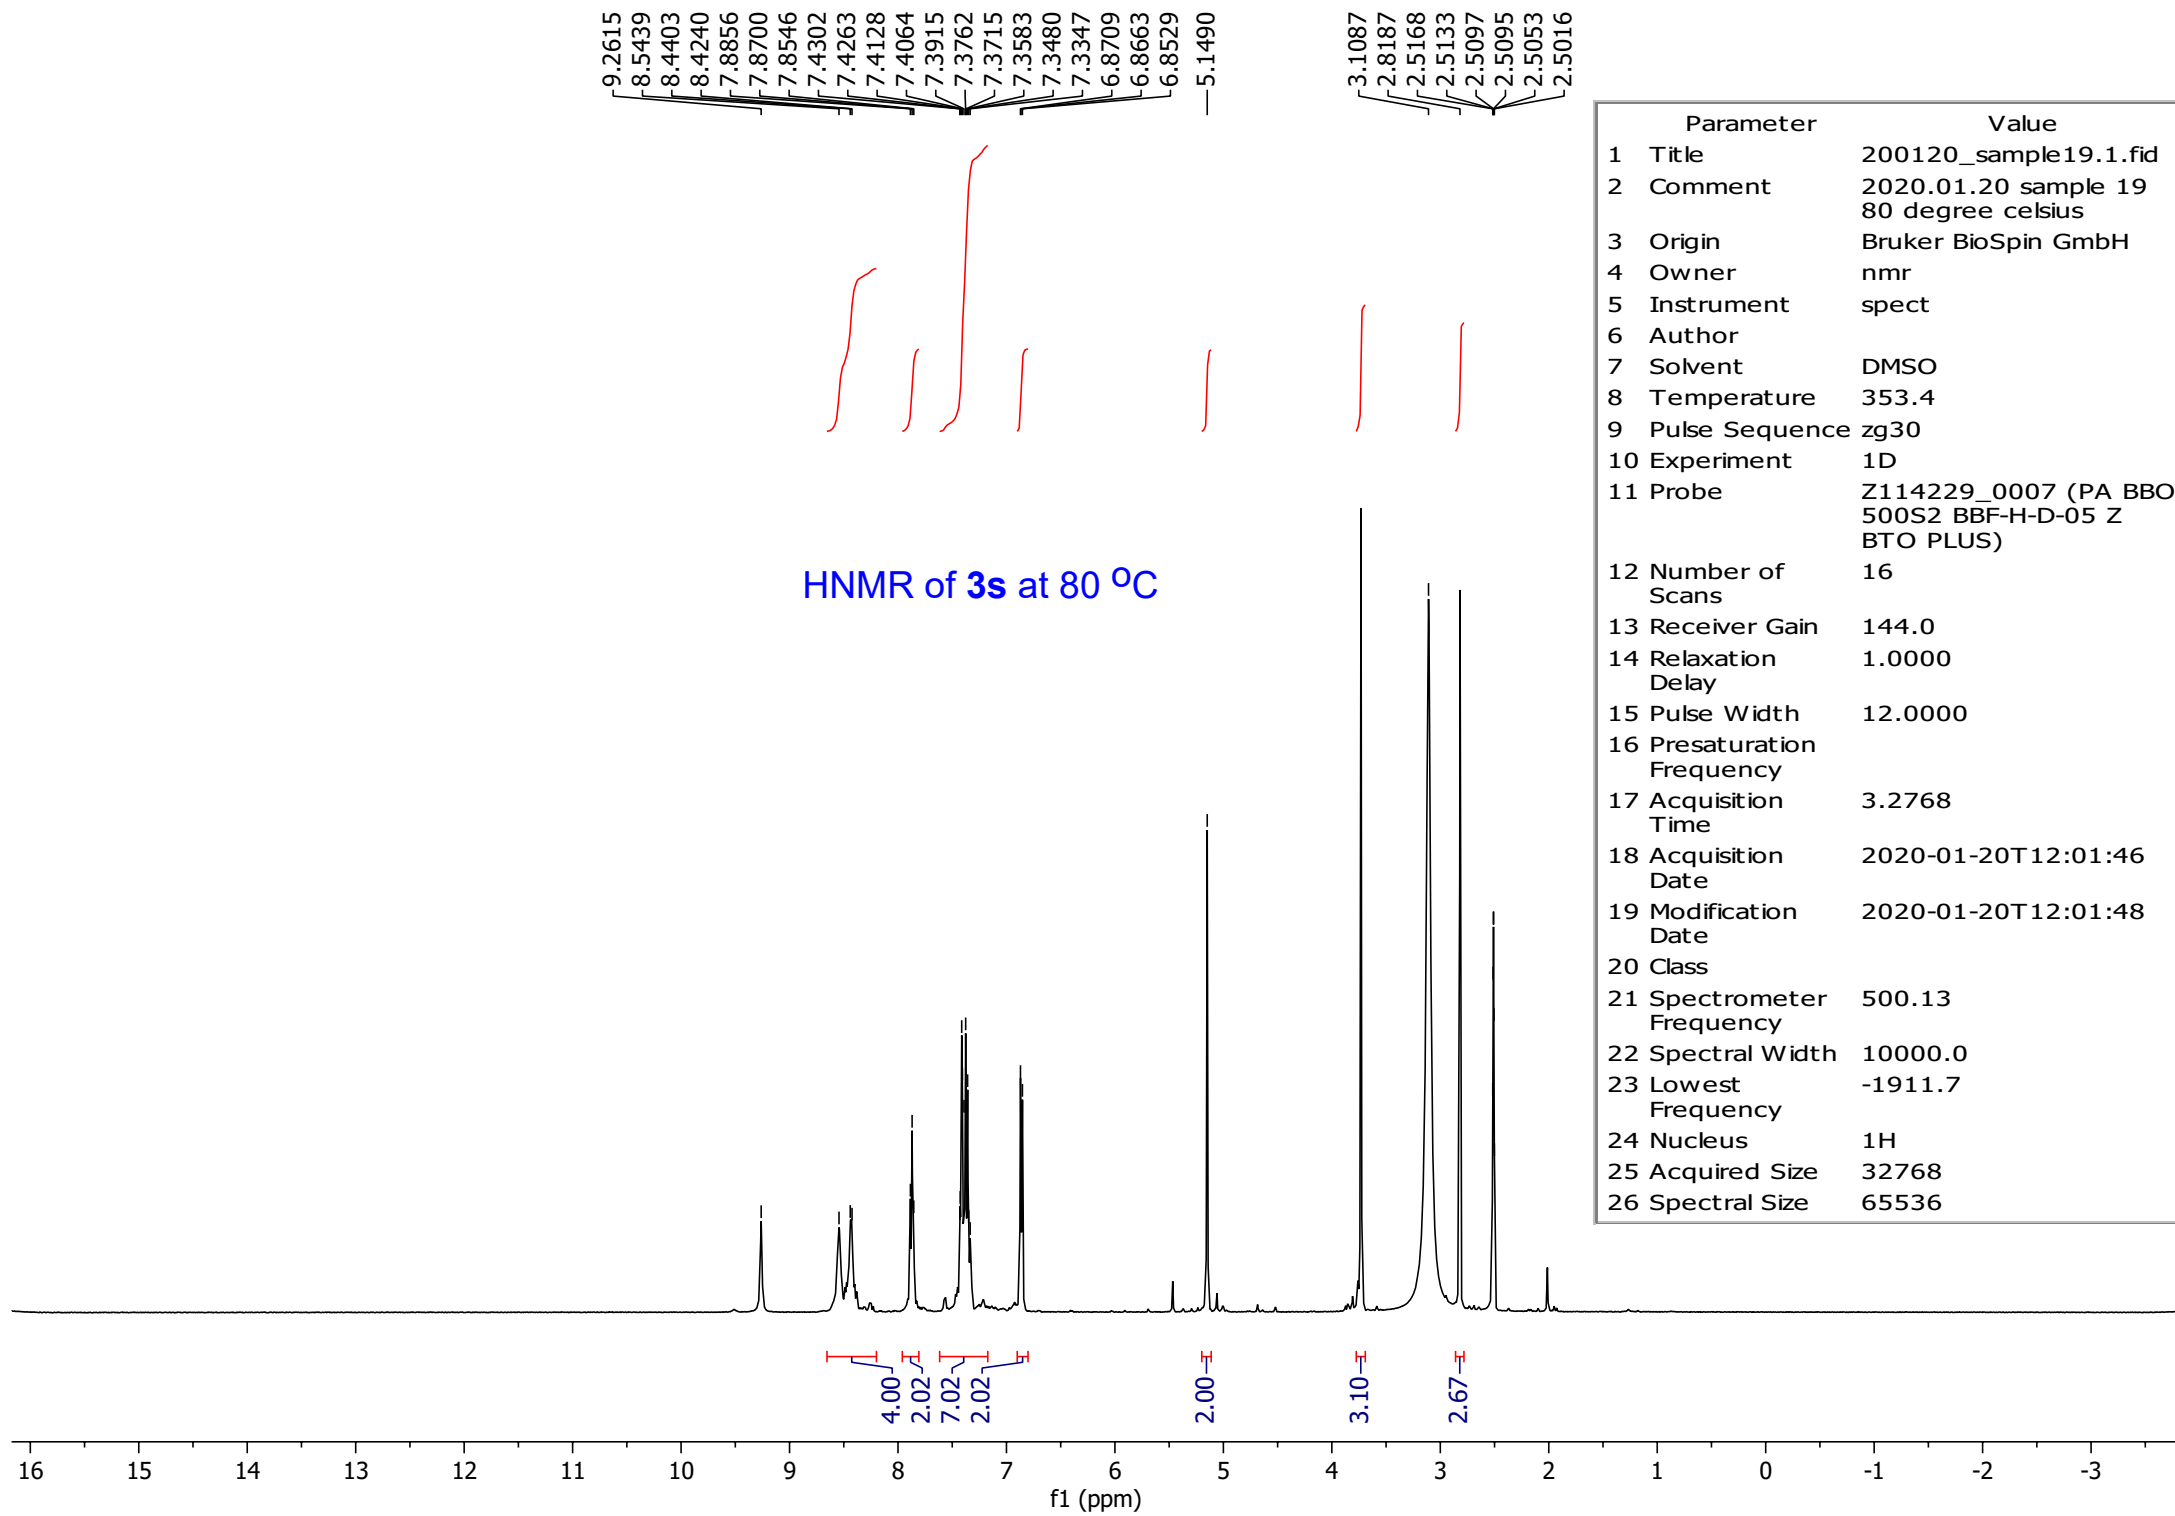

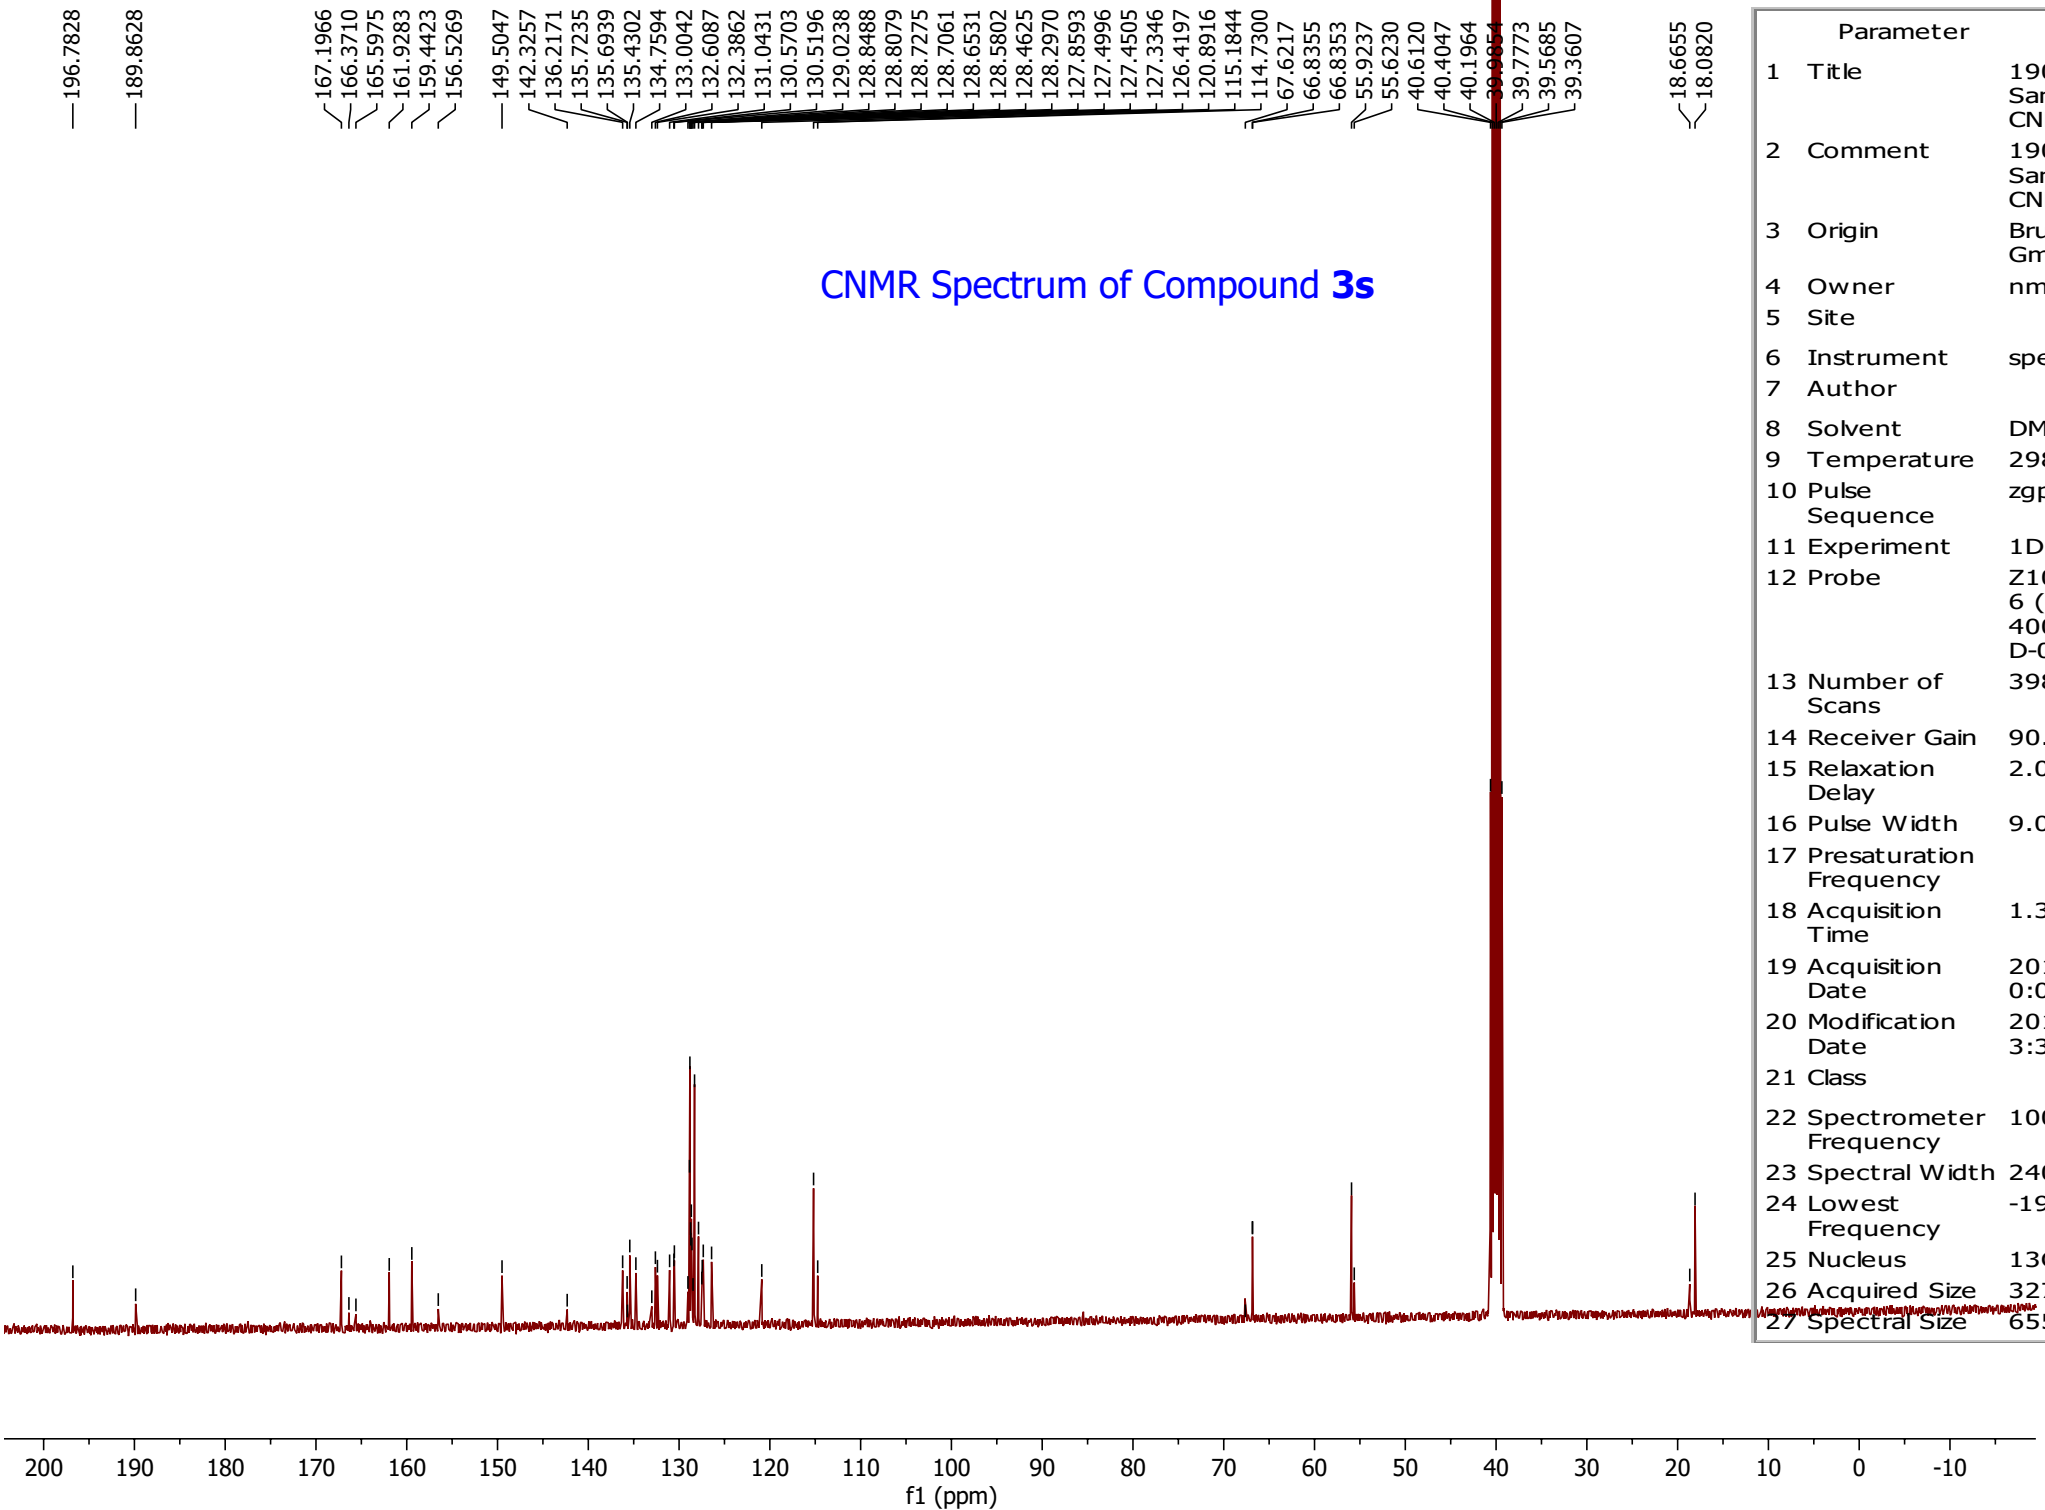

| Parameter                  | Value                                          |
|----------------------------|------------------------------------------------|
| 1 Title                    | 190322-Sample 19-CNMR.10.fid                   |
| 2 Comment                  | 190322-Sample 19-CNMR                          |
| 3 Origin                   | Bruker BioSpin GmbH                            |
| 4 Owner                    | nmr                                            |
| 5 Site                     |                                                |
| 6 Instrument               | spect                                          |
| 7 Author                   |                                                |
| 8 Solvent                  | DMSO                                           |
| 9 Temperature              | 298.9                                          |
| 10 Pulse Sequence          | zgpg30                                         |
| 11 Experiment              | 1D                                             |
| 12 Probe                   | Z108618_016 6 (PA BBO 400S1 BBF-H-D-05 Z PLUS) |
| 13 Number of Scans         | 3988                                           |
| 14 Receiver Gain           | 90.5                                           |
| 15 Relaxation Delay        | 2.0000                                         |
| 16 Pulse Width             | 9.0000                                         |
| 17 Presaturation Frequency |                                                |
| 18 Acquisition Time        | 1.3631                                         |
| 19 Acquisition Date        | 2019-03-22T10:07:18                            |
| 20 Modification Date       | 2019-03-22T13:37:20                            |
| 21 Class                   |                                                |
| 22 Spectrometer Frequency  | 100.62                                         |
| 23 Spectral Width          | 24038.5                                        |
| 24 Lowest Frequency        | -1958.4                                        |
| 25 Nucleus                 | <sup>13</sup> C                                |
| 26 Acquired Size           | 32768                                          |
| 27 Spectral Size           | 65536                                          |

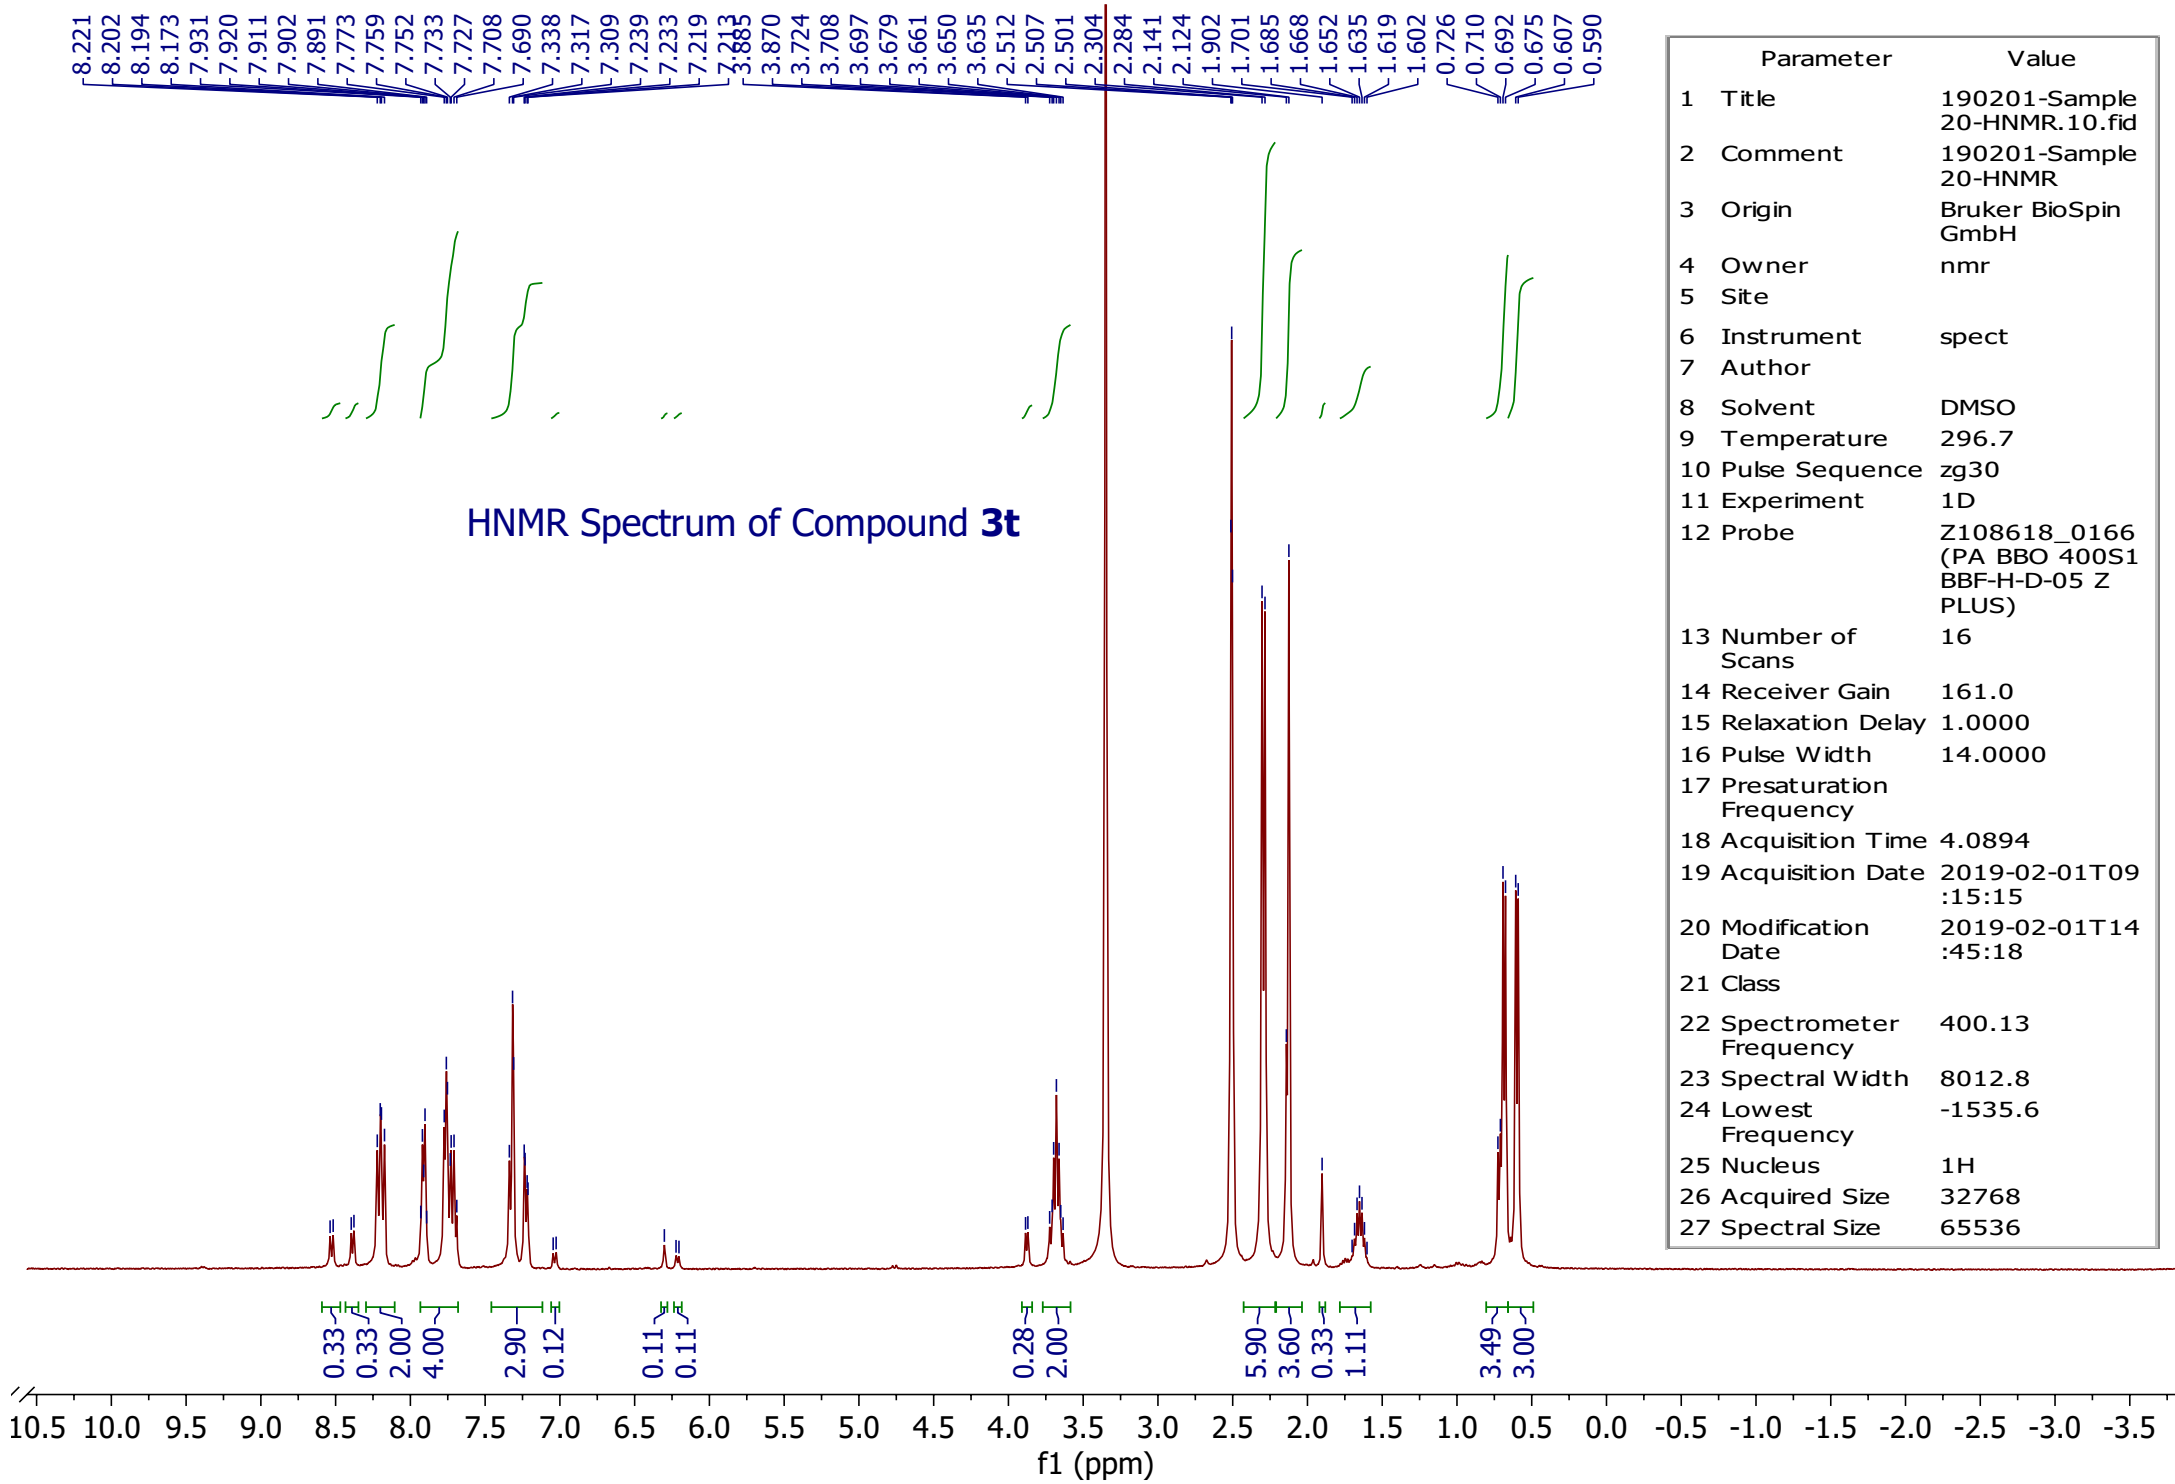



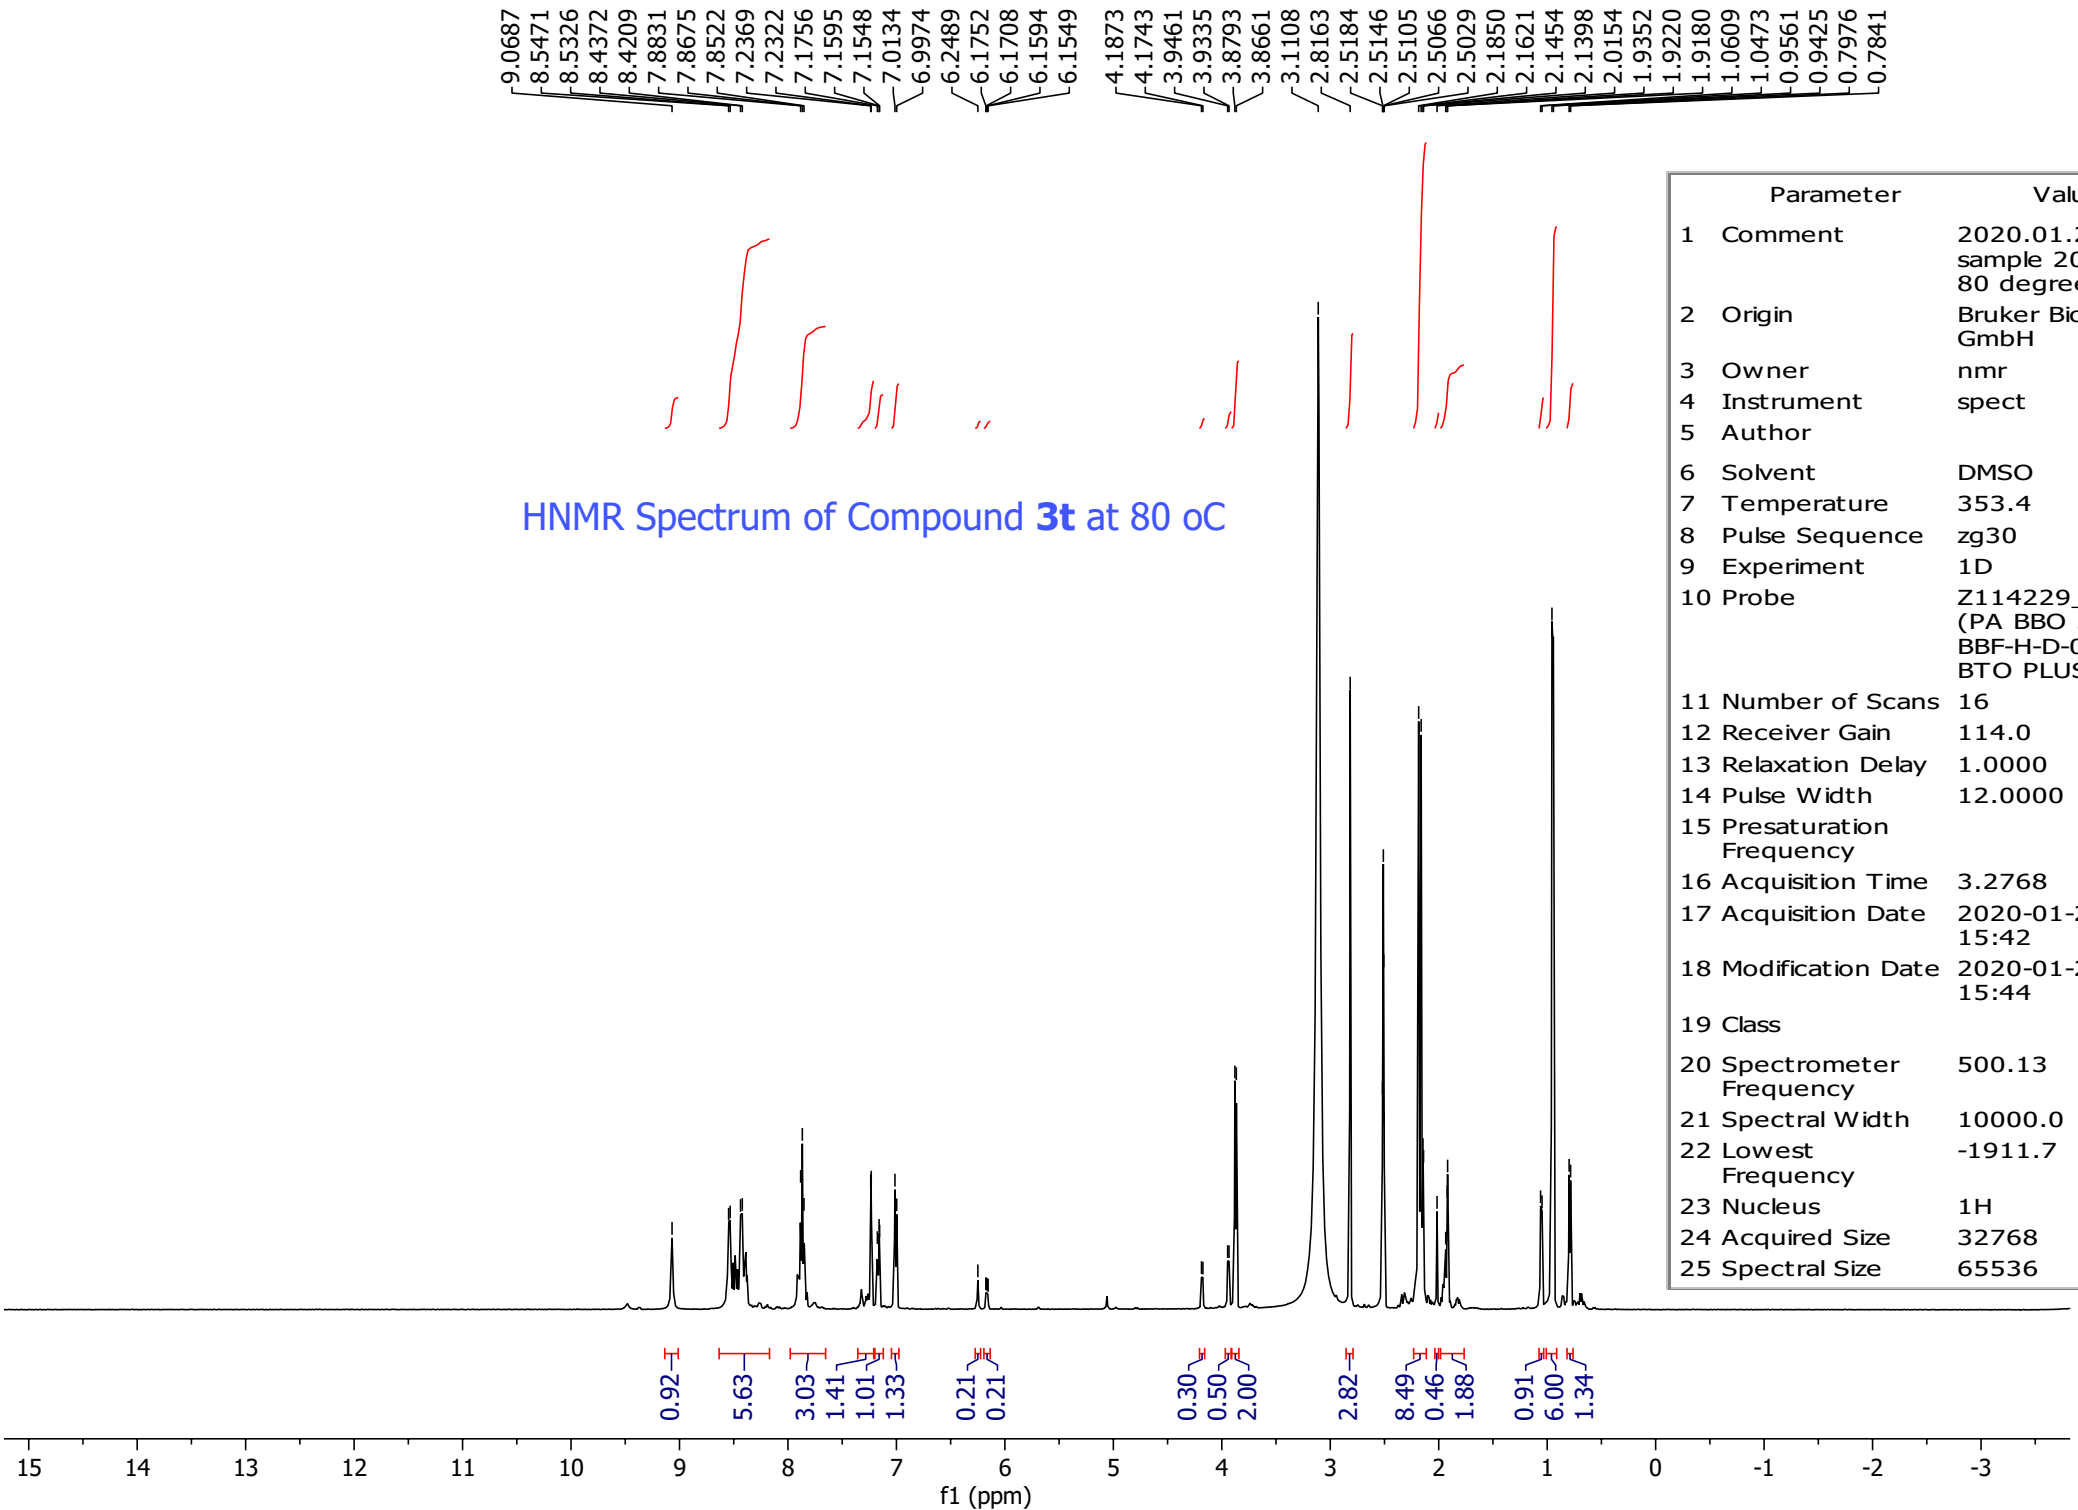

| Parameter                  | Value                                             |
|----------------------------|---------------------------------------------------|
| 1 Comment                  | 2020.01.20 sample 20 80 degree celsius            |
| 2 Origin                   | Bruker BioSpin GmbH                               |
| 3 Owner                    | nmr                                               |
| 4 Instrument               | spect                                             |
| 5 Author                   |                                                   |
| 6 Solvent                  | DMSO                                              |
| 7 Temperature              | 353.4                                             |
| 8 Pulse Sequence           | zg30                                              |
| 9 Experiment               | 1D                                                |
| 10 Probe                   | Z114229_0007 (PA BBO 500S2 BBF-H-D-05 Z BTO PLUS) |
| 11 Number of Scans         | 16                                                |
| 12 Receiver Gain           | 114.0                                             |
| 13 Relaxation Delay        | 1.0000                                            |
| 14 Pulse Width             | 12.0000                                           |
| 15 Presaturation Frequency |                                                   |
| 16 Acquisition Time        | 3.2768                                            |
| 17 Acquisition Date        | 2020-01-20T12:15:42                               |
| 18 Modification Date       | 2020-01-20T12:15:44                               |
| 19 Class                   |                                                   |
| 20 Spectrometer Frequency  | 500.13                                            |
| 21 Spectral Width          | 10000.0                                           |
| 22 Lowest Frequency        | -1911.7                                           |
| 23 Nucleus                 | 1H                                                |
| 24 Acquired Size           | 32768                                             |
| 25 Spectral Size           | 65536                                             |

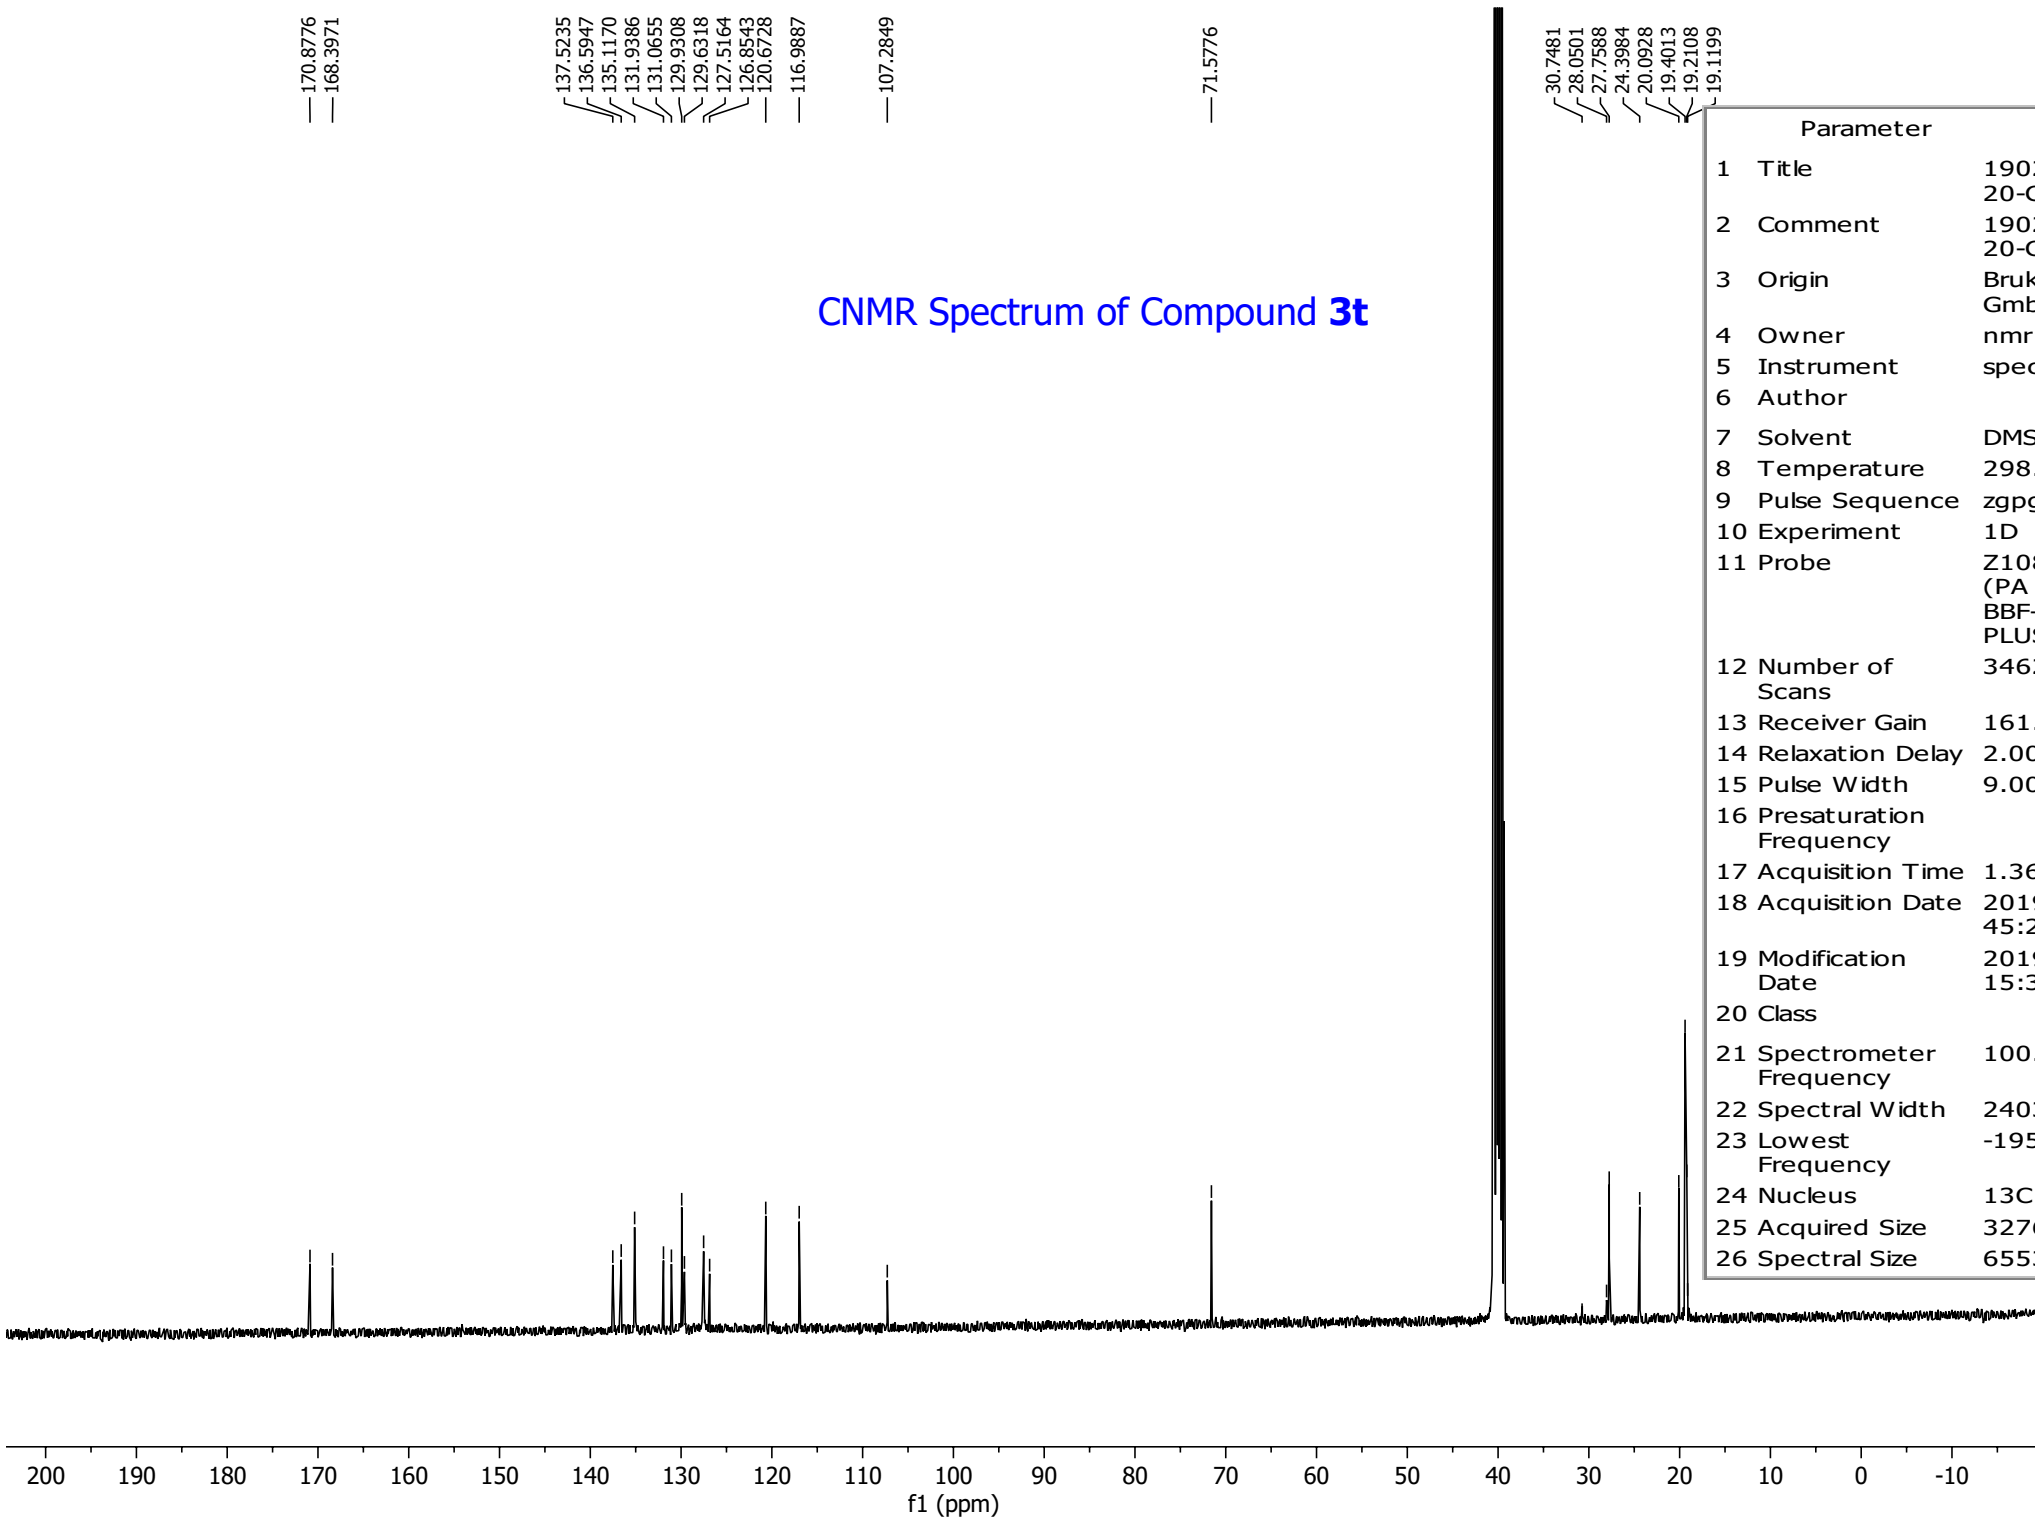

| Parameter                  | Value                                         |
|----------------------------|-----------------------------------------------|
| 1 Title                    | 190225-Sample 20-CNMR.10.fid                  |
| 2 Comment                  | 190225-Sample 20-CNMR                         |
| 3 Origin                   | Bruker BioSpin GmbH                           |
| 4 Owner                    | nmr                                           |
| 5 Instrument               | spect                                         |
| 6 Author                   |                                               |
| 7 Solvent                  | DMSO                                          |
| 8 Temperature              | 298.9                                         |
| 9 Pulse Sequence           | zgpg30                                        |
| 10 Experiment              | 1D                                            |
| 11 Probe                   | Z108618_0166 (PA BBO 400S1 BBF-H-D-05 Z PLUS) |
| 12 Number of Scans         | 3462                                          |
| 13 Receiver Gain           | 161.0                                         |
| 14 Relaxation Delay        | 2.0000                                        |
| 15 Pulse Width             | 9.0000                                        |
| 16 Presaturation Frequency |                                               |
| 17 Acquisition Time        | 1.3631                                        |
| 18 Acquisition Date        | 2019-02-25T14:45:28                           |
| 19 Modification Date       | 2019-02-25T20:15:30                           |
| 20 Class                   |                                               |
| 21 Spectrometer Frequency  | 100.62                                        |
| 22 Spectral Width          | 24038.5                                       |
| 23 Lowest Frequency        | -1958.4                                       |
| 24 Nucleus                 | 13C                                           |
| 25 Acquired Size           | 32768                                         |
| 26 Spectral Size           | 65536                                         |
